# Supplementary material for: t(8;9)(p22;p24)/PCM1-JAK2 Activates SOCS2 and SOCS3 via STAT5
Source: PLoS One. 2013 Jan 23;8(1):e53767. doi: 10.1371/journal.pone.0053767 (PMC3553112; doi:10.1371/journal.pone.0053767)
Supplement: Table S3 — Top upregulated (A) and downregulated (B) genes in MAC-1/2A/2B cells. Shows 400 genes most conspicuously expressed when compared to control T-ALL and CTCL cell lines listed in the Materials and Methods. (XLSX) [file pone.0053767.s006.xlsx]

## Sheet: Sheet1
	Gene Symbol	Gene Title	Representative Public ID	LocusLink	OMIM	SwissProt	Gene Ontology Biological Process	Gene Ontology Cellular Component	Gene Ontology Molecular Function	Alignments	Pathway
1557066_at	LUC7L	LUC7-like (S. cerevisiae)	AI744735	55692	607782	Q9NQ29	---	---	---	chr16:196018-219451 (-) // 99.31 // p13.3	---
209905_at	HOXA9	homeo box A9	AI246769	3205	142956	P31269	6350 // transcription // Unknown /// 6355 // regulation of transcription, DNA-dependent // Unknown /// 7275 // development // Unknown	5634 // nucleus // Unknown	3700 // transcription factor activity // Unknown /// 16563 // transcriptional activator activity // Unknown	chr7:26975296-26978389 (-) // 98.61 // p15.2	---
1556062_at	LOC283012	hypothetical protein LOC283012	AW182934	283012	---	---	---	---	---	chr10:92654375-92658295 (+) // 44.34 // q23.31	---
243452_at	B4GALT6	UDP-Gal:betaGlcNAc beta 1,4- galactosyltransferase, polypeptide 6	BE895304	9331	604017	Q9UBX8 /// Q6NT00 /// Q6NT09 /// Q8WZ95	5975 // carbohydrate metabolism // Unknown	5794 // Golgi apparatus // Unknown /// 16021 // integral to membrane // Unknown	287 // magnesium ion binding // Unknown /// 8378 // galactosyltransferase activity // Unknown /// 16757 // transferase activity, transferring glycosyl groups // Unknown /// 30145 // manganese ion binding // Unknown	chr18:27520187-27521274 (+) // 75.62 // q12.1	---
1557993_at	---	CDNA clone IMAGE:4309350, partial cds	BE397239	---	---	---	---	---	---	chr16:80551021-80551800 (+) // 96.73 // q23.2	---
213282_at	---	---	BE501952	---	---	---	---	---	---	chrX:84152813-84154466 (+) // 84.43 // q21.1	---
1556923_at	ACOX1	Acyl-Coenzyme A oxidase 1, palmitoyl	AW051321	51	264470	Q15067 /// Q7Z3W5	6118 // electron transport // Unknown /// 6629 // lipid metabolism // Unknown /// 6635 // fatty acid beta-oxidation // Unknown /// 6693 // prostaglandin metabolism // Unknown	5777 // peroxisome // Unknown	3997 // acyl-CoA oxidase activity // Unknown /// 9053 // electron donor activity // Unknown /// 16491 // oxidoreductase activity // Unknown	chr17:71481834-71484058 (-) // 74.17 // q25.1	Fatty acid metabolism // KEGG
210721_s_at	PAK7	p21(CDKN1A)-activated kinase 7	AB040812	57144	608038	Q9P286 /// Q9UJQ0 /// Q8TB93	6468 // protein amino acid phosphorylation // Unknown	---	4674 // protein serine/threonine kinase activity // Unknown /// 5524 // ATP binding // Unknown /// 16740 // transferase activity // Unknown	chr20:9466036-9767479 (-) // 95.99 // p12.2	---
233046_at	C1S	Complement component 1, s subcomponent	AK026468	716	120580	P09871 /// Q68D96	6508 // proteolysis and peptidolysis // Unknown /// 6958 // complement activation, classical pathway // Unknown	5576 // extracellular region // Unknown	3816 // complement component C1s activity // Unknown /// 4263 // chymotrypsin activity // Unknown /// 4295 // trypsin activity // Unknown /// 5509 // calcium ion binding // Unknown /// 16787 // hydrolase activity // Unknown	chr12:6987129-6988403 (-) // 30.89 // p13.31	Complement_Activation_Classical // GenMAPP
243310_at	---	---	AI051572	---	---	---	---	---	---	chr14:74378487-74379173 (+) // 74.6 // q24.3	---
224937_at	PTGFRN	prostaglandin F2 receptor negative regulator	BF311866	5738	601204	Q9P2B2 /// Q9H3U3	17148 // negative regulation of protein biosynthesis // Unknown	16021 // integral to membrane // Unknown	5515 // protein binding // Unknown	chr1:117164730-117245017 (+) // 96.91 // p13.1	---
1560899_at	ASTN	Astrotactin	H50121	460	600904	O14525 /// Q96BL7	7155 // cell adhesion // Unknown /// 7158 // neuronal cell adhesion // Unknown /// 16477 // cell migration // Unknown	16021 // integral to membrane // Unknown	5515 // protein binding // Unknown	chr1:173632296-173632873 (-) // 78.81 // q25.2	---
202834_at	AGT	angiotensinogen (serine (or cysteine) proteinase inhibitor, clade A (alpha-1 antiproteinase, antitrypsin), member 8)	NM_000029	183	106150 /// 145500	P01019 /// Q86U78	7166 // cell surface receptor linked signal transduction // Unknown /// 7267 // cell-cell signaling // Unknown /// 7565 // pregnancy // Unknown /// 8217 // regulation of blood pressure // Unknown	5576 // extracellular region // Unknown /// 5625 // soluble fraction // Unknown	4867 // serine-type endopeptidase inhibitor activity // Unknown /// 5179 // hormone activity // Unknown	chr1:227145019-227156602 (-) // 99.9 // q42.2	ACE-Inhibitor_pathway_PharmGKB // GenMAPP
238041_at	---	Transcribed locus	AA151712	---	---	---	---	---	---	chr15:55368742-55369406 (+) // 45.2 // q21.3	---
206435_at	GALGT	UDP-N-acetyl-alpha-D-galactosamine:(N-acetylneuraminyl)-galactosylglucosylceramide N-acetylgalactosaminyltransferase (GalNAc-T)	NM_001478	2583	601873	Q00973 /// Q6ZSG9 /// Q8N636	5975 // carbohydrate metabolism // Unknown /// 6687 // glycosphingolipid metabolism // Unknown /// 30259 // lipid glycosylation // Unknown	5624 // membrane fraction // Unknown /// 5794 // Golgi apparatus // Unknown /// 30173 // integral to Golgi membrane // Unknown	3947 // (N-acetylneuraminyl)-galactosylglucosylceramide N-acetylgalactosaminyltransferase activity // Unknown /// 16758 // transferase activity, transferring hexosyl groups // Unknown	chr12:56305944-56313251 (-) // 99.83 // q14.1	Ganglioside biosynthesis // KEGG
215828_at	ATBF1	AT-binding transcription factor 1	AL359599	463	104155	Q15911 /// Q15912 /// Q8N2Y6	6355 // regulation of transcription, DNA-dependent // Unknown	5634 // nucleus // Unknown	3705 // RNA polymerase II transcription factor activity, enhancer binding // Unknown /// 8270 // zinc ion binding // Unknown	chr16:71473571-71475885 (-) // 96.1 // q22.3	---
231156_at	HAO2	Hydroxyacid oxidase 2 (long chain)	AW242782	51179	605176	Q9NYQ3	1561 // fatty acid alpha-oxidation // Unknown /// 6118 // electron transport // Unknown	5777 // peroxisome // Unknown	3973 // (S)-2-hydroxy-acid oxidase activity // Unknown /// 16491 // oxidoreductase activity // Unknown	chr1:119639912-119640694 (+) // 85.55 // p12	Glyoxylate and dicarboxylate metabolism // KEGG
206628_at	SLC5A1	solute carrier family 5 (sodium/glucose cotransporter), member 1	NM_000343	6523	182380 /// 606824	P13866	6810 // transport // Unknown /// 6814 // sodium ion transport // Unknown /// 7587 // sugar utilization // Unknown	5887 // integral to plasma membrane // Unknown	5215 // transporter activity // Unknown /// 5351 // sugar porter activity // Unknown /// 5412 // glucose:sodium symporter activity // Unknown /// 15293 // symporter activity // Unknown	chr22:30763812-30831199 (+) // 99.96 // q12.3	---
235002_at	NUDT16	nudix (nucleoside diphosphate linked moiety X)-type motif 16	BE780834	131870	---	Q96DE0 /// Q96N82	---	---	---	chr3:132583319-132586151 (+) // 59.31 // q21.3	---
241763_s_at	FBXO32	F-box protein 32	BF244402	114907	606604	Q969P5 /// Q8TC93	6512 // ubiquitin cycle // Unknown	---	---	chr8:124608281-124608895 (-) // 42.32 // q24.13	---
230535_s_at	---	---	BF109387	---	---	---	---	---	---	chr20:57033917-57034372 (-) // 98.91 // q13.32	---
244430_at	---	---	BF111222	---	---	---	---	---	---	chr17:17046907-17050221 (+) // 97.11 // p11.2	---
239233_at	KIAA1212	KIAA1212	AA744613	55704	---	O14997 /// Q6DCA5 /// Q6PAV0 /// Q7Z3C5 /// Q9NW05 /// Q9UI01 /// Q9ULK8 /// Q7Z339 /// Q5HYD0	---	16020 // membrane // Unknown	---	chr2:55432960-55433407 (-) // 82.02 // p16.1	---
215901_at	ZNF81	zinc finger protein 81 (HFZ20)	X68011	347344	300498 /// 314998	P51508 /// Q6ZT36	6355 // regulation of transcription, DNA-dependent // Unknown	5634 // nucleus // Unknown	3700 // transcription factor activity // Unknown /// 8270 // zinc ion binding // Unknown	chrX:47531271-47532285 (+) // 100.0 // p11.23	---
203065_s_at	CAV1	caveolin 1, caveolae protein, 22kDa	NM_001753	857	601047	Q03135 /// Q7Z4F3	---	5887 // integral to plasma membrane // Unknown /// 16599 // caveolar membrane // Unknown	5198 // structural molecule activity // Unknown	chr7:115759042-115793558 (+) // 99.4 // q31.2	Integrin-mediated_cell_adhesion_KEGG // GenMAPP
1568366_at	---	---	AJ012497	---	---	---	---	---	---	---	---
242953_at	---	Transcribed locus, weakly similar to XP_498467.1 hypothetical gene supported by NM_194304 [Homo sapiens]	BE909177	---	---	---	---	---	---	chr19:49354511-49355397 (+) // 58.2 // q13.31	---
1566727_at	---	MRNA; cDNA DKFZp313P1923 (from clone DKFZp313P1923)	AL832082	---	---	---	---	---	---	chr7:131431852-131433891 (+) // 62.83 // q32.3	---
1556711_at	FLJ40919	hypothetical protein FLJ40919	AK098238	144809	---	Q8N7L0	---	---	---	chr13:42253735-42263682 (+) // 78.78 // q14.11	---
234392_at	---	---	X60485	---	---	---	---	---	---	chr6:27882800-27883094 (+) // 99.66 // p22.1	---
1556920_s_at	---	CDNA FLJ36036 fis, clone TESTI2017125	AK093355	---	---	---	---	---	---	chr3:169096446-169123465 (+) // 98.35 // q26.1	---
228844_at	SLC13A5	solute carrier family 13 (sodium-dependent citrate transporter), member 5	AI797218	284111	608305	Q68D44 /// Q6ZMG1 /// Q6ZMG6 /// Q6ZNH7 /// Q86YT5 /// Q8IV67	6814 // sodium ion transport // Unknown	16020 // membrane // Unknown	5215 // transporter activity // Unknown	chr17:6528757-6530303 (-) // 97.48 // p13.1	---
226410_at	LOC348180	hypothetical protein LOC348180	R60020	348180	---	Q92508 /// Q66K78 /// Q6P4C8 /// Q86SV4 /// Q8N7P5 /// Q96HU3	---	---	---	chr16:87300418-87309285 (+) // 94.25 // q24.3	---
214651_s_at	HOXA9	homeo box A9	U41813	3205	142956	P31269	6350 // transcription // Unknown /// 6355 // regulation of transcription, DNA-dependent // Unknown /// 7275 // development // Unknown	5634 // nucleus // Unknown	3700 // transcription factor activity // Unknown /// 16563 // transcriptional activator activity // Unknown	chr7:26975459-26982509 (-) // 94.7 // p15.2	---
214899_at	LOC163131	hypothetical BC331191_1	AC007842	163131	---	---	6355 // regulation of transcription, DNA-dependent // Unknown	5634 // nucleus // Unknown	3677 // DNA binding // Unknown /// 8270 // zinc ion binding // Unknown	chr19:45232103-45288604 (-) // 99.14 // q13.2	---
200800_s_at	HSPA1A /// HSPA1B	heat shock 70kDa protein 1A /// heat shock 70kDa protein 1B	NM_005345	3303 /// 3304	140550 /// 603012	P68104 /// P08107	6457 // protein folding // Unknown /// 6986 // response to unfolded protein // Unknown /// 6402 // mRNA catabolism // Unknown	5634 // nucleus // Unknown /// 5737 // cytoplasm // Unknown	5524 // ATP binding // Unknown /// 51082 // unfolded protein binding // Unknown	chr6:31891315-31893702 (+) // 99.83 // p21.33 /// chr6:31903511-31905640 (+) // 87.93 // p21.33	---
225045_at	KIAA1212	KIAA1212	AB033038	55704	---	O14997 /// Q6DCA5 /// Q6PAV0 /// Q7Z3C5 /// Q9NW05 /// Q9UI01 /// Q9ULK8 /// Q7Z339 /// Q5HYD0	---	16020 // membrane // Unknown	---	chr2:55426628-55467342 (-) // 98.21 // p16.1	---
1560695_at	QTRTD1	Queuine tRNA-ribosyltransferase domain containing 1	AL832215	79691	---	Q6IA59 /// Q9H974	8033 // tRNA processing // Unknown /// 8616 // queuosine biosynthesis // Unknown	---	8479 // queuine tRNA-ribosyltransferase activity // Unknown /// 16757 // transferase activity, transferring glycosyl groups // Unknown	chr3:115267781-115281075 (+) // 63.68 // q13.31	---
230030_at	HS6ST2	heparan sulfate 6-O-sulfotransferase 2	AI767756	90161	---	Q6PIC4 /// Q8N3T4 /// Q8NBN4 /// Q96MM7 /// Q9Y3P2 /// Q86SM9 /// Q96SJ4	---	---	16740 // transferase activity // Unknown	chrX:131485577-131486232 (-) // 95.34 // q26.2	---
1552767_a_at	hs6st2	heparan sulfate 6-O-sulfotransferase 2	NM_147174	90161	---	Q6PIC4 /// Q8N3T4 /// Q8NBN4 /// Q96MM7 /// Q9Y3P2 /// Q86SM9 /// Q96SJ4	---	---	16740 // transferase activity // Unknown	chrX:131485578-131816891 (-) // 89.03 // q26.2	---
201107_s_at	THBS1	thrombospondin 1	AI812030	7057	188060	P07996	6928 // cell motility // Unknown /// 7155 // cell adhesion // Unknown /// 7275 // development // Unknown /// 7399 // neurogenesis // Unknown /// 7596 // blood coagulation // Unknown	5576 // extracellular region // Unknown	4866 // endopeptidase inhibitor activity // Unknown /// 4871 // signal transducer activity // Unknown /// 5198 // structural molecule activity // Unknown /// 5509 // calcium ion binding // Unknown /// 5515 // protein binding // Unknown /// 8201 // heparin binding // Unknown	chr15:37660425-37676960 (+) // 97.77 // q14	TGF_Beta_Signaling_Pathway // GenMAPP /// Inflammatory_Response_Pathway // GenMAPP
1552766_at	HS6ST2	heparan sulfate 6-O-sulfotransferase 2	NM_147174	90161	---	Q6PIC4 /// Q8N3T4 /// Q8NBN4 /// Q96MM7 /// Q9Y3P2 /// Q86SM9 /// Q96SJ4	---	---	16740 // transferase activity // Unknown	chrX:131485578-131816891 (-) // 89.03 // q26.2	---
206277_at	P2RY2	purinergic receptor P2Y, G-protein coupled, 2	NM_002564	5029	600041	P41231	6873 // cell ion homeostasis // Unknown /// 7200 // G-protein signaling, coupled to IP3 second messenger (phospholipase C activating) // Unknown	5887 // integral to plasma membrane // Unknown	1584 // rhodopsin-like receptor activity // Unknown /// 4872 // receptor activity // Unknown /// 45028 // purinergic nucleotide receptor activity, G-protein coupled // Unknown	chr11:72607087-72624625 (+) // 94.57 // q13.4	GPCRDB_Class_A_Rhodopsin-like // GenMAPP /// Nucleotide_GPCRs // GenMAPP
1555353_at	LRP1	low density lipoprotein-related protein 1 (alpha-2-macroglobulin receptor)	BC045107	4035	107770	Q07954 /// Q6PJ72 /// Q71RG2 /// Q6LBN5 /// Q7Z7K9 /// Q86SW0	6629 // lipid metabolism // Unknown /// 6897 // endocytosis // Unknown /// 8283 // cell proliferation // Unknown	5624 // membrane fraction // Unknown /// 5887 // integral to plasma membrane // Unknown /// 5905 // coated pit // Unknown	4872 // receptor activity // Unknown /// 5319 // lipid transporter activity // Unknown /// 5509 // calcium ion binding // Unknown /// 8034 // lipoprotein binding // Unknown	chr12:55808765-55830108 (+) // 99.18 // q13.3	Statin_Pathway_PharmGKB // GenMAPP
1564777_at	HYALP1	hyaluronoglucosaminidase pseudogene 1	AF149304	26062	---	---	---	---	---	chr7:123048143-123053435 (+) // 100.0 // q31.33	---
234455_at	ZFP1	zinc finger protein 1 homolog (mouse)	AL133038	162239	---	Q6P2D0 /// Q8NB43	6355 // regulation of transcription, DNA-dependent // Unknown	5634 // nucleus // Unknown	3677 // DNA binding // Unknown /// 8270 // zinc ion binding // Unknown	chr16:73740454-73744899 (+) // 28.04 // q22.3	---
1565162_s_at	MGST1	microsomal glutathione S-transferase 1	D16947	4257	138330	P10620 /// Q6LET6	---	5739 // mitochondrion // Unknown /// 5792 // microsome // Unknown /// 16020 // membrane // Unknown	4364 // glutathione transferase activity // Unknown /// 16740 // transferase activity // Unknown	chr12:16391859-16408069 (+) // 88.19 // p12.3	Glutathione metabolism // KEGG
1566969_at	---	---	AF339798	---	---	---	---	---	---	chr13:97686592-97827569 (-) // 17.51 // q32.2	---
213831_at	HLA-DQA1	major histocompatibility complex, class II, DQ alpha 1	X00452	3117	146880	P01909 /// P01907 /// P05536 /// Q6DKG8 /// O19522 /// O19704 /// O19705 /// O19706 /// O19760 /// Q29782 /// Q29876 /// Q29882 /// Q29995 /// Q30062 /// Q30064 /// Q30065 /// Q30066 /// Q30067 /// Q30068 /// Q30071 /// Q30072 /// Q30085 /// Q8MH01 /// Q8MH02 /// Q8MH03 /// Q8MH05 /// Q8MH06 /// Q8MH08 /// Q8MH09 /// Q8MH10 /// Q8MH11 /// Q8MH12 /// Q8MH13 /// Q8MH15 /// Q8MH16 /// Q8MH17 /// Q8M…	6955 // immune response // Unknown /// 19884 // antigen presentation, exogenous antigen // Unknown /// 19886 // antigen processing, exogenous antigen via MHC class II // Unknown	16021 // integral to membrane // Unknown	45012 // MHC class II receptor activity // Unknown	chr6:32713191-32719016 (+) // 95.22 // p21.32	---
229281_at	---	---	N51682	---	---	---	---	---	---	chr14:33342170-33343133 (+) // 97.09 // q13.1	---
244288_s_at	SIX3	Sine oculis homeobox homolog 3 (Drosophila)	BF433916	6496	157170 /// 603714	O95343 /// Q9NSJ2	6355 // regulation of transcription, DNA-dependent // Unknown /// 7275 // development // Unknown /// 7420 // brain development // Unknown /// 7601 // visual perception // Unknown	5634 // nucleus // Unknown	3700 // transcription factor activity // Unknown	chr2:45084219-45084861 (-) // 84.11 // p21	---
221098_x_at	UTP14A	UTP14, U3 small nucleolar ribonucleoprotein, homolog A (yeast)	NM_006649	10813	300508	O60531 /// Q9BVJ6	---	30529 // ribonucleoprotein complex // Unknown	---	chrX:128765711-128780062 (+) // 63.33 // q25	---
213884_s_at	TRIM3	tripartite motif-containing 3	AA114843	10612	605493	O75382 /// Q6ZTE7	7399 // neurogenesis // Unknown /// 16567 // protein ubiquitination // Unknown	151 // ubiquitin ligase complex // Unknown /// 5737 // cytoplasm // Unknown	3676 // nucleic acid binding // Unknown /// 4842 // ubiquitin-protein ligase activity // Unknown /// 8022 // protein C-terminus binding // Unknown /// 8270 // zinc ion binding // Unknown	chr11:6426419-6427843 (-) // 48.45 // p15.4	---
212097_at	CAV1	caveolin 1, caveolae protein, 22kDa	AU147399	857	601047	Q03135 /// Q7Z4F3	---	5887 // integral to plasma membrane // Unknown /// 16599 // caveolar membrane // Unknown	5198 // structural molecule activity // Unknown	chr7:115793472-115795184 (+) // 94.53 // q31.2	Integrin-mediated_cell_adhesion_KEGG // GenMAPP
238280_at	LOC200008	hypothetical protein LOC200008	BF438410	200008	---	Q6ZWJ3 /// Q8NF25 /// Q6IPT4	6118 // electron transport // Unknown	16021 // integral to membrane // Unknown	16491 // oxidoreductase activity // Unknown	chr1:54368245-54368593 (-) // 47.18 // p32.3	---
240668_s_at	---	---	AW967590	---	---	---	---	---	---	chr13:43867761-43868415 (-) // 94.96 // q14.11	---
203372_s_at	SOCS2	suppressor of cytokine signaling 2	AB004903	8835	605117	O14508	1558 // regulation of cell growth // Unknown /// 7242 // intracellular signaling cascade // Unknown /// 9966 // regulation of signal transduction // Unknown /// 40014 // regulation of body size // Unknown /// 45666 // positive regulation of neuron differentiation // Unknown	5737 // cytoplasm // Unknown	5131 // growth hormone receptor binding // Unknown /// 5148 // prolactin receptor binding // Unknown /// 5159 // insulin-like growth factor receptor binding // Unknown	chr12:92469103-92471492 (+) // 100.0 // q22	---
1559119_at	---	---	W01252	---	---	---	---	---	---	chr11:68085326-68086305 (-) // 3.6 // q13.2	---
1560552_a_at	PPP3CA	Protein phosphatase 3 (formerly 2B), catalytic subunit, alpha isoform (calcineurin A alpha)	AL358312	5530	114105	Q08209 /// Q6ZVW1 /// Q8N8A3 /// Q8TAW9 /// Q9UI50 /// Q9UMM5	6470 // protein amino acid dephosphorylation // Unknown	5955 // calcineurin complex // Unknown	4722 // protein serine/threonine phosphatase activity // Unknown /// 5509 // calcium ion binding // Unknown /// 5516 // calmodulin binding // Unknown /// 16787 // hydrolase activity // Unknown	chr4:102575318-102576286 (-) // 97.29 // q24	G_Protein_Signaling // GenMAPP
209728_at	HLA-DRB4	major histocompatibility complex, class II, DR beta 4 /// major histocompatibility complex, class II, DR beta 4	BC005312	3126	---	O19719 /// O19727 /// O19740 /// O19743	6955 // immune response // Unknown /// 7165 // signal transduction // Unknown /// 19884 // antigen presentation, exogenous antigen // Unknown /// 19886 // antigen processing, exogenous antigen via MHC class II // Unknown	5887 // integral to plasma membrane // Unknown /// 16020 // membrane // Unknown /// 16021 // integral to membrane // Unknown	45012 // MHC class II receptor activity // Unknown	---	---
211476_at	MYOZ2	myozenin 2	AY013295	51778	605602	O43415 /// Q9NPC6	---	30017 // sarcomere // Unknown	30346 // protein phosphatase 2B binding // Unknown	chr4:120414623-120466538 (+) // 97.91 // q26	---
205643_s_at	PPP2R2B	protein phosphatase 2 (formerly 2A), regulatory subunit B (PR 52), beta isoform	NM_004576	5521	604325 /// 604326	Q00005	7165 // signal transduction // Unknown	159 // protein phosphatase type 2A complex // Unknown	4721 // phosphoprotein phosphatase activity // Unknown /// 8601 // protein phosphatase type 2A regulator activity // Unknown	chr5:145948133-146238352 (-) // 99.56 // q32	Glycogen_Metabolism // GenMAPP
211928_at	DNCH1	dynein, cytoplasmic, heavy polypeptide 1	AB002323	1778	600112	Q14204 /// Q6P2H7 /// Q9NRC3	7018 // microtubule-based movement // Unknown /// 7052 // mitotic spindle organization and biogenesis // Unknown	5868 // cytoplasmic dynein complex // Unknown	166 // nucleotide binding // Unknown /// 3777 // microtubule motor activity // Unknown /// 5524 // ATP binding // Unknown /// 17111 // nucleoside-triphosphatase activity // Unknown /// 42623 // ATPase activity, coupled // Unknown	chr14:101552916-101587021 (+) // 99.52 // q32.32	---
210403_s_at	KCNJ1	potassium inwardly-rectifying channel, subfamily J, member 1	U12543	3758	241200 /// 600359	P48048	6811 // ion transport // Unknown /// 6813 // potassium ion transport // Unknown /// 7588 // excretion // Unknown	5624 // membrane fraction // Unknown /// 8076 // voltage-gated potassium channel complex // Unknown /// 16021 // integral to membrane // Unknown	5242 // inward rectifier potassium channel activity // Unknown /// 5244 // voltage-gated ion channel activity // Unknown /// 5267 // potassium channel activity // Unknown /// 5524 // ATP binding // Unknown	chr11:128213907-128242417 (-) // 99.88 // q24.3	---
221327_s_at	OPN1MW /// OPN1LW	opsin 1 (cone pigments), medium-wave-sensitive (color blindness, deutan) /// opsin 1 (cone pigments), long-wave-sensitive (color blindness, protan)	NM_000513	2652 /// 5956	303700 /// 303800 /// 303900	Q68CR4	7186 // G-protein coupled receptor protein signaling pathway // Unknown /// 7601 // visual perception // Unknown /// 7602 // phototransduction // Unknown /// 7165 // signal transduction // Unknown	5887 // integral to plasma membrane // Unknown	8020 // G-protein coupled photoreceptor activity // Unknown	chrX:152969013-152982378 (+) // 99.91 // q28 /// chrX:152930604-152945248 (+) // 97.72 // q28 /// chrX:153006131-153017103 (+) // 89.68 // q28	---
237723_at	SMURF1	SMAD specific E3 ubiquitin protein ligase 1	AV661798	57154	605568	Q9HCE7 /// Q6ZTM5 /// Q8NDD8	6512 // ubiquitin cycle // Unknown /// 7398 // ectoderm development // Unknown /// 30154 // cell differentiation // Unknown /// 30514 // negative regulation of BMP signaling pathway // Unknown /// 42787 // protein ubiquitination during ubiquitin-dependent protein catabolism // Unknown	5622 // intracellular // Unknown	4842 // ubiquitin-protein ligase activity // Unknown /// 16874 // ligase activity // Unknown	chr7:98306995-98307493 (+) // 53.39 // q22.1	---
205933_at	SETBP1	SET binding protein 1	NM_015559	26040	---	Q9Y6X0 /// Q6P6C3	---	5634 // nucleus // Unknown	3677 // DNA binding // Unknown	chr18:40535466-40898771 (+) // 98.8 // q12.3	---
1555253_at	COL25A1	collagen, type XXV, alpha 1	BC036669	84570	---	Q9BXS0 /// Q8NE08 /// Q9BXR9	6817 // phosphate transport // Unknown	5737 // cytoplasm // Unknown	5198 // structural molecule activity // Unknown	chr4:110089481-110581123 (-) // 99.1 // q25	---
239647_at	CHST13	carbohydrate (chondroitin 4) sulfotransferase 13	AA677272	166012	---	Q8NET6	---	---	16740 // transferase activity // Unknown	chr3:127744347-127744832 (+) // 99.39 // q21.2	---
207462_at	GLRA2	glycine receptor, alpha 2	NM_002063	2742	305990	P23416	6811 // ion transport // Unknown /// 6821 // chloride transport // Unknown /// 7166 // cell surface receptor linked signal transduction // Unknown /// 7268 // synaptic transmission // Unknown	5887 // integral to plasma membrane // Unknown /// 45211 // postsynaptic membrane // Unknown	4890 // GABA-A receptor activity // Unknown /// 4891 // glycine-inhibited chloride channel activity // Unknown /// 5216 // ion channel activity // Unknown /// 5230 // extracellular ligand-gated ion channel activity // Unknown /// 16934 // glycine-gated chloride channel activity // Unknown /// 30594 // neurotransmitter receptor activity // Unknown	chrX:14307452-14508375 (+) // 99.73 // p22.2	---
1557063_at	DICER1	Dicer1, Dcr-1 homolog (Drosophila)	BC040596	23405	606241	Q9UPY3 /// Q9UFF3	6396 // RNA processing // Unknown /// 30423 // RNA interference, targeting of mRNA for destruction // Unknown	5622 // intracellular // Unknown	3725 // double-stranded RNA binding // Unknown /// 4519 // endonuclease activity // Unknown /// 4525 // ribonuclease III activity // Unknown /// 5524 // ATP binding // Unknown /// 8026 // ATP-dependent helicase activity // Unknown /// 16787 // hydrolase activity // Unknown	chr14:94693777-94697379 (+) // 54.97 // q32.13	mRNA_processing_Reactome // GenMAPP
210982_s_at	HLA-DRA	major histocompatibility complex, class II, DR alpha	M60333	3122	142860	P01903 /// O19720 /// Q29868 /// Q7YPT8 /// Q30118 /// Q9TP70	6955 // immune response // Unknown /// 19884 // antigen presentation, exogenous antigen // Unknown /// 19886 // antigen processing, exogenous antigen via MHC class II // Unknown	5887 // integral to plasma membrane // Unknown /// 16020 // membrane // Unknown	45012 // MHC class II receptor activity // Unknown	chr6:32515678-32519680 (+) // 98.12 // p21.32 /// chr6_hla_hap1:4260-8259 (+) // 98.12 //	---
235881_at	---	---	AW293988	---	---	---	---	---	---	chr2:153017258-153224841 (-) // 94.95 // q23.3	---
241291_at	---	CDNA FLJ36657 fis, clone UTERU2001876	AI922102	---	---	---	---	---	---	chr18:67338179-67338859 (-) // 78.25 // q22.3	---
238846_at	TNFRSF11A	Tumor necrosis factor receptor superfamily, member 11a, activator of NFKB	AW026379	8792	174810 /// 602080 /// 603499	Q9Y6Q6	6955 // immune response // Unknown /// 7165 // signal transduction // Unknown /// 7267 // cell-cell signaling // Unknown /// 7605 // perception of sound // Unknown /// 8284 // positive regulation of cell proliferation // Unknown	16021 // integral to membrane // Unknown	4872 // receptor activity // Unknown	chr18:58205088-58205879 (+) // 99.87 // q21.33	---
226002_at	GAB1	GRB2-associated binding protein 1	AK022142	2549	604439	Q13480 /// Q6P1W2 /// Q8TE87 /// Q9HA84	7173 // epidermal growth factor receptor signaling pathway // Unknown /// 8283 // cell proliferation // Unknown /// 8286 // insulin receptor signaling pathway // Unknown	---	5070 // SH3/SH2 adaptor protein activity // Unknown /// 5515 // protein binding // Unknown	chr4:144717248-144751506 (+) // 99.08 // q31.21	---
228393_s_at	ZNF302	Zinc finger protein 302	BF508739	55900	---	Q9NR11 /// Q6RFS1 /// Q6X7T3 /// Q7Z4B9 /// Q8NC84	6355 // regulation of transcription, DNA-dependent // Unknown	5634 // nucleus // Unknown	3677 // DNA binding // Unknown /// 8270 // zinc ion binding // Unknown	chr19:39864727-39866955 (+) // 84.43 // q13.11	---
203771_s_at	BLVRA	biliverdin reductase A	AA740186	644	109750	P53004	6118 // electron transport // Unknown /// 8152 // metabolism // Unknown	---	4074 // biliverdin reductase activity // Unknown /// 5489 // electron transporter activity // Unknown /// 16491 // oxidoreductase activity // Unknown	chr7:43571346-43620179 (+) // 92.79 // p13	Porphyrin and chlorophyll metabolism // KEGG
218532_s_at	FLJ20152	hypothetical protein FLJ20152	NM_019000	54463	---	Q69YN8 /// Q9H6K6 /// Q9H6L5 /// Q9H764 /// Q9NXM8	---	---	---	chr5:16526165-16528344 (-) // 97.14 // p15.1	---
1557758_at	---	---	BC043242	---	---	---	---	---	---	chr11:105628726-105640842 (+) // 81.52 // q22.3	---
205699_at	MAP2K6	mitogen-activated protein kinase kinase 6	U39657	5608	601254	P52564 /// Q6MZH7	6468 // protein amino acid phosphorylation // Unknown /// 6975 // DNA damage induced protein phosphorylation // Unknown /// 7050 // cell cycle arrest // Unknown /// 7165 // signal transduction // Unknown	---	4674 // protein serine/threonine kinase activity // Unknown /// 4708 // MAP kinase kinase activity // Unknown /// 4713 // protein-tyrosine kinase activity // Unknown /// 5524 // ATP binding // Unknown /// 16740 // transferase activity // Unknown	chr17:64922433-65051067 (+) // 97.33 // q24.3	Integrin-mediated_cell_adhesion_KEGG // GenMAPP /// MAPK_Cascade // GenMAPP
230900_at	KM-HN-1	KM-HN-1 protein	AI949455	256309	---	Q86YI9 /// Q8N7W0 /// Q8TBZ0	---	---	---	chr4:186741489-186754708 (-) // 98.6 // q35.1	---
222269_at	CXorf33	chromosome X open reading frame 33	W87634	139322	---	Q68DW4 /// Q6UXV4	---	---	---	chr5:145356791-145358024 (+) // 90.32 // q32 /// chrX:84107595-84149092 (+) // 97.33 // q21.1	---
242054_s_at	SIX3	Sine oculis homeobox homolog 3 (Drosophila)	AW473656	6496	157170 /// 603714	O95343 /// Q9NSJ2	6355 // regulation of transcription, DNA-dependent // Unknown /// 7275 // development // Unknown /// 7420 // brain development // Unknown /// 7601 // visual perception // Unknown	5634 // nucleus // Unknown	3700 // transcription factor activity // Unknown	chr2:45084403-45084861 (+) // 83.51 // p21	---
1553876_at	SAMD3	sterile alpha motif domain containing 3	NM_152552	154075	---	Q8N6K7 /// Q8NAY1 /// Q8NB96	---	---	---	chr6:130545826-130728238 (-) // 75.69 // q23.1	---
230602_at	ACMSD	aminocarboxymuconate semialdehyde decarboxylase	AW025340	130013	608889	Q8TDX5 /// Q6ZV40	8152 // metabolism // Unknown /// 46874 // quinolinate metabolism // Unknown	5829 // cytosol // Unknown	1760 // aminocarboxymuconate-semialdehyde decarboxylase activity // Unknown /// 16829 // lyase activity // Unknown	chr2:135463804-135493377 (+) // 99.61 // q21.3	Tryptophan metabolism // KEGG
240118_at	SNN	Stannin	AI401105	8303	603032	O75324	6950 // response to stress // Unknown /// 9628 // response to abiotic stimulus // Unknown	16021 // integral to membrane // Unknown	---	chr16:11707053-11707626 (-) // 99.65 // p13.13	---
234261_at	EB-1	E2a-Pbx1-associated protein	AL137313	56899	607815	Q6IVB5 /// Q6NUS4 /// Q6V0K8 /// Q7Z6G6 /// Q7Z6G7 /// Q7Z6G8 /// Q9NRX7 /// Q9Y5K9 /// Q5XLJ0 /// Q8TAP3	---	---	---	chr12:97760396-97763189 (-) // 43.81 // q23.1	---
207293_s_at	AGTR2	angiotensin II receptor, type 2	U16957	186	300034	P50052	6915 // apoptosis // Unknown /// 7186 // G-protein coupled receptor protein signaling pathway // Unknown /// 7610 // behavior // Unknown /// 8217 // regulation of blood pressure // Unknown	5887 // integral to plasma membrane // Unknown	1584 // rhodopsin-like receptor activity // Unknown /// 4860 // protein kinase inhibitor activity // Unknown /// 4945 // angiotensin type II receptor activity // Unknown	chrX:115113915-115116719 (+) // 97.64 // q23	GPCRDB_Class_A_Rhodopsin-like // GenMAPP /// Peptide_GPCRs // GenMAPP /// ACE-Inhibitor_pathway_PharmGKB // GenMAPP
1558103_a_at	TM6SF1	Transmembrane 6 superfamily member 1	AK055438	53346	606562	Q9BZW5 /// Q6P4D7 /// Q8N5N8	---	16021 // integral to membrane // Unknown	---	chr15:81593881-81596691 (-) // 88.63 // q25.2	---
234185_at	MIPOL1	Mirror-image polydactyly 1	AK026823	145282	135750 /// 606850	Q8TD10	---	---	---	chr14:36923389-36925447 (-) // 97.41 // q21.1	---
216518_at	---	MRNA; cDNA DKFZp564E233 (from clone DKFZp564E233)	AL049260	---	---	---	---	---	---	chr3:77269075-77270746 (+) // 73.43 // p12.3	---
200799_at	HSPA1A	heat shock 70kDa protein 1A	NM_005345	3303	140550	P08107	6457 // protein folding // Unknown /// 6986 // response to unfolded protein // Unknown	---	5524 // ATP binding // Unknown	chr6:31891315-31893702 (+) // 99.83 // p21.33 /// chr6:31903511-31905640 (+) // 87.93 // p21.33	---
1568617_a_at	KIAA1543	KIAA1543	BC020431	57662	---	Q8NDF1 /// Q8WZ12 /// Q9P1Y5	---	---	---	chr19:7566787-7589190 (+) // 95.87 // p13.2	---
235373_at	---	---	AI743489	---	---	---	---	---	---	chr12:13023724-13024761 (+) // 83.0 // p13.1	---
1561280_at	LOC284576	hypothetical protein LOC284576	AK090497	284576	---	---	---	---	---	chr1:202074036-202088225 (+) // 64.49 // q32.1	---
1564841_at	---	MRNA; cDNA DKFZp761G0323 (from clone DKFZp761G0323)	AL137425	---	---	---	---	---	---	chr4:46087985-46088808 (-) // 74.82 // p12	---
1556272_a_at	---	---	BC042472	---	---	---	---	---	---	chr11:77935193-77947258 (+) // 50.0 // q14.1	---
212671_s_at	HLA-DQA1 /// HLA-DQA2	major histocompatibility complex, class II, DQ alpha 1 /// major histocompatibility complex, class II, DQ alpha 2	BG397856	3117 /// 3118	146880	P01908 /// P04226 /// P01909 /// P04225 /// P01907 /// P05536 /// Q6DKG8 /// O19522 /// O19704 /// O19705 /// O19706 /// O19760 /// Q29782 /// Q29876 /// Q29882 /// Q29885 /// Q29995 /// Q30062 /// Q30064 /// Q30065 /// Q30066 /// Q30067 /// Q30068 /// Q30069 /// Q30070 /// Q30071 /// Q30072 /// Q30073 /// Q30085 /// Q30125 /// Q8MH01 /// Q8MH02 /// Q8MH03 /// Q8MH05 /// Q8MH06 /// Q8MH07 /// Q8M…	6955 // immune response // Unknown /// 19884 // antigen presentation, exogenous antigen // Unknown /// 19886 // antigen processing, exogenous antigen via MHC class II // Unknown	16021 // integral to membrane // Unknown /// 5887 // integral to plasma membrane // Unknown	45012 // MHC class II receptor activity // Unknown	chr6:32713111-32719435 (+) // 95.34 // p21.32	---
221045_s_at	PER3	period homolog 3 (Drosophila)	NM_016831	8863	603427	P56645 /// Q8TAR6	6355 // regulation of transcription, DNA-dependent // Unknown /// 7165 // signal transduction // Unknown /// 48511 // rhythmic process // Unknown	5634 // nucleus // Unknown	4871 // signal transducer activity // Unknown	chr1:7779028-7839503 (+) // 99.26 // p36.23	---
208986_at	TCF12	transcription factor 12 (HTF4, helix-loop-helix transcription factors 4)	AL559478	6938	600480	Q99081 /// Q7Z3D9 /// Q86TC1 /// Q86VM2	6357 // regulation of transcription from Pol II promoter // Unknown /// 6955 // immune response // Unknown /// 7275 // development // Unknown /// 7517 // muscle development // Unknown	5634 // nucleus // Unknown	3677 // DNA binding // Unknown /// 3702 // RNA polymerase II transcription factor activity // Unknown	chr15:54998142-55368002 (+) // 99.13 // q21.3	---
214414_x_at	HBA2	hemoglobin, alpha 2 /// hemoglobin, alpha 2	T50399	3040	141850	P69905	---	---	---	chr16:163317-163702 (+) // 69.94 // p13.3	---
1564443_at	---	---	AF529010	---	---	---	---	---	---	chr13:49454685-49469587 (-) // 64.28 // q14.2	---
237496_at	PAPSS2	3'-phosphoadenosine 5'-phosphosulfate synthase 2	AI821404	9060	603005	O95340	103 // sulfate assimilation // Unknown /// 1501 // skeletal development // Unknown /// 6139 // nucleobase, nucleoside, nucleotide and nucleic acid metabolism // Unknown	5622 // intracellular // Unknown	4020 // adenylyl-sulfate kinase activity // Unknown /// 4781 // sulfate adenylyltransferase (ATP) activity // Unknown /// 5524 // ATP binding // Unknown /// 16779 // nucleotidyltransferase activity // Unknown	chr10:89438254-89438695 (+) // 45.59 // q23.31	---
232737_s_at	ENPP3	ectonucleotide pyrophosphatase/phosphodiesterase 3	AL157377	5169	602182	---	6796 // phosphate metabolism // Unknown /// 9117 // nucleotide metabolism // Unknown	5887 // integral to plasma membrane // Unknown	3676 // nucleic acid binding // Unknown /// 4519 // endonuclease activity // Unknown /// 4528 // phosphodiesterase I activity // Unknown /// 4551 // nucleotide diphosphatase activity // Unknown /// 16787 // hydrolase activity // Unknown	chr6:132100863-132110251 (+) // 95.25 // q23.2	Purine metabolism // KEGG /// Starch and sucrose metabolism // KEGG /// Riboflavin metabolism // KEGG /// Nicotinate and nicotinamide metabolism // KEGG /// Pantothenate and CoA biosynthesis // KEGG
231048_at	---	Transcribed locus, moderately similar to XP_498452.1 hypothetical gene supported by NM_173697 [Homo sapiens]	BF675806	---	---	---	---	---	---	chr17:40225649-40226350 (-) // 61.18 // q21.31	---
1562009_a_at	---	CDNA FLJ40764 fis, clone TRACH2002954	AI991943	---	---	---	---	---	---	chr12:47959102-47963035 (-) // 27.92 // q13.12	---
206312_at	GUCY2C	guanylate cyclase 2C (heat stable enterotoxin receptor)	NM_004963	2984	601330	P25092	6182 // cGMP biosynthesis // Unknown /// 6468 // protein amino acid phosphorylation // Unknown /// 7168 // receptor guanylyl cyclase signaling pathway // Unknown /// 7242 // intracellular signaling cascade // Unknown	5887 // integral to plasma membrane // Unknown /// 5903 // brush border // Unknown	4383 // guanylate cyclase activity // Unknown /// 4713 // protein-tyrosine kinase activity // Unknown /// 4872 // receptor activity // Unknown /// 5524 // ATP binding // Unknown /// 16829 // lyase activity // Unknown	chr12:14656842-14740696 (-) // 99.68 // p13.1	Purine metabolism // KEGG
226955_at	---	---	H28999	---	---	---	---	---	---	chr5:148692447-148700958 (+) // 99.01 // q32	---
241404_at	EPHA5	EPH receptor A5	AI088104	2044	600004	P54756 /// Q7Z3F2	6468 // protein amino acid phosphorylation // Unknown /// 7169 // transmembrane receptor protein tyrosine kinase signaling pathway // Unknown	16021 // integral to membrane // Unknown	4713 // protein-tyrosine kinase activity // Unknown /// 4872 // receptor activity // Unknown /// 5005 // transmembrane-ephrin receptor activity // Unknown /// 5524 // ATP binding // Unknown /// 16740 // transferase activity // Unknown	chr4:66292099-66292576 (-) // 91.07 // q13.1	---
241762_at	---	---	BF244402	---	---	---	---	---	---	chr8:124608281-124608895 (-) // 42.32 // q24.13	---
242958_x_at	C10orf112	Chromosome 10 open reading frame 112	R40759	340895	---	---	---	16020 // membrane // Unknown	---	chr10:20445674-20445979 (+) // 64.65 // p12.31	---
238520_at	TRERF1	Transcriptional regulating factor 1	BF724270	55809	---	Q6S5B2 /// Q8WYI6 /// Q9NQ72 /// Q9NQ73 /// Q96PN7 /// Q9NUN9	6694 // steroid biosynthesis // Unknown /// 6707 // cholesterol catabolism // Unknown /// 7275 // development // Unknown /// 42592 // homeostasis // Unknown /// 45893 // positive regulation of transcription, DNA-dependent // Unknown /// 46885 // regulation of hormone biosynthesis // Unknown	5634 // nucleus // Unknown	3677 // DNA binding // Unknown /// 3700 // transcription factor activity // Unknown /// 8134 // transcription factor binding // Unknown /// 8270 // zinc ion binding // Unknown /// 8301 // DNA bending activity // Unknown /// 16455 // RNA polymerase II transcription mediator activity // Unknown /// 30374 // ligand-dependent nuclear receptor transcription coactivator activity // Unknown	chr6:42300925-42301883 (-) // 97.32 // p21.1	---
203844_at	VHL	von Hippel-Lindau tumor suppressor	NM_000551	7428	171300 /// 193300 /// 263400 /// 608537	P40337 /// Q6PDA9	122 // negative regulation of transcription from Pol II promoter // Unknown /// 902 // cellular morphogenesis // Unknown /// 6508 // proteolysis and peptidolysis // Unknown /// 6916 // anti-apoptosis // Unknown /// 6950 // response to stress // Unknown /// 8285 // negative regulation of cell proliferation // Unknown /// 16567 // protein ubiquitination // Unknown /// 45597 // positive regulation o…	5634 // nucleus // Unknown /// 5739 // mitochondrion // Unknown /// 5783 // endoplasmic reticulum // Unknown /// 5829 // cytosol // Unknown	8134 // transcription factor binding // Unknown	chr3:10158459-10170826 (+) // 50.95 // p25.3	---
201808_s_at	ENG	endoglin (Osler-Rendu-Weber syndrome 1)	BE732652	2022	131195 /// 187300	P17813 /// Q6ZW21 /// Q96CG0	7155 // cell adhesion // Unknown /// 8015 // circulation // Unknown /// 9887 // organogenesis // Unknown	5887 // integral to plasma membrane // Unknown	5515 // protein binding // Unknown	chr9:127656848-127696538 (-) // 97.91 // q34.11	TGF_Beta_Signaling_Pathway // GenMAPP
1556461_at	KLF12	Kruppel-like factor 12	BE675108	11278	607531	Q9Y4X4 /// Q8WWI3	6357 // regulation of transcription from Pol II promoter // Unknown	5634 // nucleus // Unknown	3700 // transcription factor activity // Unknown /// 3714 // transcription corepressor activity // Unknown /// 8270 // zinc ion binding // Unknown	chr13:73598597-73600043 (-) // 61.27 // q22.1	---
201887_at	IL13RA1	interleukin 13 receptor, alpha 1	NM_001560	3597	300119	P78552 /// Q6ZW70 /// Q96BB4 /// Q9UDY5	7166 // cell surface receptor linked signal transduction // Unknown	5886 // plasma membrane // Unknown /// 5898 // interleukin-13 receptor complex // Unknown /// 16021 // integral to membrane // Unknown	4872 // receptor activity // Unknown /// 4896 // hematopoietin/interferon-class (D200-domain) cytokine receptor activity // Unknown	chrX:117643440-117710378 (+) // 90.81 // q24	---
228099_at	ZNF550	zinc finger protein 550	AI805301	162972	---	Q7Z398 /// Q7Z6D7 /// Q8NE45	6355 // regulation of transcription, DNA-dependent // Unknown	5634 // nucleus // Unknown	3677 // DNA binding // Unknown /// 8270 // zinc ion binding // Unknown	chr19:62745015-62746585 (-) // 45.24 // q13.43	---
229537_at	LMO4	LIM domain only 4	AI694521	8543	603129	P61968	6118 // electron transport // Unknown /// 6355 // regulation of transcription, DNA-dependent // Unknown	---	5489 // electron transporter activity // Unknown /// 5506 // iron ion binding // Unknown /// 8270 // zinc ion binding // Unknown	chr1:87526006-87526625 (+) // 95.02 // p22.3	---
231787_at	SLC25A27	solute carrier family 25, member 27	H94680	9481	---	O95847 /// Q8N518	6091 // generation of precursor metabolites and energy // Unknown /// 6810 // transport // Unknown /// 6839 // mitochondrial transport // Unknown	5739 // mitochondrion // Unknown /// 5743 // mitochondrial inner membrane // Unknown /// 16020 // membrane // Unknown /// 16021 // integral to membrane // Unknown	5215 // transporter activity // Unknown /// 5488 // binding // Unknown	chr6:46728714-46752559 (+) // 98.02 // p12.3	Electron_Transport_Chain // GenMAPP
228555_at	CAMK2D	Calcium/calmodulin-dependent protein kinase (CaM kinase) II delta	AA029441	817	607708	Q13557 /// Q6ZNN9 /// Q8N553 /// Q92991	1558 // regulation of cell growth // Unknown /// 6468 // protein amino acid phosphorylation // Unknown	---	4674 // protein serine/threonine kinase activity // Unknown /// 4685 // calcium- and calmodulin-dependent protein kinase activity // Unknown /// 5516 // calmodulin binding // Unknown /// 5524 // ATP binding // Unknown /// 16301 // kinase activity // Unknown /// 16740 // transferase activity // Unknown	chr4:114729793-114731025 (-) // 65.88 // q26	Calcium_regulation_in_cardiac_cells // GenMAPP /// Smooth_muscle_contraction // GenMAPP
209191_at	TUBB6	tubulin, beta 6	BC002654	84617	---	Q9BUF5	7018 // microtubule-based movement // Unknown /// 46785 // microtubule polymerization // Unknown	45298 // tubulin // Unknown	3924 // GTPase activity // Unknown /// 5198 // structural molecule activity // Unknown /// 5525 // GTP binding // Unknown	chr18:12298256-12316567 (+) // 98.43 // p11.21	---
221386_at	OR3A2	olfactory receptor, family 3, subfamily A, member 2	NM_002551	4995	---	---	7165 // signal transduction // Unknown /// 7186 // G-protein coupled receptor protein signaling pathway // Unknown /// 7608 // perception of smell // Unknown	5887 // integral to plasma membrane // Unknown	4872 // receptor activity // Unknown /// 4984 // olfactory receptor activity // Unknown	chr17:3128013-3128961 (-) // 100.0 // p13.3	---
208894_at	HLA-DRA	major histocompatibility complex, class II, DR alpha /// major histocompatibility complex, class II, DR alpha	M60334	3122	142860	P01903 /// O19720 /// Q29868 /// Q7YPT8 /// Q30118 /// Q9TP70	6955 // immune response // Unknown /// 19884 // antigen presentation, exogenous antigen // Unknown /// 19886 // antigen processing, exogenous antigen via MHC class II // Unknown	5887 // integral to plasma membrane // Unknown /// 16020 // membrane // Unknown	45012 // MHC class II receptor activity // Unknown	---	---
241679_at	AKAP12	A kinase (PRKA) anchor protein (gravin) 12	AI672553	9590	604698	Q02952 /// Q68D82 /// Q6NSG9 /// Q86TJ9 /// Q86TK7	6605 // protein targeting // Unknown /// 7165 // signal transduction // Unknown /// 7186 // G-protein coupled receptor protein signaling pathway // Unknown	5737 // cytoplasm // Unknown	5515 // protein binding // Unknown /// 51018 // protein kinase A binding // Unknown	chr6:151722755-151723222 (+) // 100.0 // q25.1	G_Protein_Signaling // GenMAPP
1553513_at	VNN3	vanin 3	NM_078625	55350	606592	Q9NY84	6807 // nitrogen compound metabolism // Unknown	---	16810 // hydrolase activity, acting on carbon-nitrogen (but not peptide) bonds // Unknown /// 17159 // pantetheinase activity // Unknown	chr6:133091572-133097588 (-) // 88.92 // q23.2	---
1562336_at	CASC2	cancer susceptibility candidate 2	AK055184	255082	608598	Q6XLA1 /// Q8IU53 /// Q8IUI3	---	---	---	chr10:119796494-119805726 (+) // 82.02 // q26.11	---
222342_at	LOC345667	Similar to ADAMTS-10 precursor (A disintegrin and metalloproteinase with thrombospondin motifs 10) (ADAM-TS 10) (ADAM-TS10)	AW979196	345667	---	Q68DL1 /// Q6ZNM4 /// Q96FQ0 /// Q96RT9	---	---	---	chr14:76566159-76808184 (+) // 2.56 // q24.3	---
1563149_at	---	Full length insert cDNA clone YZ90E08	AF086099	---	---	---	---	---	---	chr22:37653014-37653841 (+) // 86.26 // q13.1	---
204670_x_at	HLA-DRB1	major histocompatibility complex, class II, DR beta 1	NM_002125	3123	142857 /// 181000	P04229 /// P13760 /// P13761 /// Q30134 /// Q9TQE0 /// Q30167 /// P20039 /// P79483 /// P01913 /// P01912 /// P01914 /// P13762 /// Q8NEI3 /// Q8TB62 /// Q96HZ9 /// O19190 /// O19507 /// O19517 /// O19585 /// O19586 /// O19721 /// O19725 /// O19730 /// O19742 /// O19762 /// O19763 /// O78042 /// O78117 /// P79552 /// Q13365 /// Q29671 /// Q29673 /// Q29717 /// Q29726 /// Q29755 /// Q29789 /// Q29…	---	---	---	chr6:32654579-32665526 (-) // 91.34 // p21.32 /// chr6:32593226-32606008 (-) // 90.52 // p21.32 /// chr6_hla_hap1:124310-137592 (-) // 98.09 // /// chr6_hla_hap1:60284-73289 (-) // 91.34 // /// chr6_hla_hap2:3666-146280 (-) // 94.8 //	---
213289_at	---	---	BE221922	---	---	---	---	---	---	chrX:84152813-84154466 (+) // 84.43 // q21.1	---
1563480_at	NEDL1	NEDD4-like ubiquitin-protein ligase 1	AL713780	23072	---	Q9HCC7 /// Q76N89	6512 // ubiquitin cycle // Unknown	5622 // intracellular // Unknown	4842 // ubiquitin-protein ligase activity // Unknown	chr7:43135194-43141147 (+) // 75.87 // p13	---
207955_at	CCL27	chemokine (C-C motif) ligand 27	NM_006664	10850	604833	Q9Y4X3 /// Q8N3Y9	6935 // chemotaxis // Unknown /// 6955 // immune response // Unknown /// 7267 // cell-cell signaling // Unknown	5576 // extracellular region // Unknown	8009 // chemokine activity // Unknown	chr9:34651901-34652654 (-) // 99.75 // p13.3	---
241183_at	---	---	BF223181	---	---	---	---	---	---	chr3:111006316-111012398 (+) // 99.57 // q13.13	---
1562278_at	XLHSRF-1	heat shock regulated 1	AL832045	25981	---	O95491 /// Q6ZU48 /// Q86YK7 /// Q8TEJ4 /// Q92863 /// Q9H8E6 /// Q9P2D7 /// Q9UFW6	---	---	---	chr3:52334682-52338578 (+) // 99.01 // p21.1	---
216947_at	---	---	AK022087	---	---	---	---	---	---	chr2:220110362-220116959 (-) // 63.14 // q35 /// chr13:42545904-42546799 (-) // 35.01 // q14.11	---
212999_x_at	---	---	AW276186	---	---	---	---	---	---	---	---
1569064_at	FLJ10634	Hypothetical protein FLJ10634	BC027487	55192	---	Q9NVM6	398 // nuclear mRNA splicing, via spliceosome // Unknown /// 6457 // protein folding // Unknown	---	3676 // nucleic acid binding // Unknown /// 31072 // heat shock protein binding // Unknown /// 51082 // unfolded protein binding // Unknown	chr15:38847402-38851937 (+) // 90.9 // q15.1	---
1553265_at	SLC23A3	solute carrier family 23 (nucleobase transporters), member 3	NM_144712	151295	---	Q6PIS1 /// Q96NA6	6810 // transport // Unknown	16020 // membrane // Unknown	5215 // transporter activity // Unknown	chr2:219854804-219860284 (-) // 79.78 // q35	---
1556182_x_at	DRAP1	DR1-associated protein 1 (negative cofactor 2 alpha)	BC018095	10589	602289	---	6355 // regulation of transcription, DNA-dependent // Unknown	5634 // nucleus // Unknown	3677 // DNA binding // Unknown	chr1_random:196343-198668 (+) // 42.31 // /// chr1_random:215819-216673 (+) // 36.58 // /// chr1:1439068-1442416 (-) // 77.54 // p36.33	---
205048_s_at	PSPH	phosphoserine phosphatase	NM_003832	5723	172480	Q7Z3S5	6564 // L-serine biosynthesis // Unknown /// 8152 // metabolism // Unknown	---	287 // magnesium ion binding // Unknown /// 3824 // catalytic activity // Unknown /// 4647 // phosphoserine phosphatase activity // Unknown /// 16787 // hydrolase activity // Unknown	chr7:55615081-55615583 (+) // 59.71 // p11.2	Glycine, serine and threonine metabolism // KEGG
208223_s_at	ACVR1B	activin A receptor, type IB	NM_020327	91	601300	P36896	6468 // protein amino acid phosphorylation // Unknown /// 7178 // transmembrane receptor protein serine/threonine kinase signaling pathway // Unknown	5887 // integral to plasma membrane // Unknown	4674 // protein serine/threonine kinase activity // Unknown /// 4872 // receptor activity // Unknown /// 5024 // transforming growth factor beta receptor activity // Unknown /// 5524 // ATP binding // Unknown /// 16740 // transferase activity // Unknown	chr12:50631752-50672393 (+) // 91.52 // q13.13	Phosphatidylinositol signaling system // KEGG
1558530_at	---	Homo sapiens, clone IMAGE:5197917, mRNA	BC036868	---	---	Q6ZT65 /// Q6ZUR1 /// Q8N967	---	---	---	chr12:1799955-1816180 (+) // 94.45 // p13.33	---
209480_at	---	---	M16276	---	---	---	---	---	---	---	---
227506_at	SLC16A9	solute carrier family 16 (monocarboxylic acid transporters), member 9	BG401568	220963	---	Q6ZMI2 /// Q6ZTG3 /// Q7RTY1 /// Q9UFH8	6810 // transport // Unknown	16021 // integral to membrane // Unknown	5215 // transporter activity // Unknown	chr10:61080528-61083735 (-) // 86.91 // q21.2	---
241245_at	---	Transcribed locus, moderately similar to NP_055301.1 neuronal thread protein AD7c-NTP [Homo sapiens]	AV647470	---	---	---	---	---	---	chr1:29316543-29316951 (+) // 100.0 // p35.3	---
227478_at	LOC284262	hypothetical protein LOC284262	BF739885	284262	---	---	---	---	---	chr18:40900649-40902473 (+) // 91.42 // q12.3	---
205578_at	ROR2	receptor tyrosine kinase-like orphan receptor 2	NM_004560	4920	113000 /// 268310 /// 602337	Q01974	6468 // protein amino acid phosphorylation // Unknown /// 7165 // signal transduction // Unknown /// 7275 // development // Unknown	5887 // integral to plasma membrane // Unknown	4714 // transmembrane receptor protein tyrosine kinase activity // Unknown /// 4888 // transmembrane receptor activity // Unknown /// 5524 // ATP binding // Unknown /// 16740 // transferase activity // Unknown	chr9:91564443-91791999 (-) // 99.8 // q22.31	---
1563934_at	---	---	AK092271	---	---	---	---	---	---	chr9:126645075-126647506 (-) // 59.14 // q33.3	---
200602_at	APP	amyloid beta (A4) precursor protein (protease nexin-II, Alzheimer disease)	NM_000484	351	104760	P05067 /// Q6P0P4 /// Q8WZ99	6878 // copper ion homeostasis // Unknown /// 6897 // endocytosis // Unknown /// 6915 // apoptosis // Unknown /// 7155 // cell adhesion // Unknown /// 7165 // signal transduction // Unknown /// 8219 // cell death // Unknown	5576 // extracellular region // Unknown /// 5783 // endoplasmic reticulum // Unknown /// 5794 // Golgi apparatus // Unknown /// 5887 // integral to plasma membrane // Unknown /// 5905 // coated pit // Unknown	4867 // serine-type endopeptidase inhibitor activity // Unknown /// 5515 // protein binding // Unknown /// 8201 // heparin binding // Unknown	chr21:26174732-26464956 (-) // 95.14 // q21.3	---
1561291_at	---	---	BC042682	---	---	---	---	---	---	chr7:45750716-45754166 (+) // 50.33 // p13	---
236765_at	---	Transcribed locus, weakly similar to XP_234581.2 immunoglobulin heavy chain (alpha polypeptide) [Rattus norvegicus]	R74199	---	---	---	---	---	---	---	---
1558653_at	LOC339751	hypothetical protein LOC339751	BC040565	339751	---	---	---	---	---	chr2:173887949-173961853 (-) // 77.26 // q31.1	---
226609_at	DCBLD1	discoidin, CUB and LCCL domain containing 1	N22751	285761	---	Q8N8Z6 /// Q68DD5	7155 // cell adhesion // Unknown	16021 // integral to membrane // Unknown	---	chr6:117968801-117977653 (+) // 96.24 // q22.1	---
244329_at	---	---	BF447604	---	---	---	---	---	---	chr12:5505233-5505735 (-) // 71.97 // p13.31	---
244137_at	KIAA0317	KIAA0317	AA227861	9870	---	Q86TS6 /// O15033 /// Q8IYY9	6512 // ubiquitin cycle // Unknown	5622 // intracellular // Unknown	4842 // ubiquitin-protein ligase activity // Unknown	chr14:74210032-74210720 (-) // 99.13 // q24.3	---
206634_at	SIX3	sine oculis homeobox homolog 3 (Drosophila)	NM_005413	6496	157170 /// 603714	O95343 /// Q9NSJ2	6355 // regulation of transcription, DNA-dependent // Unknown /// 7275 // development // Unknown /// 7420 // brain development // Unknown /// 7601 // visual perception // Unknown	5634 // nucleus // Unknown	3700 // transcription factor activity // Unknown	chr2:45080511-45084092 (+) // 77.73 // p21	---
234494_x_at	---	---	AL137501	---	---	---	---	---	---	---	---
237831_x_at	MMAA	Methylmalonic aciduria (cobalamin deficiency) type A	R15084	166785	251100 /// 607481	---	---	5739 // mitochondrion // Unknown	5524 // ATP binding // Unknown	chr4:146925077-146925386 (+) // 93.58 // q31.21	---
223599_at	TRIM6	tripartite motif-containing 6	AF220030	117854	607564	Q9C030 /// Q6P0L0 /// Q68DV4	16567 // protein ubiquitination // Unknown	151 // ubiquitin ligase complex // Unknown	4842 // ubiquitin-protein ligase activity // Unknown /// 8270 // zinc ion binding // Unknown	chr11:5573931-5590757 (+) // 68.95 // p15.4	---
235187_s_at	---	---	AI479328	---	---	---	---	---	---	chr14:59628682-59644637 (-) // 99.37 // q23.1	---
238734_at	---	CDNA FLJ30885 fis, clone FEBRA2004987	BF528429	---	---	---	---	---	---	chr15:18304010-18304763 (+) // 47.54 // q11.2 /// chr9:64648572-64649324 (+) // 50.6 // q12 /// chr9:65575594-65576346 (+) // 54.73 // q12 /// chr14:18126939-18127690 (+) // 56.59 // q11.1 /// chr2:132799166-132799918 (-) // 56.32 // q21.2 /// chr9:64448193-64448945 (-) // 55.26 // q12 /// chr9:67821845-67822597 (-) // 55.13 // q13 /// chr9:65834525-65835277 (-) // 54.99 // q12 /// chr9:67579113-…	---
220664_at	SPRR2C	small proline-rich protein 2C	NM_006518	6702	182269	Q15515	---	5737 // cytoplasm // Unknown	46872 // metal ion binding // Unknown	chr1:149925666-149927042 (-) // 99.85 // q21.3	---
207301_at	EFNA5	ephrin-A5	NM_001962	1946	601535	P52803 /// Q6ZP12	7267 // cell-cell signaling // Unknown /// 7275 // development // Unknown /// 7399 // neurogenesis // Unknown	5615 // extracellular space // Unknown /// 16020 // membrane // Unknown /// 46658 // anchored to plasma membrane // Unknown	46875 // ephrin receptor binding // Unknown	chr5:106744249-107034495 (-) // 99.94 // q21.3	---
236203_at	---	Transcribed locus	AI377755	---	---	---	---	---	---	chr6:32722359-32722817 (+) // 22.38 // p21.32	---
239620_at	FLJ25439	hypothetical protein FLJ25439	AA778616	153657	---	Q6PF05 /// Q6RGS4 /// Q8IYZ1 /// Q8N7R3 /// Q96LJ2	---	---	5488 // binding // Unknown	chr5:34902885-34935322 (+) // 76.96 // p13.2	---
243023_at	---	Transcribed locus	N34402	---	---	---	---	---	---	chr4:83623203-83623557 (-) // 99.72 // q21.22	---
230284_at	MYOM3	myomesin family, member 3	BF108688	127294	---	Q6AWC0 /// Q6AWC1 /// Q6ZRG7 /// Q6ZU56 /// Q7Z3G9 /// Q8NA11 /// Q96C54 /// Q6NXF9	---	---	---	chr1:24129262-24134973 (-) // 100.0 // p36.11	---
1553084_at	STARD6	START domain containing 6	NM_139171	147323	607051	P59095	6869 // lipid transport // Unknown	---	8289 // lipid binding // Unknown	chr18:50105059-50134941 (-) // 100.0 // q21.2	---
1556484_at	FLJ25811	FLJ25811 protein	AK098677	440699	---	Q8N7C0	---	5578 // extracellular matrix (sensu Metazoa) // Unknown	---	chr1:162244901-162264856 (+) // 99.56 // q23.3	---
238700_at	PIAS2	Protein inhibitor of activated STAT, 2	AI825302	9063	603567	O75928	6355 // regulation of transcription, DNA-dependent // Unknown /// 6512 // ubiquitin cycle // Unknown /// 7275 // development // Unknown	5634 // nucleus // Unknown	3677 // DNA binding // Unknown /// 8270 // zinc ion binding // Unknown	chr18:42644228-42644884 (-) // 98.34 // q21.1	---
205222_at	EHHADH	enoyl-Coenzyme A, hydratase/3-hydroxyacyl Coenzyme A dehydrogenase	NM_001966	1962	607037	Q08426	6091 // generation of precursor metabolites and energy // Unknown /// 6631 // fatty acid metabolism // Unknown /// 8152 // metabolism // Unknown	5777 // peroxisome // Unknown	3857 // 3-hydroxyacyl-CoA dehydrogenase activity // Unknown /// 4165 // dodecenoyl-CoA delta-isomerase activity // Unknown /// 4300 // enoyl-CoA hydratase activity // Unknown /// 16491 // oxidoreductase activity // Unknown /// 16829 // lyase activity // Unknown /// 16853 // isomerase activity // Unknown	chr3:186391115-186454518 (-) // 86.32 // q27.2	Mitochondrial_fatty_acid_betaoxidation // GenMAPP /// Fatty acid biosynthesis (path 2) // KEGG /// Fatty acid metabolism // KEGG /// Valine, leucine and isoleucine degradation // KEGG /// Lysine degradation // KEGG /// Tryptophan metabolism // KEGG /// beta-Alanine metabolism // KEGG /// Benzoate degradation via CoA ligation // KEGG /// Propanoate metabolism // KEGG /// Butanoate metabolism // KE…
243580_at	GNA14	Guanine nucleotide binding protein (G protein), alpha 14	BG537516	9630	604397	O95837	6471 // protein amino acid ADP-ribosylation // Unknown /// 7165 // signal transduction // Unknown /// 7186 // G-protein coupled receptor protein signaling pathway // Unknown	5834 // heterotrimeric G-protein complex // Unknown /// 5886 // plasma membrane // Unknown	3924 // GTPase activity // Unknown /// 4871 // signal transducer activity // Unknown /// 5525 // GTP binding // Unknown	chr9:77267066-77268028 (-) // 95.43 // q21.2	G_Protein_Signaling // GenMAPP
230214_at	MRVI1	murine retrovirus integration site 1 homolog	AL044056	10335	604673	Q8N6V7 /// Q9UNY1 /// Q9Y6F6	---	5789 // endoplasmic reticulum membrane // Unknown	---	chr11:10553882-10554448 (-) // 97.41 // p15.4	---
1555940_a_at	---	Homo sapiens, clone IMAGE:4826868, mRNA	BG198711	---	---	---	---	---	---	chr17:61839262-61843430 (-) // 66.81 // q24.2	---
1557803_at	DTNA	Dystrobrevin, alpha	AF086074	1837	601239 /// 604169 /// 606617	Q9Y4J8 /// Q9BS59	6941 // striated muscle contraction // Unknown /// 7165 // signal transduction // Unknown /// 7274 // neuromuscular synaptic transmission // Unknown	45202 // synapse // Unknown	5509 // calcium ion binding // Unknown /// 5515 // protein binding // Unknown /// 8270 // zinc ion binding // Unknown	chr18:30376077-30376632 (+) // 98.23 // q12.1	---
208923_at	CYFIP1	cytoplasmic FMR1 interacting protein 1	BC005097	23191	606322	Q14467 /// Q9BVC7 /// Q6ZSX1 /// Q7L576	---	---	---	chr15:20444176-20555043 (+) // 99.54 // q11.2	---
221033_s_at	RNF17	ring finger protein 17 /// ring finger protein 17	NM_031277	56163	605793	Q9BXT8	16567 // protein ubiquitination // Unknown	151 // ubiquitin ligase complex // Unknown	3676 // nucleic acid binding // Unknown /// 4842 // ubiquitin-protein ligase activity // Unknown /// 8270 // zinc ion binding // Unknown	chr13:24236338-24296512 (+) // 94.23 // q12.12	---
241770_x_at	---	---	R99105	---	---	---	---	---	---	chr11:62935309-62935946 (+) // 48.83 // q12.3	---
238178_at	---	---	BF110268	---	---	---	---	---	---	chr1:56668686-56669141 (-) // 35.56 // p32.2	---
206529_x_at	SLC26A4	solute carrier family 26, member 4	NM_000441	5172	274600 /// 600791 /// 603545 /// 605646	O43511	6810 // transport // Unknown /// 7605 // perception of sound // Unknown /// 8272 // sulfate transport // Unknown	16021 // integral to membrane // Unknown	8271 // sulfate porter activity // Unknown /// 15108 // chloride transporter activity // Unknown /// 15111 // iodide transporter activity // Unknown	chr7:106895030-106952201 (+) // 91.74 // q22.3	---
238868_at	---	Transcribed locus, moderately similar to NP_055301.1 neuronal thread protein AD7c-NTP [Homo sapiens]	AW264269	---	---	---	---	---	---	chr15:68733948-68734526 (-) // 98.13 // q23	---
33322_i_at	SFN	stratifin	X57348	2810	601290	P31947 /// Q6FH51 /// Q96DH0	74 // regulation of cell cycle // Unknown /// 6469 // negative regulation of protein kinase activity // Unknown /// 7165 // signal transduction // Unknown /// 8283 // cell proliferation // Unknown	5615 // extracellular space // Unknown /// 5737 // cytoplasm // Unknown	8426 // protein kinase C inhibitor activity // Unknown /// 19904 // protein domain specific binding // Unknown	chr1:26873790-26875089 (+) // 58.96 // p36.11	Calcium_regulation_in_cardiac_cells // GenMAPP /// Smooth_muscle_contraction // GenMAPP
1562550_at	PITPNM2	Phosphatidylinositol transfer protein, membrane-associated 2	AK097868	57605	608920	Q9BZ72 /// Q9P271 /// Q9UF51	6810 // transport // Unknown /// 8152 // metabolism // Unknown	5622 // intracellular // Unknown /// 16021 // integral to membrane // Unknown	5509 // calcium ion binding // Unknown /// 46872 // metal ion binding // Unknown	chr12:122030934-122033197 (-) // 81.08 // q24.31	---
1556095_at	UNC13C	unc-13 homolog C (C. elegans)	AL834407	145790	---	Q8NB66 /// Q6ZT32	6887 // exocytosis // Unknown /// 7242 // intracellular signaling cascade // Unknown	19717 // synaptosome // Unknown	19992 // diacylglycerol binding // Unknown	chr15:52314519-52708095 (+) // 98.68 // q21.3	---
1557790_at	---	Homo sapiens, clone IMAGE:5273123, mRNA	BC031306	---	---	---	---	---	---	---	---
203498_at	DSCR1L1	Down syndrome critical region gene 1-like 1	NM_005822	10231	604876	Q14206 /// Q86YJ0 /// Q8N116	7417 // central nervous system development // Unknown /// 19722 // calcium-mediated signaling // Unknown	---	30346 // protein phosphatase 2B binding // Unknown	chr6:46296433-46401364 (-) // 99.53 // p21.1	---
215001_s_at	GLUL	glutamate-ammonia ligase (glutamine synthase)	AL161952	2752	138290	P15104 /// Q7Z3W4 /// Q8IZ17 /// Q9NSP3	1505 // regulation of neurotransmitter levels // Unknown /// 6542 // glutamine biosynthesis // Unknown /// 9399 // nitrogen fixation // Unknown	---	4356 // glutamate-ammonia ligase activity // Unknown /// 16874 // ligase activity // Unknown	chr1:179083686-179089959 (-) // 95.85 // q25.3	Glutamate metabolism // KEGG /// Peptidoglycan biosynthesis // KEGG /// Nitrogen metabolism // KEGG
1556181_at	DRAP1	DR1-associated protein 1 (negative cofactor 2 alpha)	BC018095	10589	602289	---	6355 // regulation of transcription, DNA-dependent // Unknown	5634 // nucleus // Unknown	3677 // DNA binding // Unknown	chr1_random:196343-198668 (+) // 42.31 // /// chr1_random:215819-216673 (+) // 36.58 // /// chr1:1439068-1442416 (-) // 77.54 // p36.33	---
238741_at	BJ-TSA-9	hypothetical protein MGC14128	BE157240	84985	---	Q71HL2 /// Q86UY5 /// Q8N7I1 /// Q96I47	---	---	---	chr8:124290367-124290960 (+) // 88.06 // q24.13	---
214442_s_at	PIAS2	protein inhibitor of activated STAT, 2	AF077953	9063	603567	O75928	6355 // regulation of transcription, DNA-dependent // Unknown /// 6512 // ubiquitin cycle // Unknown /// 7275 // development // Unknown	5634 // nucleus // Unknown	3677 // DNA binding // Unknown /// 8270 // zinc ion binding // Unknown	chr18:42652170-42751464 (-) // 95.94 // q21.1	---
1557733_a_at	---	MRNA; cDNA DKFZp667K2218 (from clone DKFZp667K2218)	AI125308	---	---	---	---	---	---	chr1:236193232-236208407 (-) // 68.14 // q43	---
206439_at	DSPG3	dermatan sulfate proteoglycan 3	NM_004950	1833	601657	Q99645	7565 // pregnancy // Unknown	5578 // extracellular matrix (sensu Metazoa) // Unknown	5539 // glycosaminoglycan binding // Unknown	chr12:89859933-89901275 (-) // 97.32 // q21.33	---
220084_at	C14orf105	chromosome 14 open reading frame 105	NM_018168	55195	---	Q9NVL8	---	---	---	chr14:57006347-57030323 (-) // 66.99 // q22.3	---
1569921_at	ADK	Adenosine kinase	BC037826	132	102750	P55263 /// Q86U79	6166 // purine ribonucleoside salvage // Unknown /// 9156 // ribonucleoside monophosphate biosynthesis // Unknown	---	287 // magnesium ion binding // Unknown /// 4001 // adenosine kinase activity // Unknown /// 16301 // kinase activity // Unknown /// 16740 // transferase activity // Unknown	chr10:75715378-75717225 (+) // 46.29 // q22.2	Purine metabolism // KEGG
235433_at	CXorf33	Chromosome X open reading frame 33	BG290639	139322	---	Q68DW4 /// Q6UXV4	---	---	---	chrX:84150472-84151134 (+) // 60.82 // q21.1	---
242784_at	ETS2	V-ets erythroblastosis virus E26 oncogene homolog 2 (avian)	AV646177	2114	164740	P15036	1501 // skeletal development // Unknown /// 6355 // regulation of transcription, DNA-dependent // Unknown	5634 // nucleus // Unknown	3700 // transcription factor activity // Unknown	chr21:39101034-39101995 (-) // 95.35 // q22.2	Smooth_muscle_contraction // GenMAPP
237857_at	---	Transcribed locus	AV650485	---	---	---	---	---	---	chr8:102254575-102255155 (-) // 59.01 // q22.3	---
203695_s_at	DFNA5	deafness, autosomal dominant 5	NM_004403	1687	600994	O60443	7605 // perception of sound // Unknown	---	---	chr7:24511214-24570603 (-) // 99.42 // p15.3	---
1552424_at	KLHL10	kelch-like 10 (Drosophila)	NM_152467	317719	608778	Q6JEL2	---	---	5515 // protein binding // Unknown	chr17:37247581-37258124 (+) // 98.96 // q21.2	---
1570246_at	---	Homo sapiens, clone IMAGE:4778480, mRNA	BC028967	---	---	---	---	---	---	chr1:95970108-95971081 (+) // 66.49 // p21.3	---
220377_at	KIAA0125	KIAA0125	NM_014151	9834	---	Q14138 /// Q9NZY2	---	---	---	chr14:105427024-105459570 (+) // 41.43 // q32.33	---
226397_s_at	---	---	BG502771	---	---	---	---	---	---	chr6:13397038-13398694 (+) // 94.42 // p24.1	---
228806_at	RORC	RAR-related orphan receptor C	AI218580	6097	602943	P51449	6355 // regulation of transcription, DNA-dependent // Unknown	5634 // nucleus // Unknown	3700 // transcription factor activity // Unknown /// 3707 // steroid hormone receptor activity // Unknown	chr1:148591621-148592055 (-) // 90.42 // q21.3	Nuclear_Receptors // GenMAPP
212062_at	ATP9A	ATPase, Class II, type 9A	AB014511	10079	609126	O75110 /// Q6ZMF3 /// Q96B35	6812 // cation transport // Unknown /// 8152 // metabolism // Unknown	16021 // integral to membrane // Unknown	287 // magnesium ion binding // Unknown /// 4012 // phospholipid-translocating ATPase activity // Unknown /// 5524 // ATP binding // Unknown /// 16787 // hydrolase activity // Unknown /// 16887 // ATPase activity // Unknown	chr20:49646460-49818274 (-) // 98.9 // q13.2	---
216133_at	---	T cell receptor V-alpha 23 precursor (TCRA)	AA284903	---	---	---	---	---	---	chr14:21590568-22086346 (+) // 99.8 // q11.2	---
218952_at	PCSK1N	proprotein convertase subtilisin/kexin type 1 inhibitor	NM_013271	27344	300399	Q9UHG2	---	5615 // extracellular space // Unknown /// 5625 // soluble fraction // Unknown	4866 // endopeptidase inhibitor activity // Unknown /// 5102 // receptor binding // Unknown	chrX:48445758-48450209 (-) // 88.34 // p11.23	---
232015_at	LOC150946	hypothetical protein LOC150946	AV751887	150946	---	Q75VX8 /// Q8NF27 /// Q9UIK8	---	---	---	chr2:26320707-26323869 (+) // 97.4 // p23.3	---
1561486_at	---	MRNA; cDNA DKFZp666M193 (from clone DKFZp666M193)	AL832995	---	---	---	---	---	---	chr18:113610-115166 (+) // 49.68 // p11.32 /// chr18:16780866-16782426 (-) // 55.9 // q11.1	---
208155_x_at	GAGE4 /// GAGE5 /// GAGE6 /// GAGE7B	G antigen 4 /// G antigen 5 /// G antigen 6 /// G antigen 7B	NM_001476	2576 /// 2577 /// 2578 /// 26748	604246 /// 604247 /// 604248	Q13068 /// Q13069 /// Q13070 /// O76087	---	---	---	chrX:49028690-49036016 (+) // 91.84 // p11.23 /// chrX:49038248-49045565 (+) // 91.84 // p11.23 /// chrX:49000025-49007349 (+) // 91.65 // p11.23 /// chrX:49009581-49016905 (+) // 91.65 // p11.23 /// chrX:49019137-49026457 (+) // 91.65 // p11.23 /// chrX:48934921-48942231 (+) // 91.46 // p11.23 /// chrX:49047797-49055112 (+) // 91.46 // p11.23 /// chrX:48944465-49064664 (+) // 90.89 // p11.23 ///…	---
39835_at	SBF1	SET binding factor 1	U93181	6305	603560	O95248 /// Q68CX1 /// Q6PGN5 /// Q86TK5	6470 // protein amino acid dephosphorylation // Unknown /// 46839 // phospholipid dephosphorylation // Unknown	5634 // nucleus // Unknown /// 16021 // integral to membrane // Unknown	4437 // inositol or phosphatidylinositol phosphatase activity // Unknown /// 8138 // protein tyrosine/serine/threonine phosphatase activity // Unknown	chr1:11872103-11875076 (+) // 43.44 // p36.22	---
211612_s_at	IL13RA1	interleukin 13 receptor, alpha 1 /// interleukin 13 receptor, alpha 1	U62858	3597	300119	P78552 /// Q6ZW70 /// Q96BB4 /// Q9UDY5	7166 // cell surface receptor linked signal transduction // Unknown	5886 // plasma membrane // Unknown /// 5898 // interleukin-13 receptor complex // Unknown /// 16021 // integral to membrane // Unknown	4872 // receptor activity // Unknown /// 4896 // hematopoietin/interferon-class (D200-domain) cytokine receptor activity // Unknown	chrX:117643452-117707853 (+) // 91.6 // q24	---
204301_at	KIAA0711	KIAA0711 gene product	NM_014867	9920	---	O94819	---	---	5515 // protein binding // Unknown	chr8:1909450-1942509 (+) // 97.06 // p23.3	---
228027_at	GPRASP2	G protein-coupled receptor associated sorting protein 2	BF732712	114928	---	Q8N8W9 /// Q8NAB4 /// Q96D09	---	---	4872 // receptor activity // Unknown	chrX:101777794-101778804 (+) // 98.04 // q22.1	---
237755_s_at	---	---	AW673231	---	---	---	---	---	---	chr17:9486931-9487327 (-) // 96.46 // p13.1	---
206679_at	APBA1	amyloid beta (A4) precursor protein-binding, family A, member 1 (X11)	NM_001163	320	602414	Q02410	6461 // protein complex assembly // Unknown /// 6886 // intracellular protein transport // Unknown /// 7155 // cell adhesion // Unknown /// 7268 // synaptic transmission // Unknown /// 7399 // neurogenesis // Unknown /// 8088 // axon cargo transport // Unknown	8021 // synaptic vesicle // Unknown	5515 // protein binding // Unknown	chr9:69274755-69516751 (-) // 95.58 // q21.11	---
229764_at	FLJ41238	FLJ41238 protein	AW629527	285386	---	Q6ZUI0 /// Q9BZK4	---	---	---	chr3:190439312-190521552 (+) // 95.9 // q28	---
201188_s_at	ITPR3	inositol 1,4,5-triphosphate receptor, type 3	D26351	3710	147267	Q14573 /// Q6ZRI1 /// Q6ZSG0 /// Q6ZT26	6812 // cation transport // Unknown /// 6816 // calcium ion transport // Unknown	5783 // endoplasmic reticulum // Unknown /// 16021 // integral to membrane // Unknown	4872 // receptor activity // Unknown /// 5220 // inositol 1,4,5-triphosphate-sensitive calcium-release channel activity // Unknown /// 5262 // calcium channel activity // Unknown	chr6:33697133-33771686 (+) // 99.58 // p21.31	Calcium_regulation_in_cardiac_cells // GenMAPP /// Smooth_muscle_contraction // GenMAPP
220125_at	DNAI1	dynein, axonemal, intermediate polypeptide 1	NM_012144	27019	242650 /// 244400 /// 604366	Q9UI46 /// Q8NHQ7	---	5856 // cytoskeleton // Unknown /// 5929 // cilium // Unknown /// 30286 // dynein complex // Unknown	3774 // motor activity // Unknown	chr9:34448832-34510979 (+) // 98.81 // p13.3	---
236246_x_at	MGC14276	hypothetical protein MGC14276	BF195670	253150	---	Q8N385	---	5634 // nucleus // Unknown	8270 // zinc ion binding // Unknown	chr1:35111563-35112031 (-) // 97.3 // p34.3	---
207891_s_at	TREX2	three prime repair exonuclease 2	NM_017518	11219	300370	Q99871 /// Q9BQ50 /// Q6ZUX9 /// Q9UFH9	---	---	---	chrX:152233974-152256942 (-) // 99.85 // q28	---
239544_at	SETBP1	SET binding protein 1	BE671251	26040	---	Q9Y6X0 /// Q6P6C3	---	5634 // nucleus // Unknown	3677 // DNA binding // Unknown	chr18:40787747-40788307 (+) // 95.74 // q12.3	---
1554071_at	FLJ25393	hypothetical protein FLJ25393	BC031247	159989	---	Q6ZRU6 /// Q86W88 /// Q8NEF1 /// Q96LL7	---	---	---	chr11:92758202-92811284 (+) // 89.55 // q21	---
215574_at	---	CDNA FLJ11454 fis, clone HEMBA1001463	AU144294	---	---	---	---	---	---	chr11:78812250-78813990 (-) // 37.59 // q14.1	---
202990_at	PYGL	phosphorylase, glycogen; liver (Hers disease, glycogen storage disease type VI)	NM_002863	5836	232700	P06737 /// Q641R5 /// Q6P1L4	5975 // carbohydrate metabolism // Unknown /// 5977 // glycogen metabolism // Unknown	---	8184 // glycogen phosphorylase activity // Unknown /// 16757 // transferase activity, transferring glycosyl groups // Unknown	chr14:50441810-50480922 (-) // 98.94 // q22.1	Glycogen_Metabolism // GenMAPP /// Starch and sucrose metabolism // KEGG
202625_at	LYN	V-yes-1 Yamaguchi sarcoma viral related oncogene homolog /// V-yes-1 Yamaguchi sarcoma viral related oncogene homolog	AI356412	4067	165120	P07948 /// Q6NUK7	6468 // protein amino acid phosphorylation // Unknown /// 7242 // intracellular signaling cascade // Unknown	---	4716 // receptor signaling protein tyrosine kinase activity // Unknown /// 5524 // ATP binding // Unknown /// 16740 // transferase activity // Unknown	---	---
1568949_at	PITPNC1	phosphatidylinositol transfer protein, cytoplasmic 1	BM042439	26207	605134	Q96I07 /// Q9UKF7	6810 // transport // Unknown /// 7165 // signal transduction // Unknown	5622 // intracellular // Unknown /// 5737 // cytoplasm // Unknown	8526 // phosphatidylinositol transporter activity // Unknown	chr17:62803803-62804780 (+) // 87.48 // q24.2	---
241203_at	---	---	F09245	---	---	---	---	---	---	chr5:167111868-167112186 (-) // 50.94 // q34	---
227613_at	ZNF331	Zinc finger protein 331	AW450874	55422	606043	Q9NQX6 /// Q68D63 /// Q71QC3 /// Q71QC4 /// Q71QC6 /// Q71QC8 /// Q71QC9 /// Q8NBU2 /// Q6PK05 /// Q71QC5	6355 // regulation of transcription, DNA-dependent // Unknown	5634 // nucleus // Unknown	3677 // DNA binding // Unknown /// 8270 // zinc ion binding // Unknown	chr19:58773569-58775050 (+) // 36.48 // q13.42	---
213849_s_at	PPP2R2B	protein phosphatase 2 (formerly 2A), regulatory subunit B (PR 52), beta isoform	AA974416	5521	604325 /// 604326	Q00005	7165 // signal transduction // Unknown	159 // protein phosphatase type 2A complex // Unknown	4721 // phosphoprotein phosphatase activity // Unknown /// 8601 // protein phosphatase type 2A regulator activity // Unknown	chr5:145949259-145949750 (-) // 81.56 // q32	Glycogen_Metabolism // GenMAPP
1570618_at	---	---	BU618690	---	---	---	---	---	---	chr1:150996069-150996788 (+) // 16.01 // q21.3	---
219288_at	C3orf14	chromosome 3 open reading frame 14	NM_020685	57415	---	Q9HBI5	---	---	---	chr3:62280434-62294358 (+) // 96.11 // p14.2	---
207406_at	CYP7A1	cytochrome P450, family 7, subfamily A, polypeptide 1	NM_000780	1581	118455	P22680	6118 // electron transport // Unknown /// 6699 // bile acid biosynthesis // Unknown /// 8203 // cholesterol metabolism // Unknown	5783 // endoplasmic reticulum // Unknown /// 5792 // microsome // Unknown /// 16020 // membrane // Unknown	4497 // monooxygenase activity // Unknown /// 8123 // cholesterol 7-alpha-monooxygenase activity // Unknown	chr8:59565291-59575275 (-) // 94.61 // q12.1	Statin_Pathway_PharmGKB // GenMAPP /// Bile acid biosynthesis // KEGG
1566538_at	---	---	AL050129	---	---	---	---	---	---	chr3:65670984-65673787 (+) // 35.25 // p14.1	---
240652_at	---	---	T91029	---	---	---	---	---	---	chr2:145100274-145100912 (-) // 94.19 // q22.3	---
1564401_at	LOC400748	hypothetical gene supported by BC040627	BC040627	400748	---	---	---	---	---	chr1:31000097-31002191 (+) // 52.73 // p35.2	---
237693_at	RIMS2	Regulating synaptic membrane exocytosis 2	R98978	9699	606630	Q9UQ26 /// Q6YBN2 /// Q8IWW0 /// Q68DJ3	6886 // intracellular protein transport // Unknown	---	5515 // protein binding // Unknown /// 8270 // zinc ion binding // Unknown /// 17137 // Rab interactor activity // Unknown	chr8:105059328-105059775 (+) // 41.16 // q22.3	---
201888_s_at	IL13RA1	interleukin 13 receptor, alpha 1	U81379	3597	300119	P78552 /// Q6ZW70 /// Q96BB4 /// Q9UDY5	7166 // cell surface receptor linked signal transduction // Unknown	5886 // plasma membrane // Unknown /// 5898 // interleukin-13 receptor complex // Unknown /// 16021 // integral to membrane // Unknown	4872 // receptor activity // Unknown /// 4896 // hematopoietin/interferon-class (D200-domain) cytokine receptor activity // Unknown	chrX:117643446-117708080 (+) // 98.13 // q24	---
206806_at	DGKI	diacylglycerol kinase, iota	NM_004717	9162	604072	P62945 /// Q9HD88	7205 // protein kinase C activation // Unknown /// 7242 // intracellular signaling cascade // Unknown	5634 // nucleus // Unknown /// 5737 // cytoplasm // Unknown	4143 // diacylglycerol kinase activity // Unknown /// 16740 // transferase activity // Unknown	chr7:136531639-136988864 (-) // 89.67 // q33	Ribosomal_Proteins // GenMAPP
213606_s_at	ARHGDIA	Rho GDP dissociation inhibitor (GDI) alpha	AI571798	396	601925	P52565	7162 // negative regulation of cell adhesion // Unknown /// 7266 // Rho protein signal transduction // Unknown	5737 // cytoplasm // Unknown	5094 // Rho GDP-dissociation inhibitor activity // Unknown /// 5096 // GTPase activator activity // Unknown /// 5515 // protein binding // Unknown	chr17:77418885-77421123 (-) // 87.11 // q25.3 /// chr17_random:1924759-1927014 (-) // 86.71 //	---
33323_r_at	SFN	stratifin	X57348	2810	601290	P31947 /// Q6FH51 /// Q96DH0	74 // regulation of cell cycle // Unknown /// 6469 // negative regulation of protein kinase activity // Unknown /// 7165 // signal transduction // Unknown /// 8283 // cell proliferation // Unknown	5615 // extracellular space // Unknown /// 5737 // cytoplasm // Unknown	8426 // protein kinase C inhibitor activity // Unknown /// 19904 // protein domain specific binding // Unknown	chr1:26873790-26875089 (+) // 58.96 // p36.11	Calcium_regulation_in_cardiac_cells // GenMAPP /// Smooth_muscle_contraction // GenMAPP
1554375_a_at	NR1H4	nuclear receptor subfamily 1, group H, member 4	AF478446	9971	603826	Q96RI1 /// Q6IPQ7 /// Q7Z2W0	6355 // regulation of transcription, DNA-dependent // Unknown	5634 // nucleus // Unknown	3700 // transcription factor activity // Unknown /// 3707 // steroid hormone receptor activity // Unknown	chr12:99399605-99459735 (+) // 99.67 // q23.1	---
209292_at	ID4	Inhibitor of DNA binding 4, dominant negative helix-loop-helix protein	AL022726	3400	600581	P47928	6357 // regulation of transcription from Pol II promoter // Unknown	5634 // nucleus // Unknown	3714 // transcription corepressor activity // Unknown	chr6:19945596-19950407 (+) // 96.66 // p22.3	---
203475_at	CYP19A1	cytochrome P450, family 19, subfamily A, polypeptide 1	NM_000103	1588	107910	P11511 /// Q8IYG4 /// Q8IYJ7 /// Q8TCA4 /// Q7Z471	6118 // electron transport // Unknown /// 6694 // steroid biosynthesis // Unknown	5624 // membrane fraction // Unknown /// 5792 // microsome // Unknown /// 16020 // membrane // Unknown	4497 // monooxygenase activity // Unknown /// 5489 // electron transporter activity // Unknown /// 8402 // aromatase activity // Unknown /// 19825 // oxygen binding // Unknown /// 50381 // unspecific monooxygenase activity // Unknown	chr15:49289099-49322428 (-) // 99.67 // q21.2	Fatty acid metabolism // KEGG /// gamma-Hexachlorocyclohexane degradation // KEGG /// Tryptophan metabolism // KEGG
228347_at	SIX1	Sine oculis homeobox homolog 1 (Drosophila)	N79004	6495	601205	Q15475	6355 // regulation of transcription, DNA-dependent // Unknown /// 7275 // development // Unknown /// 7517 // muscle development // Unknown	5634 // nucleus // Unknown	3700 // transcription factor activity // Unknown	chr14:60181174-60182336 (-) // 96.26 // q23.1	---
210904_s_at	IL13RA1	interleukin 13 receptor, alpha 1	U81380	3597	300119	P78552 /// Q6ZW70 /// Q96BB4 /// Q9UDY5	7166 // cell surface receptor linked signal transduction // Unknown	5886 // plasma membrane // Unknown /// 5898 // interleukin-13 receptor complex // Unknown /// 16021 // integral to membrane // Unknown	4872 // receptor activity // Unknown /// 4896 // hematopoietin/interferon-class (D200-domain) cytokine receptor activity // Unknown	chrX:117643446-117677364 (+) // 97.18 // q24	---
222838_at	SLAMF7	SLAM family member 7	AL121985	57823	606625	Q9NY08 /// Q9NY23 /// Q8N6Y8 /// Q8ND32 /// Q9NQ25	---	---	4872 // receptor activity // Unknown	chr1:157522148-157537678 (+) // 82.6 // q23.3	---
1567183_s_at	---	NTera2D1 cell line mRNA containing L1 retroposon, clone P1. /// Clone P1 NTera2D1 teratocarcinoma mRNA	U61087	---	---	---	---	---	---	chr3:6749027-6752543 (+) // 78.88 // p26.1	---
231703_s_at	---	---	AV647973	---	---	---	---	---	---	chr4:100402325-100422598 (+) // 85.2 // q23	---
1561132_at	DHX35	DEAH (Asp-Glu-Ala-His) box polypeptide 35	AF086439	60625	---	Q9H5Z1	---	---	3676 // nucleic acid binding // Unknown /// 5524 // ATP binding // Unknown /// 8026 // ATP-dependent helicase activity // Unknown /// 16787 // hydrolase activity // Unknown	chr20:37085926-37086544 (+) // 98.25 // q11.23	---
217536_x_at	---	Transcribed locus, weakly similar to NP_055301.1 neuronal thread protein AD7c-NTP [Homo sapiens]	M78162	---	---	---	---	---	---	chr2:54113661-54114011 (+) // 42.47 // p16.2	---
241744_x_at	---	Transcribed locus	AI275419	---	---	---	---	---	---	chr6:8415555-8415957 (+) // 95.47 // p24.3	---
237492_at	---	---	R37728	---	---	---	---	---	---	chr6:166017706-166018051 (-) // 41.05 // q27	---
1553746_a_at	---	---	NM_173591	---	---	---	---	---	---	chr12:79252601-79275831 (+) // 92.74 // q21.31	---
206423_at	ANGPTL7	angiopoietin-like 7	NM_021146	10218	---	O43827	6979 // response to oxidative stress // Unknown	5625 // soluble fraction // Unknown /// 5737 // cytoplasm // Unknown	---	chr1:11183895-11190303 (+) // 99.8 // p36.22	---
1563607_x_at	LOC286359	Hypothetical protein LOC286359	AL833510	286359	---	Q8N7P6	---	---	---	chr9:97232675-97238502 (-) // 70.3 // q22.33	---
219892_at	TM6SF1	transmembrane 6 superfamily member 1	NM_023003	53346	606562	Q9BZW5 /// Q6P4D7 /// Q8N5N8	---	16021 // integral to membrane // Unknown	---	chr15:81567383-81596678 (+) // 97.99 // q25.2	---
227314_at	ITGA2	Integrin, alpha 2 (CD49B, alpha 2 subunit of VLA-2 receptor)	N95414	3673	192974	P17301	7160 // cell-matrix adhesion // Unknown /// 7229 // integrin-mediated signaling pathway // Unknown /// 7596 // blood coagulation // Unknown /// 9887 // organogenesis // Unknown	5886 // plasma membrane // Unknown /// 8305 // integrin complex // Unknown /// 16021 // integral to membrane // Unknown	287 // magnesium ion binding // Unknown /// 4872 // receptor activity // Unknown /// 5518 // collagen binding // Unknown	chr5:52424266-52426170 (+) // 65.54 // q11.2	Integrin-mediated_cell_adhesion_KEGG // GenMAPP
225801_at	FBXO32	F-box protein 32	AW518714	114907	606604	Q969P5 /// Q8TC93	6512 // ubiquitin cycle // Unknown	---	---	chr8:124583250-124622392 (-) // 95.67 // q24.13	---
213419_at	APBB2	amyloid beta (A4) precursor protein-binding, family B, member 2 (Fe65-like)	U62325	323	602710	Q92870	7050 // cell cycle arrest // Unknown /// 7242 // intracellular signaling cascade // Unknown /// 7409 // axonogenesis // Unknown /// 30048 // actin filament-based movement // Unknown /// 30308 // negative regulation of cell growth // Unknown /// 45449 // regulation of transcription // Unknown /// 45749 // negative regulation of S phase of mitotic cell cycle // Unknown /// 50821 // protein stabiliz…	5634 // nucleus // Unknown /// 16020 // membrane // Unknown /// 30027 // lamellipodium // Unknown /// 30426 // growth cone // Unknown /// 45202 // synapse // Unknown	1540 // beta-amyloid binding // Unknown /// 8134 // transcription factor binding // Unknown /// 35035 // histone acetyltransferase binding // Unknown	chr4:40657541-40857168 (-) // 95.02 // p14	---
213273_at	ODZ4	odz, odd Oz/ten-m homolog 4 (Drosophila)	BF112171	26011	---	Q6N022 /// Q7Z3C7 /// Q96MS6 /// Q9P2P4 /// Q9Y4S2	---	---	---	chr11:78041975-78057856 (-) // 95.31 // q14.1	---
210527_x_at	TUBA2	tubulin, alpha 2	L11645	7278	602528	Q13748	7018 // microtubule-based movement // Unknown /// 46785 // microtubule polymerization // Unknown	45298 // tubulin // Unknown	3924 // GTPase activity // Unknown /// 5198 // structural molecule activity // Unknown /// 5525 // GTP binding // Unknown	chr2:132073752-132074164 (+) // 96.55 // q21.1 /// chr22:19748539-19748951 (+) // 90.28 // q11.21 /// chr13:18645991-18646310 (-) // 100.0 // q12.11 /// chr2:130665622-130666034 (-) // 95.3 // q21.1	---
211832_s_at	MDM2	Mdm2, transformed 3T3 cell double minute 2, p53 binding protein (mouse)	AF201370	4193	164785	Q00987 /// Q71TW9 /// Q86WA2 /// Q86WA3 /// Q86WA4 /// Q86WA5 /// Q8NDV9 /// Q8NDW0 /// Q8NDW1 /// Q8NDW2 /// Q8TE46 /// Q8TE47 /// Q8WYJ1 /// Q8WYJ2 /// Q8WYJ3 /// Q96DS0 /// Q96DS1 /// Q96DS2 /// Q96DS3 /// Q96DS4 /// Q96DS5 /// Q9H4C3 /// Q9H4C4 /// Q9H4C5 /// Q9H4C2	74 // regulation of cell cycle // Unknown /// 122 // negative regulation of transcription from Pol II promoter // Unknown /// 6461 // protein complex assembly // Unknown /// 8285 // negative regulation of cell proliferation // Unknown /// 16567 // protein ubiquitination // Unknown /// 42176 // regulation of protein catabolism // Unknown	151 // ubiquitin ligase complex // Unknown /// 5634 // nucleus // Unknown /// 5654 // nucleoplasm // Unknown /// 5730 // nucleolus // Unknown	4842 // ubiquitin-protein ligase activity // Unknown /// 5515 // protein binding // Unknown /// 8270 // zinc ion binding // Unknown /// 16874 // ligase activity // Unknown /// 17163 // negative regulator of basal transcription activity // Unknown	chr12:67489273-67519896 (+) // 100.0 // q15	Apoptosis // GenMAPP /// Apoptosis_GenMAPP // GenMAPP /// Cell_cycle_KEGG // GenMAPP /// G1_to_S_cell_cycle_Reactome // GenMAPP
208329_at	PBOV1	prostate and breast cancer overexpressed 1	NM_021635	59351	605669	Q9GZY1	---	---	---	chr6:138578821-138581321 (-) // 75.2 // q23.3	---
212843_at	NCAM1	neural cell adhesion molecule 1	AA126505	4684	116930	P13591 /// P13592 /// O00557 /// Q6UWE9 /// Q86X47 /// Q96CJ3	7155 // cell adhesion // Unknown /// 7267 // cell-cell signaling // Unknown /// 7268 // synaptic transmission // Unknown	5886 // plasma membrane // Unknown /// 16020 // membrane // Unknown /// 16021 // integral to membrane // Unknown	5515 // protein binding // Unknown	chr11:112608724-112653830 (+) // 94.51 // q23.1	---
221143_at	RPA4	replication protein A4, 34kDa	NM_013347	29935	---	Q13156	6260 // DNA replication // Unknown /// 6270 // DNA replication initiation // Unknown	5634 // nucleus // Unknown /// 5662 // DNA replication factor A complex // Unknown	3676 // nucleic acid binding // Unknown /// 3697 // single-stranded DNA binding // Unknown	chrX:95945051-95946593 (+) // 95.64 // q21.33	DNA_replication_Reactome // GenMAPP
235171_at	---	---	AI354636	---	---	---	---	---	---	chr8:60195093-60196460 (+) // 98.55 // q12.1	---
223371_s_at	DNAJC4	DnaJ (Hsp40) homolog, subfamily C, member 4	BF116164	3338	604189	Q9NNZ3 /// Q6PIN0 /// Q86VG4 /// Q96FY5	6457 // protein folding // Unknown	16021 // integral to membrane // Unknown	31072 // heat shock protein binding // Unknown /// 51082 // unfolded protein binding // Unknown	chr11:63754231-63758328 (+) // 91.23 // q13.1	---
200906_s_at	KIAA0992	palladin	AK025843	23022	608092	Q7L3E0 /// Q7L8P5 /// Q7Z3W0 /// Q86WE8 /// Q8N1M2 /// Q8WX93 /// Q9UQF5 /// Q9Y2J6 /// Q9Y3E9	---	---	---	chr4:170193847-170224300 (+) // 94.85 // q32.3	---
1561092_at	KLHDC4	Kelch domain containing 4	AL833766	54758	---	Q8NAC6 /// Q8TBB5 /// Q96F29 /// Q9BVN3 /// Q9H863 /// Q9UF94	---	---	---	chr16:85959936-86317302 (-) // 31.82 // q24.2	---
225454_at	LOC115098	hypothetical protein BC013949	AW248770	115098	---	Q96CT7	---	5634 // nucleus // Unknown	3677 // DNA binding // Unknown	chr19:17908216-17915793 (+) // 86.87 // p13.11	---
229568_at	MOBKL2B	MOB1, Mps One Binder kinase activator-like 2B (yeast)	AI692878	79817	---	Q86TA1 /// Q8TEC6	---	---	---	chr9:27315207-27315813 (-) // 97.58 // p21.2	---
217440_at	---	MRNA; cDNA DKFZp566A193 (from clone DKFZp566A193)	AL049342	---	---	---	---	---	---	chr7:43386983-43388351 (+) // 76.59 // p13	---
222764_at	---	---	AI928342	---	---	---	---	---	---	chr11:61880371-61917463 (+) // 74.01 // q12.3	---
1561673_at	---	Homo sapiens, clone IMAGE:5268080, mRNA	BC040579	---	---	---	---	---	---	chr15:68650351-68652824 (-) // 45.42 // q23	---
205118_at	---	---	M60626	---	---	---	---	---	---	---	---
213954_at	KIAA0888	KIAA0888 protein	AB020695	26049	---	Q6MZT0 /// Q9H989 /// Q9Y6X4	---	---	---	chr5:74111214-74198371 (-) // 99.77 // q13.3	---
206306_at	RYR3	ryanodine receptor 3	NM_001036	6263	180903	Q15413	6812 // cation transport // Unknown /// 6816 // calcium ion transport // Unknown /// 6874 // calcium ion homeostasis // Unknown	5624 // membrane fraction // Unknown /// 5887 // integral to plasma membrane // Unknown	4872 // receptor activity // Unknown /// 5219 // ryanodine-sensitive calcium-release channel activity // Unknown /// 5509 // calcium ion binding // Unknown /// 15278 // calcium-release channel activity // Unknown	chr15:31390468-31945594 (+) // 99.72 // q13.3	Calcium_regulation_in_cardiac_cells // GenMAPP /// Smooth_muscle_contraction // GenMAPP
1553306_at	CASP8	caspase 8, apoptosis-related cysteine protease	NM_033358	841	601763 /// 607271	Q14790 /// Q96NK0 /// Q6NVI2	6508 // proteolysis and peptidolysis // Unknown /// 8632 // apoptotic program // Unknown /// 42981 // regulation of apoptosis // Unknown /// 43123 // positive regulation of I-kappaB kinase/NF-kappaB cascade // Unknown	5739 // mitochondrion // Unknown /// 5856 // cytoskeleton // Unknown	4871 // signal transducer activity // Unknown /// 5515 // protein binding // Unknown /// 8234 // cysteine-type peptidase activity // Unknown /// 16787 // hydrolase activity // Unknown /// 30693 // caspase activity // Unknown	chr2:201923694-201972144 (+) // 95.86 // q33.1	Apoptosis // GenMAPP /// Apoptosis_GenMAPP // GenMAPP /// Apoptosis_KEGG // GenMAPP
239712_at	C9orf93	chromosome 9 open reading frame 93	N24610	203238	---	Q69YN6 /// Q6P1W1 /// Q6TFL3 /// Q6ZR13 /// Q7Z3F8 /// Q8N1Z4 /// Q8N8L3 /// Q8NCV3 /// Q8TBR2	---	---	---	chr9:15963523-15964035 (+) // 99.03 // p22.3	---
1555158_at	RAB36	RAB36, member RAS oncogene family	BC027465	9609	605662	O95755 /// Q8N647	6886 // intracellular protein transport // Unknown /// 7264 // small GTPase mediated signal transduction // Unknown	5794 // Golgi apparatus // Unknown	3924 // GTPase activity // Unknown /// 5525 // GTP binding // Unknown	chr22:21826677-21827948 (-) // 86.94 // q11.23	---
222611_s_at	PSPC1	paraspeckle component 1	AA969958	55269	---	Q8NCZ9 /// Q9NV36 /// Q8WXE8 /// Q8WXF1	398 // nuclear mRNA splicing, via spliceosome // Unknown	---	3676 // nucleic acid binding // Unknown	chr13:19146140-19255113 (-) // 99.17 // q12.11	---
230682_x_at	ABCC3	ATP-binding cassette, sub-family C (CFTR/MRP), member 3	BF515888	8714	604323	O15438 /// Q86VN9 /// Q86X85	6810 // transport // Unknown	5624 // membrane fraction // Unknown /// 5887 // integral to plasma membrane // Unknown	5524 // ATP binding // Unknown /// 8514 // organic anion transporter activity // Unknown /// 16887 // ATPase activity // Unknown /// 42626 // ATPase activity, coupled to transmembrane movement of substances // Unknown	chr17:46110166-46110713 (+) // 97.33 // q21.33	---
210611_s_at	DTNA	dystrobrevin, alpha	U26744	1837	601239 /// 604169 /// 606617	Q9Y4J8 /// Q9BS59	6941 // striated muscle contraction // Unknown /// 7165 // signal transduction // Unknown /// 7274 // neuromuscular synaptic transmission // Unknown	45202 // synapse // Unknown	5509 // calcium ion binding // Unknown /// 5515 // protein binding // Unknown /// 8270 // zinc ion binding // Unknown	chr18:30513498-30700942 (+) // 99.83 // q12.1	---
235048_at	KIAA0888	KIAA0888 protein	AV720650	26049	---	Q6MZT0 /// Q9H989 /// Q9Y6X4	---	---	---	chr5:74109098-74110640 (-) // 98.4 // q13.3	---
200897_s_at	KIAA0992	palladin	NM_016081	23022	608092	Q7L3E0 /// Q7L8P5 /// Q7Z3W0 /// Q86WE8 /// Q8N1M2 /// Q8WX93 /// Q9UQF5 /// Q9Y2J6 /// Q9Y3E9	---	---	---	chr4:170193950-170224296 (+) // 97.68 // q32.3	---
236773_at	---	---	AI635931	---	---	---	---	---	---	chr20:15814461-15814858 (-) // 90.32 // p12.1	---
218730_s_at	OGN	osteoglycin (osteoinductive factor, mimecan)	NM_014057	4969	602383	P20774 /// Q7Z4E0 /// Q7Z532	---	---	8083 // growth factor activity // Unknown	chr9:92226442-92245312 (-) // 99.2 // q22.31	---
240610_at	---	---	AW291260	---	---	---	---	---	---	chr5:164366957-164489812 (+) // 89.78 // q34	---
231067_s_at	---	---	BF114967	---	---	---	---	---	---	chr6:151770979-151771451 (-) // 96.33 // q25.1	---
206935_at	PCDH8	protocadherin 8	NM_002590	5100	603580	O95206	7155 // cell adhesion // Unknown /// 7156 // homophilic cell adhesion // Unknown /// 7267 // cell-cell signaling // Unknown	5887 // integral to plasma membrane // Unknown	5509 // calcium ion binding // Unknown /// 5515 // protein binding // Unknown	chr13:52316111-52320775 (-) // 96.61 // q14.3	---
1554519_at	CD80	CD80 antigen (CD28 antigen ligand 1, B7-1 antigen)	BC042665	941	112203	P33681	6955 // immune response // Unknown /// 7242 // intracellular signaling cascade // Unknown /// 7267 // cell-cell signaling // Unknown /// 9967 // positive regulation of signal transduction // Unknown /// 42110 // T-cell activation // Unknown /// 45086 // positive regulation of interleukin-2 biosynthesis // Unknown /// 45425 // positive regulation of granulocyte macrophage colony-stimulating factor…	5886 // plasma membrane // Unknown /// 16021 // integral to membrane // Unknown	5102 // receptor binding // Unknown /// 5515 // protein binding // Unknown /// 15026 // coreceptor activity // Unknown /// 16563 // transcriptional activator activity // Unknown	chr3:120725834-120761140 (-) // 91.34 // q13.33	Inflammatory_Response_Pathway // GenMAPP
1562909_at	---	Homo sapiens, clone IMAGE:5197767, mRNA	BC040731	---	---	---	---	---	---	chr1:197069448-197074577 (-) // 27.75 // q32.1	---
210644_s_at	LAIR1	leukocyte-associated Ig-like receptor 1	AF109683	3903	602992	Q6GTX8	---	---	4872 // receptor activity // Unknown	chr19:59558098-59568280 (-) // 95.11 // q13.42	---
205499_at	SRPX2	sushi-repeat-containing protein, X-linked 2	NM_014467	27286	---	Q8WW85 /// O60687	---	---	---	chrX:99705369-99732437 (+) // 97.23 // q22.1	---
1560999_a_at	IL12RB2	Interleukin 12 receptor, beta 2	R01220	3595	601642	Q99665	7166 // cell surface receptor linked signal transduction // Unknown /// 8284 // positive regulation of cell proliferation // Unknown	5887 // integral to plasma membrane // Unknown	4872 // receptor activity // Unknown /// 4907 // interleukin receptor activity // Unknown	chr1:67515287-67515600 (+) // 72.26 // p31.2	---
220177_s_at	TMPRSS3	transmembrane protease, serine 3	NM_024022	64699	601072 /// 605316 /// 605511	P57727 /// Q5USC7 /// Q6ZNH3 /// Q8WY52 /// Q6ZMC3	6508 // proteolysis and peptidolysis // Unknown /// 7605 // perception of sound // Unknown	5783 // endoplasmic reticulum // Unknown /// 16021 // integral to membrane // Unknown	4263 // chymotrypsin activity // Unknown /// 4295 // trypsin activity // Unknown /// 5044 // scavenger receptor activity // Unknown /// 8233 // peptidase activity // Unknown /// 16787 // hydrolase activity // Unknown	chr21:42665068-42689269 (-) // 86.51 // q22.3	---
1562373_at	ITPR1	Inositol 1,4,5-triphosphate receptor, type 1	AL832701	3708	147265	Q14643	6812 // cation transport // Unknown /// 6816 // calcium ion transport // Unknown /// 7165 // signal transduction // Unknown	5789 // endoplasmic reticulum membrane // Unknown /// 16021 // integral to membrane // Unknown	5220 // inositol 1,4,5-triphosphate-sensitive calcium-release channel activity // Unknown /// 5262 // calcium channel activity // Unknown /// 8095 // inositol-1,4,5-triphosphate receptor activity // Unknown	chr3:4860825-4863806 (-) // 85.61 // p26.1	G_Protein_Signaling // GenMAPP /// Calcium_regulation_in_cardiac_cells // GenMAPP /// Smooth_muscle_contraction // GenMAPP
238900_at	HLA-DRB1 /// HLA-DRB3	major histocompatibility complex, class II, DR beta 1 /// major histocompatibility complex, class II, DR beta 3	BE669692	3123 /// 3125	142857 /// 181000	P04229 /// P13760 /// P13761 /// Q30134 /// Q9TQE0 /// Q30167 /// P20039 /// P79483 /// P01913 /// P01912 /// P01914 /// P13762 /// Q8NEI3 /// Q8TB62 /// Q96HZ9 /// O19190 /// O19507 /// O19517 /// O19585 /// O19586 /// O19721 /// O19725 /// O19730 /// O19742 /// O19762 /// O19763 /// O78042 /// O78117 /// P79552 /// Q13365 /// Q29671 /// Q29673 /// Q29717 /// Q29726 /// Q29755 /// Q29789 /// Q29…	6955 // immune response // Unknown /// 7165 // signal transduction // Unknown /// 19884 // antigen presentation, exogenous antigen // Unknown /// 19886 // antigen processing, exogenous antigen via MHC class II // Unknown	5887 // integral to plasma membrane // Unknown /// 16020 // membrane // Unknown /// 16021 // integral to membrane // Unknown	45012 // MHC class II receptor activity // Unknown	chr6:32653613-32654539 (-) // 75.32 // p21.32	---
202948_at	IL1R1	interleukin 1 receptor, type I	NM_000877	3554	147810	P14778 /// Q6NWP5 /// Q6NWP6	6954 // inflammatory response // Unknown /// 7166 // cell surface receptor linked signal transduction // Unknown	5887 // integral to plasma membrane // Unknown	4888 // transmembrane receptor activity // Unknown /// 4909 // interleukin-1, Type I, activating receptor activity // Unknown	chr2:102228919-102254852 (+) // 94.03 // q11.2	Hypertrophy_model // GenMAPP
216010_x_at	FUT3	fucosyltransferase 3 (galactoside 3(4)-L-fucosyltransferase, Lewis blood group included)	D89324	2525	111100	P21217	5975 // carbohydrate metabolism // Unknown /// 6486 // protein amino acid glycosylation // Unknown	5624 // membrane fraction // Unknown /// 5794 // Golgi apparatus // Unknown /// 16021 // integral to membrane // Unknown	16757 // transferase activity, transferring glycosyl groups // Unknown /// 17060 // 3-galactosyl-N-acetylglucosaminide 4-alpha-L-fucosyltransferase activity // Unknown	chr19:5794764-5802465 (-) // 90.91 // p13.3	Blood group glycolipid biosynthesis-lactoseries // KEGG
218856_at	TNFRSF21	tumor necrosis factor receptor superfamily, member 21	NM_016629	27242	605732	O75509 /// Q9NZD9	6915 // apoptosis // Unknown /// 7165 // signal transduction // Unknown	16021 // integral to membrane // Unknown	4872 // receptor activity // Unknown /// 5515 // protein binding // Unknown	chr6:47307227-47308012 (-) // 93.86 // p12.3	Apoptosis // GenMAPP
240685_at	---	Homo sapiens, clone IMAGE:4829423, mRNA	AI125330	---	---	---	---	---	---	chr4:147388211-147388623 (-) // 27.37 // q31.22	---
233607_at	---	CDNA FLJ11739 fis, clone HEMBA1005497	AU145679	---	---	---	---	---	---	chr10:60142271-60144637 (+) // 63.12 // q21.1	---
1568871_at	---	---	BC032557	---	---	---	---	---	---	chr3:86124022-86159847 (-) // 15.88 // p12.1	---
232117_at	ZNF471	zinc finger protein 471	AA461597	57573	---	Q9BX82 /// Q8N6T4 /// Q96AS0	6355 // regulation of transcription, DNA-dependent // Unknown	5634 // nucleus // Unknown	3677 // DNA binding // Unknown /// 8270 // zinc ion binding // Unknown	chr19:61721726-61732903 (+) // 57.67 // q13.43	---
1553146_at	FLJ32859	hypothetical protein FLJ32859	NM_152539	152405	---	Q96M34	---	---	16301 // kinase activity // Unknown	chr3:120347687-120352992 (+) // 91.35 // q13.32	---
211656_x_at	HLA-DQB1	major histocompatibility complex, class II, DQ beta 1 /// major histocompatibility complex, class II, DQ beta 1	M32577	3119	123400 /// 604305	P01919 /// P05537 /// P01920 /// P03992 /// O19506 /// O19707 /// O19709 /// O19710 /// O19711 /// O19712 /// O19714 /// O19741 /// O19764 /// O78219 /// P79526 /// P79551 /// Q09035 /// Q29785 /// Q29877 /// Q29884 /// Q29965 /// Q29967 /// Q29969 /// Q29970 /// Q30007 /// Q30061 /// Q30074 /// Q30075 /// Q30076 /// Q30077 /// Q30078 /// Q30079 /// Q30080 /// Q30081 /// Q30083 /// Q30084 /// Q30…	6955 // immune response // Unknown /// 19884 // antigen presentation, exogenous antigen // Unknown /// 19886 // antigen processing, exogenous antigen via MHC class II // Unknown	16021 // integral to membrane // Unknown	45012 // MHC class II receptor activity // Unknown	chr6:32735641-32742330 (-) // 92.03 // p21.32	---
1556366_s_at	FLJ33708	Hypothetical protein FLJ33708	BC031936	285780	---	Q8N5P6 /// Q8NBC3	---	---	---	chr6:6291697-6567976 (-) // 93.85 // p25.1	---
232187_at	PALMD	palmdelphin	AL571429	54873	---	Q9H7E6 /// Q9NP74 /// Q9NPM5 /// Q9NPM6 /// Q9NPS0	8360 // regulation of cell shape // Unknown	16020 // membrane // Unknown	---	chr1:99839895-99872708 (+) // 89.63 // p21.2	---
227735_s_at	C10orf99	chromosome 10 open reading frame 99	AA553959	387695	---	Q6UWK7	---	---	---	chr10:85923533-85935028 (+) // 85.77 // q23.1	---
1552299_at	C6orf199	chromosome 6 open reading frame 199	NM_145025	221264	---	Q96NF4 /// Q8WW00	---	---	5524 // ATP binding // Unknown /// 16301 // kinase activity // Unknown /// 16740 // transferase activity // Unknown	chr6:110059601-110119113 (-) // 56.88 // q21	---
205838_at	GYPA	glycophorin A (includes MN blood group)	NM_002099	2993	111300	P02724 /// P06028 /// Q03870 /// Q12832 /// Q13030 /// Q14419 /// Q14420 /// Q14421 /// Q14440 /// Q16336 /// Q6R6M6	---	5624 // membrane fraction // Unknown /// 5886 // plasma membrane // Unknown /// 16020 // membrane // Unknown /// 16021 // integral to membrane // Unknown	---	chr4:145388061-145419449 (-) // 81.41 // q31.21	---
217394_at	TRA@	T cell receptor alpha locus	AE000659	6955	186880	Q6IPR8 /// Q6IRV4 /// Q6NS93 /// Q6NSA0 /// Q6NSA1 /// Q6NSA6 /// Q6P4G7 /// Q6GMW8 /// Q6P4I7 /// Q8WUD0	6968 // cellular defense response // Unknown	5887 // integral to plasma membrane // Unknown	4872 // receptor activity // Unknown /// 42287 // MHC protein binding // Unknown /// 42605 // peptide antigen binding // Unknown	chr14:21406882-21407386 (+) // 100.0 // q11.2	---
223949_at	TMPRSS3	transmembrane protease, serine 3	AB038160	64699	601072 /// 605316 /// 605511	P57727 /// Q5USC7 /// Q6ZNH3 /// Q8WY52 /// Q6ZMC3	6508 // proteolysis and peptidolysis // Unknown /// 7605 // perception of sound // Unknown	5783 // endoplasmic reticulum // Unknown /// 16021 // integral to membrane // Unknown	4263 // chymotrypsin activity // Unknown /// 4295 // trypsin activity // Unknown /// 5044 // scavenger receptor activity // Unknown /// 8233 // peptidase activity // Unknown /// 16787 // hydrolase activity // Unknown	chr21:42675054-42689269 (-) // 86.9 // q22.3	---
219387_at	KIAA1212	KIAA1212	NM_017571	55704	---	O14997 /// Q6DCA5 /// Q6PAV0 /// Q7Z3C5 /// Q9NW05 /// Q9UI01 /// Q9ULK8 /// Q7Z339 /// Q5HYD0	---	16020 // membrane // Unknown	---	chr2:55473104-55558400 (-) // 97.49 // p16.1	---
209260_at	SFN	stratifin	BC000329	2810	601290	P31947 /// Q6FH51 /// Q96DH0	74 // regulation of cell cycle // Unknown /// 6469 // negative regulation of protein kinase activity // Unknown /// 7165 // signal transduction // Unknown /// 8283 // cell proliferation // Unknown	5615 // extracellular space // Unknown /// 5737 // cytoplasm // Unknown	8426 // protein kinase C inhibitor activity // Unknown /// 19904 // protein domain specific binding // Unknown	chr1:26873794-26875089 (+) // 95.38 // p36.11	Calcium_regulation_in_cardiac_cells // GenMAPP /// Smooth_muscle_contraction // GenMAPP
201109_s_at	THBS1	thrombospondin 1	AV726673	7057	188060	P07996	6928 // cell motility // Unknown /// 7155 // cell adhesion // Unknown /// 7275 // development // Unknown /// 7399 // neurogenesis // Unknown /// 7596 // blood coagulation // Unknown	5576 // extracellular region // Unknown	4866 // endopeptidase inhibitor activity // Unknown /// 4871 // signal transducer activity // Unknown /// 5198 // structural molecule activity // Unknown /// 5509 // calcium ion binding // Unknown /// 5515 // protein binding // Unknown /// 8201 // heparin binding // Unknown	chr15:37660425-37676960 (+) // 97.77 // q14	TGF_Beta_Signaling_Pathway // GenMAPP /// Inflammatory_Response_Pathway // GenMAPP
243208_x_at	MGC33407	hypothetical protein MGC33407	AI028227	284382	---	Q6X960 /// Q8TC94	---	15629 // actin cytoskeleton // Unknown	5200 // structural constituent of cytoskeleton // Unknown	chr19:8668746-8669151 (-) // 98.53 // p13.2	---
236468_at	KIAA1906	KIAA1906 protein	AI369234	114795	---	Q8NA73 /// Q96PY1	---	---	---	chr12:124671167-124671798 (+) // 91.63 // q24.31	---
1561407_at	CENTD1	Centaurin, delta 1	BC031283	116984	606645	Q8WZ64 /// Q96L70 /// Q96P49 /// Q7Z2L5	7165 // signal transduction // Unknown /// 43087 // regulation of GTPase activity // Unknown	---	---	chr4:35772409-35898023 (-) // 63.96 // p14	---
200907_s_at	KIAA0992	palladin	AU157932	23022	608092	Q7L3E0 /// Q7L8P5 /// Q7Z3W0 /// Q86WE8 /// Q8N1M2 /// Q8WX93 /// Q9UQF5 /// Q9Y2J6 /// Q9Y3E9	---	---	---	chr4:170193847-170224300 (+) // 94.85 // q32.3	---
201397_at	PHGDH	phosphoglycerate dehydrogenase	NM_006623	26227	601815 /// 606879	O43175 /// Q8N5M8 /// Q9UMY2 /// Q9UMY3	6564 // L-serine biosynthesis // Unknown /// 7420 // brain development // Unknown	---	4617 // phosphoglycerate dehydrogenase activity // Unknown /// 5489 // electron transporter activity // Unknown /// 16491 // oxidoreductase activity // Unknown	chr1:119975831-119998878 (+) // 66.14 // p12	---
241970_at	PVRL3	Poliovirus receptor-related 3	C14898	25945	607147	Q6NVZ3 /// Q8NC05 /// Q8WVU4 /// Q9BVA9 /// Q9NQS3 /// Q9Y412	---	---	4872 // receptor activity // Unknown	chr3:112280767-112282215 (+) // 94.52 // q13.13	---
241660_at	---	---	AI972016	---	---	---	---	---	---	chr15:70669236-70670005 (-) // 53.65 // q24.1	---
201644_at	TSTA3	tissue specific transplantation antigen P35B	NM_003313	7264	137020	Q13630	6486 // protein amino acid glycosylation // Unknown /// 7159 // leukocyte cell adhesion // Unknown /// 9225 // nucleotide-sugar metabolism // Unknown /// 42351 // 'de novo' GDP-L-fucose biosynthesis // Unknown	5737 // cytoplasm // Unknown	5489 // electron transporter activity // Unknown /// 16491 // oxidoreductase activity // Unknown /// 16853 // isomerase activity // Unknown /// 42356 // GDP-4-dehydro-D-rhamnose reductase activity // Unknown /// 50577 // GDP-L-fucose synthase activity // Unknown	chr8:144765932-144770039 (-) // 96.57 // q24.3	---
1559459_at	---	---	BC043571	---	---	---	---	---	---	chr20:15820980-15822922 (-) // 79.61 // p12.1	---
237597_at	---	Transcribed locus	AI655887	---	---	---	---	---	---	chr7:142710250-142710702 (+) // 96.58 // q34	---
227034_at	C2orf26	chromosome 2 open reading frame 26	BE669553	65124	---	Q8NE15 /// Q9H6U1	---	---	---	chr2:109732973-109733942 (+) // 93.88 // q13	---
209823_x_at	HLA-DQB1	major histocompatibility complex, class II, DQ beta 1	M17955	3119	123400 /// 604305	P01919 /// P05537 /// P01920 /// P03992 /// O19506 /// O19707 /// O19709 /// O19710 /// O19711 /// O19712 /// O19714 /// O19741 /// O19764 /// O78219 /// P79526 /// P79551 /// Q09035 /// Q29785 /// Q29877 /// Q29884 /// Q29965 /// Q29967 /// Q29969 /// Q29970 /// Q30007 /// Q30061 /// Q30074 /// Q30075 /// Q30076 /// Q30077 /// Q30078 /// Q30079 /// Q30080 /// Q30081 /// Q30083 /// Q30084 /// Q30…	6955 // immune response // Unknown /// 19884 // antigen presentation, exogenous antigen // Unknown /// 19886 // antigen processing, exogenous antigen via MHC class II // Unknown	16021 // integral to membrane // Unknown	45012 // MHC class II receptor activity // Unknown	chr6:32735919-32742435 (-) // 91.71 // p21.32	---
1561222_at	LOC283432	hypothetical protein LOC283432	BC037211	283432	---	---	---	---	---	chr12:101705527-101720644 (-) // 66.63 // q23.2	---
233413_at	---	CDNA FLJ13457 fis, clone PLACE1003343	AU156421	---	---	---	---	---	---	chr4:90959833-90962266 (+) // 76.38 // q22.1	---
210447_at	GLUD1 /// GLUD2	glutamate dehydrogenase 1 /// glutamate dehydrogenase 2	BC005111	2746 /// 2747	138130 /// 606762 /// 300144	P00367 /// P49448 /// Q14400 /// Q9BSD0	6520 // amino acid metabolism // Unknown /// 6538 // glutamate catabolism // Unknown	5739 // mitochondrion // Unknown	4353 // glutamate dehydrogenase [NAD(P)+] activity // Unknown /// 5524 // ATP binding // Unknown /// 5525 // GTP binding // Unknown /// 16491 // oxidoreductase activity // Unknown /// 4352 // glutamate dehydrogenase activity // Unknown /// 5489 // electron transporter activity // Unknown	chrX:119907953-119909467 (+) // 98.57 // q24 /// chr10:88800756-88812433 (-) // 95.51 // q23.2	Urea cycle and metabolism of amino groups // KEGG /// Glutamate metabolism // KEGG /// Arginine and proline metabolism // KEGG /// D-Glutamine and D-glutamate metabolism // KEGG /// Nitrogen metabolism // KEGG
1562329_at	CSMD1	CUB and Sushi multiple domains 1	AB067477	64478	608397	Q96PZ7	---	---	---	chr8:2996175-3212178 (-) // 99.82 // p23.2	---
234229_at	---	---	AK024567	---	---	---	---	---	---	chr3:15880548-15882166 (-) // 44.31 // p25.1	---
235849_at	MGC45780	hypothetical protein MGC45780	BE787752	286133	---	Q6UXZ1 /// Q6ZMJ2 /// Q7Z4A1 /// Q8N4Z7	6817 // phosphate transport // Unknown	5737 // cytoplasm // Unknown /// 16020 // membrane // Unknown	4872 // receptor activity // Unknown /// 5044 // scavenger receptor activity // Unknown	chr8:27783559-27784198 (-) // 89.69 // p21.1	---
206991_s_at	CCR5	chemokine (C-C motif) receptor 5	NM_000579	1234	601373	P51681 /// P68104 /// O14694	7186 // G-protein coupled receptor protein signaling pathway // Unknown	16021 // integral to membrane // Unknown	1584 // rhodopsin-like receptor activity // Unknown /// 4872 // receptor activity // Unknown /// 16493 // C-C chemokine receptor activity // Unknown	chr3_random:886374-892428 (+) // 97.07 // /// chr3:46386636-46392695 (+) // 97.07 // p21.31	GPCRDB_Class_A_Rhodopsin-like // GenMAPP /// Peptide_GPCRs // GenMAPP /// GPCRDB_Other // GenMAPP
204152_s_at	MFNG	manic fringe homolog (Drosophila)	AI738965	4242	602577	O00587	7389 // pattern specification // Unknown	5615 // extracellular space // Unknown /// 5794 // Golgi apparatus // Unknown /// 16021 // integral to membrane // Unknown	16757 // transferase activity, transferring glycosyl groups // Unknown	chr22:36189605-36206932 (-) // 87.36 // q13.1	---
209164_s_at	CYB561	cytochrome b-561	BC002976	1534	600019	P49447	6118 // electron transport // Unknown	5887 // integral to plasma membrane // Unknown	4128 // cytochrome-b5 reductase activity // Unknown	chr17:58864163-58877395 (-) // 88.74 // q23.3	---
209505_at	NR2F1	Nuclear receptor subfamily 2, group F, member 1	AI951185	7025	132890	P10589	6355 // regulation of transcription, DNA-dependent // Unknown /// 7165 // signal transduction // Unknown	5634 // nucleus // Unknown	3700 // transcription factor activity // Unknown /// 3706 // ligand-regulated transcription factor activity // Unknown /// 3707 // steroid hormone receptor activity // Unknown /// 3713 // transcription coactivator activity // Unknown	chr5:92946397-92956073 (+) // 95.21 // q15	Nuclear_Receptors // GenMAPP
220523_at	EFHC2	EF-hand domain (C-terminal) containing 2	NM_024822	80258	---	Q68DK4 /// Q8NEI0 /// Q9H5X5 /// Q9H653	---	---	5509 // calcium ion binding // Unknown	chrX:43763382-43794064 (-) // 88.59 // p11.3	---
1555031_at	---	AngRem52	AY032980	---	---	Q86VZ9 /// Q8NHX3	---	---	---	---	---
206999_at	IL12RB2	interleukin 12 receptor, beta 2	NM_001559	3595	601642	Q99665	7166 // cell surface receptor linked signal transduction // Unknown /// 8284 // positive regulation of cell proliferation // Unknown	5887 // integral to plasma membrane // Unknown	4872 // receptor activity // Unknown /// 4907 // interleukin receptor activity // Unknown	chr1:67485067-67574604 (+) // 90.4 // p31.2	---
1563209_a_at	---	Homo sapiens, clone IMAGE:4513167, mRNA	BC035876	---	---	Q6ZN71	---	---	---	chr20:15915370-15978686 (+) // 70.38 // p12.1	---
205651_x_at	RAPGEF4	Rap guanine nucleotide exchange factor (GEF) 4	NM_007023	11069	606058	Q8WZA2	6468 // protein amino acid phosphorylation // Unknown /// 6887 // exocytosis // Unknown /// 7264 // small GTPase mediated signal transduction // Unknown	5952 // cAMP-dependent protein kinase complex // Unknown	5085 // guanyl-nucleotide exchange factor activity // Unknown /// 8603 // cAMP-dependent protein kinase regulator activity // Unknown /// 30552 // 3',5'-cAMP binding // Unknown	chr2:173426113-173743122 (+) // 98.78 // q31.1	---
1553605_a_at	ABCA13	ATP-binding cassette, sub-family A (ABC1), member 13	NM_152701	154664	607807	Q6ZN63 /// Q6ZR18 /// Q6ZR43 /// Q6ZTT7 /// Q86UQ4 /// Q86WI2 /// Q8N248 /// Q8N265 /// Q5HYK4	---	---	166 // nucleotide binding // Unknown /// 5524 // ATP binding // Unknown /// 16887 // ATPase activity // Unknown	chr7:48337073-48464348 (+) // 85.71 // p12.3	---
211382_s_at	TACC2	transforming, acidic coiled-coil containing protein 2	AF220152	10579	605302	O95359 /// Q5U5T7 /// Q86WG6 /// Q86WG7 /// Q8TCK9 /// Q8WZ39 /// Q9BVQ1	---	5634 // nucleus // Unknown	---	chr10:123959546-124003841 (+) // 93.3 // q26.13	---
226777_at	ADAM12	A disintegrin and metalloproteinase domain 12 (meltrin alpha)	AA147933	8038	602714	O43184 /// Q6P9E3 /// Q6UWB0	6508 // proteolysis and peptidolysis // Unknown /// 7155 // cell adhesion // Unknown /// 7520 // myoblast fusion // Unknown	5886 // plasma membrane // Unknown /// 16021 // integral to membrane // Unknown	4222 // metalloendopeptidase activity // Unknown /// 5515 // protein binding // Unknown /// 8270 // zinc ion binding // Unknown /// 16787 // hydrolase activity // Unknown	chr10:127690949-127692767 (-) // 97.31 // q26.2	---
242468_at	---	---	AA767317	---	---	---	---	---	---	chr20:15825195-15825936 (-) // 70.61 // p12.1	---
220254_at	LRP12	low density lipoprotein-related protein 12	NM_013437	29967	---	Q9Y561 /// Q68DE8 /// Q8WVX8 /// Q9H983	6897 // endocytosis // Unknown /// 7165 // signal transduction // Unknown /// 40008 // regulation of growth // Unknown	5624 // membrane fraction // Unknown /// 5887 // integral to plasma membrane // Unknown /// 5905 // coated pit // Unknown	4872 // receptor activity // Unknown /// 5041 // low-density lipoprotein receptor activity // Unknown /// 5515 // protein binding // Unknown	chr8:105571637-105670344 (-) // 98.51 // q22.3	---
1561854_at	---	Clone BGL1 mRNA sequence	AY034469	---	---	---	---	---	---	chr11:5261333-5262528 (-) // 64.06 // p15.4	---
1557107_at	LOC286002	hypothetical protein LOC286002	BC037315	286002	---	Q8TBI2	---	---	---	chr7:106891036-106896143 (-) // 73.46 // q22.3	---
1561713_at	---	Homo sapiens, clone IMAGE:5269990, mRNA	BC040595	---	---	---	---	---	---	chrX:126520147-126522027 (-) // 12.8 // q25	---
1554188_at	MGC50104	Similar to RIKEN cDNA 1810046K07 gene	BC039669	341032	---	Q8IXP5	---	---	---	chr11:110631916-110662335 (+) // 98.77 // q23.1	---
233590_at	---	CDNA FLJ10696 fis, clone NT2RP3000484	AU152240	---	---	---	---	---	---	chr2:12097851-12669072 (+) // 90.38 // p25.1	---
222810_s_at	RASAL2	RAS protein activator like 2	BF435513	9462	606136	Q9UJF2 /// Q6P4F9	7165 // signal transduction // Unknown	---	5096 // GTPase activator activity // Unknown /// 5099 // Ras GTPase activator activity // Unknown	chr1:175042262-175175350 (+) // 99.92 // q25.2	---
228850_s_at	SLIT2	Slit homolog 2 (Drosophila)	AI963304	9353	603746	O94813	1657 // ureteric bud development // Unknown /// 6935 // chemotaxis // Unknown /// 7155 // cell adhesion // Unknown /// 7399 // neurogenesis // Unknown /// 7509 // mesoderm migration // Unknown /// 7608 // perception of smell // Unknown /// 8038 // neuronal cell recognition // Unknown /// 8045 // motor axon guidance // Unknown /// 8347 // glia cell migration // Unknown /// 50772 // positive regula…	5615 // extracellular space // Unknown	5102 // receptor binding // Unknown /// 5198 // structural molecule activity // Unknown /// 5509 // calcium ion binding // Unknown /// 5515 // protein binding // Unknown	chr4:20297809-20298453 (+) // 90.18 // p15.31	---
204088_at	P2RX4	purinergic receptor P2X, ligand-gated ion channel, 4	NM_002560	5025	600846	Q99571 /// Q5U089 /// Q8N4N1	6811 // ion transport // Unknown /// 7165 // signal transduction // Unknown	5887 // integral to plasma membrane // Unknown /// 16020 // membrane // Unknown /// 16021 // integral to membrane // Unknown	4872 // receptor activity // Unknown /// 4931 // ATP-gated cation channel activity // Unknown /// 5216 // ion channel activity // Unknown /// 5524 // ATP binding // Unknown	chr12:120110661-120134267 (+) // 99.78 // q24.31	---
207638_at	PRSS7	protease, serine, 7 (enterokinase)	NM_002772	5651	226200 /// 606635	P98073	6508 // proteolysis and peptidolysis // Unknown	5903 // brush border // Unknown /// 16021 // integral to membrane // Unknown	4263 // chymotrypsin activity // Unknown /// 4275 // enteropeptidase activity // Unknown /// 4295 // trypsin activity // Unknown /// 5044 // scavenger receptor activity // Unknown /// 16787 // hydrolase activity // Unknown	chr21:18563560-18697844 (-) // 98.62 // q21.1	---
233587_s_at	SIPA1L2	signal-induced proliferation-associated 1 like 2	AK022852	57568	---	Q9P2F8 /// Q641Q4	---	---	5096 // GTPase activator activity // Unknown /// 5515 // protein binding // Unknown	chr1:228840944-228888231 (-) // 99.89 // q42.2	---
206300_s_at	PTHLH	parathyroid hormone-like hormone	NM_002820	5744	168470	P12272 /// Q15252	7267 // cell-cell signaling // Unknown /// 7565 // pregnancy // Unknown /// 7595 // lactation // Unknown /// 8284 // positive regulation of cell proliferation // Unknown /// 8285 // negative regulation of cell proliferation // Unknown /// 8544 // epidermis development // Unknown /// 46058 // cAMP metabolism // Unknown	5615 // extracellular space // Unknown /// 5634 // nucleus // Unknown /// 5737 // cytoplasm // Unknown	5179 // hormone activity // Unknown	chr12:28006787-28014161 (-) // 92.66 // p11.22	---
228101_at	---	MRNA; cDNA DKFZp761L1121 (from clone DKFZp761L1121)	AI693178	---	---	---	---	---	---	chr9:69272003-69273305 (-) // 94.11 // q21.11	---
210517_s_at	AKAP12	A kinase (PRKA) anchor protein (gravin) 12	AB003476	9590	604698	Q02952 /// Q68D82 /// Q6NSG9 /// Q86TJ9 /// Q86TK7	6605 // protein targeting // Unknown /// 7165 // signal transduction // Unknown /// 7186 // G-protein coupled receptor protein signaling pathway // Unknown	5737 // cytoplasm // Unknown	5515 // protein binding // Unknown /// 51018 // protein kinase A binding // Unknown	chr6:151738936-151770022 (+) // 99.97 // q25.1	G_Protein_Signaling // GenMAPP
205180_s_at	ADAM8	a disintegrin and metalloproteinase domain 8 /// a disintegrin and metalloproteinase domain 8	NM_001109	101	602267	P78325 /// Q6ZVV1	6508 // proteolysis and peptidolysis // Unknown	5887 // integral to plasma membrane // Unknown	4222 // metalloendopeptidase activity // Unknown /// 8270 // zinc ion binding // Unknown /// 16787 // hydrolase activity // Unknown	---	---
1554732_at	MGC24125	hypothetical protein MGC24125	BC020886	152766	---	Q8NEQ2	---	---	---	chr4:185637150-185650279 (-) // 37.43 // q35.1	---
235278_at	---	Homo sapiens, clone IMAGE:4513167, mRNA	BF032500	---	---	Q6ZN71	---	---	---	chr20:15980536-15981842 (+) // 94.09 // p12.1	---
213915_at	NKG7	natural killer cell group 7 sequence	NM_005601	4818	606008	Q16617	---	5887 // integral to plasma membrane // Unknown	---	chr19:56566685-56567781 (-) // 87.75 // q13.41	---
225150_s_at	RTKN	rhotekin	BC004558	6242	602288	Q8WVN1 /// Q96PT6 /// Q9BST9 /// Q9HB05	7165 // signal transduction // Unknown	5622 // intracellular // Unknown	5515 // protein binding // Unknown	chr2:74564510-74581175 (-) // 99.78 // p13.1	G13_Signaling_Pathway // GenMAPP
208791_at	CLU	clusterin (complement lysis inhibitor, SP-40,40, sulfated glycoprotein 2, testosterone-repressed prostate message 2, apolipoprotein J)	M25915	1191	185430	P10909 /// Q6LDQ3	6629 // lipid metabolism // Unknown /// 6915 // apoptosis // Unknown /// 6958 // complement activation, classical pathway // Unknown /// 7338 // fertilization (sensu Metazoa) // Unknown /// 8219 // cell death // Unknown	5576 // extracellular region // Unknown	---	chr8:27511568-27524745 (-) // 99.88 // p21.1	---
201431_s_at	DPYSL3	dihydropyrimidinase-like 3	NM_001387	1809	601168	Q14195 /// Q6DEN2 /// Q8IXW6	6139 // nucleobase, nucleoside, nucleotide and nucleic acid metabolism // Unknown /// 7165 // signal transduction // Unknown /// 7399 // neurogenesis // Unknown	---	4157 // dihydropyrimidinase activity // Unknown /// 16787 // hydrolase activity // Unknown	chr5:146750566-146813429 (-) // 99.5 // q32	---
216660_at	MYO7B	myosin VIIB	AK000145	4648	606541	Q6PIF6 /// Q8TEE1 /// Q5HCH8	---	5856 // cytoskeleton // Unknown	---	chr2:128047527-128050005 (+) // 60.51 // q14.3	---
227372_s_at	BAIAP2L1	BAI1-associated protein 2-like 1	AA496034	55971	---	Q6ZVP0 /// Q96NU5 /// Q9H5F5 /// Q9UHR4	---	---	4872 // receptor activity // Unknown /// 8083 // growth factor activity // Unknown /// 16301 // kinase activity // Unknown	chr7:97565618-97675070 (-) // 91.96 // q21.3	---
234413_at	---	---	AL049710	---	---	---	---	---	---	chr1:55550401-55551051 (-) // 100.0 // p32.3	---
1556096_s_at	UNC13C	unc-13 homolog C (C. elegans)	AL834407	145790	---	Q8NB66 /// Q6ZT32	6887 // exocytosis // Unknown /// 7242 // intracellular signaling cascade // Unknown	19717 // synaptosome // Unknown	19992 // diacylglycerol binding // Unknown	chr15:52314519-52708095 (+) // 98.68 // q21.3	---
241049_at	GRM7	glutamate receptor, metabotropic 7	AA018686	2917	604101	Q14831	7186 // G-protein coupled receptor protein signaling pathway // Unknown /// 7194 // negative regulation of adenylate cyclase activity // Unknown /// 7268 // synaptic transmission // Unknown /// 7608 // perception of smell // Unknown	5887 // integral to plasma membrane // Unknown /// 16020 // membrane // Unknown /// 16021 // integral to membrane // Unknown	4872 // receptor activity // Unknown /// 8067 // metabotropic glutamate, GABA-B-like receptor activity // Unknown	chr3:7710150-7711152 (+) // 97.94 // p26.1	GPCRDB_Class_C_Metabotropic_glutamate_pheromone // GenMAPP
207714_s_at	SERPINH1	serine (or cysteine) proteinase inhibitor, clade H (heat shock protein 47), member 1, (collagen binding protein 1)	NM_004353	871	600943	P50454 /// Q6NSJ6 /// Q6ZMS8	6457 // protein folding // Unknown /// 6986 // response to unfolded protein // Unknown	5783 // endoplasmic reticulum // Unknown	4867 // serine-type endopeptidase inhibitor activity // Unknown /// 5518 // collagen binding // Unknown /// 51082 // unfolded protein binding // Unknown	chr11:74955039-74961424 (+) // 91.27 // q13.5	S1P_Signaling // GenMAPP
235843_at	DGKG	Diacylglycerol kinase, gamma 90kDa	BF448158	1608	601854	P49619	7205 // protein kinase C activation // Unknown /// 7242 // intracellular signaling cascade // Unknown	---	4143 // diacylglycerol kinase activity // Unknown /// 5509 // calcium ion binding // Unknown /// 16740 // transferase activity // Unknown /// 19992 // diacylglycerol binding // Unknown	chr3:187477630-187478057 (-) // 43.31 // q27.2	Glycerolipid metabolism // KEGG /// Glycerophospholipid metabolism // KEGG /// Phosphatidylinositol signaling system // KEGG
205498_at	GHR	growth hormone receptor	NM_000163	2690	262500 /// 600946	P10912	1501 // skeletal development // Unknown /// 6897 // endocytosis // Unknown /// 40007 // growth // Unknown	5887 // integral to plasma membrane // Unknown	4872 // receptor activity // Unknown /// 4903 // growth hormone receptor activity // Unknown	chr5:42459782-42757736 (+) // 92.52 // p12	---
231063_at	MFAP3L	Microfibrillar-associated protein 3-like	AW014518	9848	---	O75121 /// Q9BVE1	---	16021 // integral to membrane // Unknown	---	chr4:171289908-171290384 (+) // 95.37 // q33	---
232707_at	LOC91464	hypothetical protein LOC91464	AK025181	91464	---	Q68DJ5	6355 // regulation of transcription, DNA-dependent // Unknown	5634 // nucleus // Unknown	3700 // transcription factor activity // Unknown	chr22:33786683-33807932 (+) // 88.51 // q12.3	---
1556773_at	PTHLH	Parathyroid hormone-like hormone	M31157	5744	168470	P12272 /// Q15252	7267 // cell-cell signaling // Unknown /// 7565 // pregnancy // Unknown /// 7595 // lactation // Unknown /// 8284 // positive regulation of cell proliferation // Unknown /// 8285 // negative regulation of cell proliferation // Unknown /// 8544 // epidermis development // Unknown /// 46058 // cAMP metabolism // Unknown	5615 // extracellular space // Unknown /// 5634 // nucleus // Unknown /// 5737 // cytoplasm // Unknown	5179 // hormone activity // Unknown	chr12:28005637-28007970 (-) // 91.79 // p11.22	---
214053_at	ERBB4	V-erb-a erythroblastic leukemia viral oncogene homolog 4 (avian)	AW772192	2066	600543	Q15303	6468 // protein amino acid phosphorylation // Unknown /// 7169 // transmembrane receptor protein tyrosine kinase signaling pathway // Unknown /// 7275 // development // Unknown /// 8283 // cell proliferation // Unknown	5887 // integral to plasma membrane // Unknown	4872 // receptor activity // Unknown /// 5006 // epidermal growth factor receptor activity // Unknown /// 5524 // ATP binding // Unknown /// 16740 // transferase activity // Unknown	chr2:212065951-212067749 (-) // 95.04 // q34	---
228716_at	LOC401059	hypothetical gene supported by AK096885; AK098084	BG494007	401059	---	---	---	---	---	chr3:24135225-24135961 (-) // 93.07 // p24.2	---
225536_at	BCLP	beta-casein-like protein	AL545105	113452	---	Q6UV18 /// Q8IVD0 /// Q969K7 /// Q9UM12	6096 // glycolysis // Unknown	---	4743 // pyruvate kinase activity // Unknown	chr1:33029289-33036099 (-) // 97.11 // p35.1	---
1563744_a_at	DISC1	Disrupted in schizophrenia 1	AK096457	27185	181500 /// 605210	Q9NRI5 /// Q8IXJ1 /// Q6ZRE3 /// Q8IXJ0	6306 // DNA methylation // Unknown	---	3677 // DNA binding // Unknown /// 8170 // N-methyltransferase activity // Unknown	chr1:228127232-228166555 (+) // 88.7 // q42.2	---
223948_s_at	TMPRSS3	transmembrane protease, serine 3	AB038160	64699	601072 /// 605316 /// 605511	P57727 /// Q5USC7 /// Q6ZNH3 /// Q8WY52 /// Q6ZMC3	6508 // proteolysis and peptidolysis // Unknown /// 7605 // perception of sound // Unknown	5783 // endoplasmic reticulum // Unknown /// 16021 // integral to membrane // Unknown	4263 // chymotrypsin activity // Unknown /// 4295 // trypsin activity // Unknown /// 5044 // scavenger receptor activity // Unknown /// 8233 // peptidase activity // Unknown /// 16787 // hydrolase activity // Unknown	chr21:42675054-42689269 (-) // 86.9 // q22.3	---
204999_s_at	ATF5	activating transcription factor 5	BC005174	22809	606398	Q9Y2D1 /// Q9BSA1	74 // regulation of cell cycle // Unknown /// 6355 // regulation of transcription, DNA-dependent // Unknown /// 6357 // regulation of transcription from Pol II promoter // Unknown	5634 // nucleus // Unknown	3677 // DNA binding // Unknown /// 3702 // RNA polymerase II transcription factor activity // Unknown /// 3714 // transcription corepressor activity // Unknown	chr19:55124282-55128367 (+) // 85.96 // q13.33	Smooth_muscle_contraction // GenMAPP
1561576_a_at	---	CDNA FLJ40163 fis, clone TESTI2015830	BE044459	---	---	---	---	---	---	chr2:182380610-182384776 (-) // 12.91 // q31.3	---
211756_at	PTHLH	parathyroid hormone-like hormone /// parathyroid hormone-like hormone	BC005961	5744	168470	P12272 /// Q15252	7267 // cell-cell signaling // Unknown /// 7565 // pregnancy // Unknown /// 7595 // lactation // Unknown /// 8284 // positive regulation of cell proliferation // Unknown /// 8285 // negative regulation of cell proliferation // Unknown /// 8544 // epidermis development // Unknown /// 46058 // cAMP metabolism // Unknown	5615 // extracellular space // Unknown /// 5634 // nucleus // Unknown /// 5737 // cytoplasm // Unknown	5179 // hormone activity // Unknown	chr12:28006529-28014268 (-) // 79.0 // p11.22	---
212560_at	SORL1	Sortilin-related receptor, L(DLR class) A repeats-containing	AV728268	6653	602005	Q92673	6869 // lipid transport // Unknown /// 6898 // receptor mediated endocytosis // Unknown /// 8203 // cholesterol metabolism // Unknown	5887 // integral to plasma membrane // Unknown	4888 // transmembrane receptor activity // Unknown /// 5319 // lipid transporter activity // Unknown	chr11:121006842-121009681 (+) // 98.38 // q23.3	---
203066_at	GALNAC4S-6ST	B cell RAG associated protein	NM_014863	51363	608277	O60338 /// O60474 /// Q86VM4 /// Q9H9P9 /// Q7LFX5	18 // regulation of DNA recombination // Unknown /// 19319 // hexose biosynthesis // Unknown /// 45577 // regulation of B-cell differentiation // Unknown	16021 // integral to membrane // Unknown	16740 // transferase activity // Unknown /// 50656 // 3'-phosphoadenosine 5'-phosphosulfate binding // Unknown /// 50659 // N-acetylgalactosamine 4-sulfate 6-O-sulfotransferase activity // Unknown	chr10:125757209-125841898 (-) // 96.54 // q26.13	---
210140_at	CST7	cystatin F (leukocystatin)	AF031824	8530	603253	O76096 /// Q7Z4J8	6955 // immune response // Unknown	---	4869 // cysteine protease inhibitor activity // Unknown	chr20:24877926-24888562 (+) // 100.0 // p11.21	---
243556_at	NGEF	neuronal guanine nucleotide exchange factor	R89026	25791	605991	Q6GMQ5 /// Q8N5V2 /// Q9NQD6	---	---	---	chr2:233578300-233660546 (-) // 89.87 // q37.1	---
229349_at	FLJ16517	FLJ16517 protein	AL039884	389421	---	Q6ZN17	6355 // regulation of transcription, DNA-dependent // Unknown	---	3677 // DNA binding // Unknown	chr6:105636632-105637899 (+) // 97.68 // q21 /// chr7:49322785-49324043 (-) // 91.97 // p12.3	---
228728_at	FLJ21986	hypothetical protein FLJ21986	BF724137	79974	---	Q6UXT1 /// Q86SV3 /// Q86T76 /// Q86T84 /// Q8N2T5 /// Q96NC9 /// Q9H6Q5	---	---	---	chr7:120505291-120531449 (+) // 97.31 // q31.31	---
200879_s_at	EPAS1	endothelial PAS domain protein 1	NM_001430	2034	603349	Q99814 /// Q96KZ1	1525 // angiogenesis // Unknown /// 6355 // regulation of transcription, DNA-dependent // Unknown /// 6366 // transcription from Pol II promoter // Unknown /// 7165 // signal transduction // Unknown /// 7275 // development // Unknown	5634 // nucleus // Unknown	3705 // RNA polymerase II transcription factor activity, enhancer binding // Unknown /// 3713 // transcription coactivator activity // Unknown /// 4871 // signal transducer activity // Unknown /// 35035 // histone acetyltransferase binding // Unknown	chr2:46436552-46523506 (+) // 99.93 // p21	---
226281_at	DNER	delta-notch-like EGF repeat-containing transmembrane	BF059512	92737	607299	Q8IYT0 /// Q8TB42 /// Q9NTF1 /// Q8NFT8	---	---	---	chr2:230047852-230278675 (-) // 98.66 // q36.3	---
233276_at	FBXL7	F-box and leucine-rich repeat protein 7	AU146390	23194	605656	Q9UJT9	6512 // ubiquitin cycle // Unknown	---	---	chr5:15695969-15697413 (+) // 91.17 // p15.1	---
201123_s_at	EIF5A	eukaryotic translation initiation factor 5A	NM_001970	1984	600187	P63241 /// Q7Z4L1 /// Q8WXQ9	6412 // protein biosynthesis // Unknown /// 6413 // translational initiation // Unknown	---	3676 // nucleic acid binding // Unknown /// 3743 // translation initiation factor activity // Unknown	chr10:80942383-80942926 (+) // 95.7 // q22.3 /// chr10:81262285-81262828 (+) // 95.52 // q22.3 /// chr17:7153655-7155903 (+) // 96.42 // p13.1 /// chr10:81996904-81997447 (-) // 95.34 // q22.3	Translation_Factors // GenMAPP
244493_at	---	Homo sapiens, clone IMAGE:5261153, mRNA	AI655633	---	---	---	---	---	---	chr7:106706836-106707401 (+) // 99.12 // q22.3	---
232036_at	KNS2	Kinesin 2 60/70kDa	AK024714	3831	600025	Q07866 /// Q7Z5D5 /// Q8NAC7	---	5871 // kinesin complex // Unknown	3777 // microtubule motor activity // Unknown /// 5488 // binding // Unknown	chr14:103228043-103230180 (+) // 91.05 // q32.33	---

## Sheet: Sheet2
	Gene Symbol	Gene Title	Representative Public ID	LocusLink	OMIM	SwissProt	Gene Ontology Biological Process	Gene Ontology Cellular Component	Gene Ontology Molecular Function	Alignments	Pathway
220445_s_at	CSAG2	CSAG family, member 2	NM_004909	9598	---	Q9Y5P2 /// Q5ZEY7	42493 // response to drug // Unknown	---	---	chrX:151598301-151599298 (+) // 61.45 // q28 /// chrX:151579086-151580079 (+) // 59.45 // q28 /// chrX:151547318-151548315 (-) // 61.45 // q28 /// chrX:151566547-151567543 (-) // 58.7 // q28	---
213113_s_at	SLC43A3	solute carrier family 43, member 3	AI630178	29015	---	Q8NBI5 /// Q9UHU3 /// Q9NSS4	---	---	---	chr11:56931002-56951136 (-) // 82.34 // q12.1	---
240413_at	PYHIN1	pyrin and HIN domain family, member 1	AI827431	149628	---	Q6K0P6 /// Q6K0P7 /// Q6K0P8 /// Q6K0P9 /// Q8WW65	---	---	---	chr1:155759559-155759911 (+) // 69.89 // q23.1	---
226425_at	RSNL2	restin-like 2	AU144247	79745	---	Q7Z4U3 /// Q8N3C7 /// Q96BR7 /// Q96MA5 /// Q9H7C0	---	---	---	chr2:29308898-29318325 (+) // 91.8 // p23.2	---
213056_at	FRMD4B	FERM domain containing 4B	AU145019	23150	---	Q9Y2L6 /// Q6PEW6 /// Q8TAI3	---	5856 // cytoskeleton // Unknown	5488 // binding // Unknown	chr3:69301835-69517914 (-) // 96.4 // p14.1	---
235463_s_at	LASS6	LAG1 longevity assurance homolog 6 (S. cerevisiae)	AI081356	253782	---	Q6ZMG9	6355 // regulation of transcription, DNA-dependent // Unknown /// 8610 // lipid biosynthesis // Unknown	5634 // nucleus // Unknown /// 16021 // integral to membrane // Unknown	3700 // transcription factor activity // Unknown	chr2:169447674-169452278 (+) // 98.86 // q24.3	---
206698_at	XK	Kell blood group precursor (McLeod phenotype)	NM_021083	7504	314850	P51811 /// Q8IUK6	6810 // transport // Unknown /// 6865 // amino acid transport // Unknown	16021 // integral to membrane // Unknown	5215 // transporter activity // Unknown /// 15171 // amino acid transporter activity // Unknown	chrX:37301324-37347594 (+) // 96.96 // p21.1	---
221168_at	PRDM13	PR domain containing 13	NM_021620	59336	---	Q9H4Q3 /// Q7Z5E7	6355 // regulation of transcription, DNA-dependent // Unknown	5634 // nucleus // Unknown	3677 // DNA binding // Unknown /// 8270 // zinc ion binding // Unknown	chr6:100161370-100170175 (+) // 95.64 // q16.3	---
202052_s_at	RAI14	retinoic acid induced 14	NM_015577	26064	606586	Q6V1W9 /// Q7Z5I4 /// Q7Z733 /// Q9P0K7 /// Q9P2L2 /// Q9Y3T5	---	---	---	chr5:34692274-34868473 (+) // 98.13 // p13.2	---
229974_at	EVC2	Ellis van Creveld syndrome 2 (limbin)	AA234305	132884	225500 /// 607261	Q86UK5	---	16021 // integral to membrane // Unknown	---	chr4:5682234-5682733 (-) // 95.04 // p16.2	---
210002_at	GATA6	GATA binding protein 6	D87811	2627	601656	Q92908	6355 // regulation of transcription, DNA-dependent // Unknown /// 7517 // muscle development // Unknown /// 45941 // positive regulation of transcription // Unknown	5634 // nucleus // Unknown	3700 // transcription factor activity // Unknown /// 8270 // zinc ion binding // Unknown /// 16563 // transcriptional activator activity // Unknown	chr18:18005276-18035935 (+) // 95.22 // q11.2	---
209318_x_at	PLAGL1	pleiomorphic adenoma gene-like 1	BG547855	5325	601410 /// 603044	Q9UM63 /// Q68DN7 /// Q92981 /// O76019 /// Q7Z3V8	6355 // regulation of transcription, DNA-dependent // Unknown /// 6917 // induction of apoptosis // Unknown /// 7050 // cell cycle arrest // Unknown	5634 // nucleus // Unknown	3676 // nucleic acid binding // Unknown /// 3677 // DNA binding // Unknown /// 8270 // zinc ion binding // Unknown	chr6:144302842-144371045 (-) // 91.99 // q24.2	---
224862_at	GNAQ	Guanine nucleotide binding protein (G protein), q polypeptide	BF969428	2776	600998	P50148 /// Q6NT27	6471 // protein amino acid ADP-ribosylation // Unknown /// 7165 // signal transduction // Unknown /// 7186 // G-protein coupled receptor protein signaling pathway // Unknown /// 7202 // phospholipase C activation // Unknown /// 7596 // blood coagulation // Unknown	5737 // cytoplasm // Unknown /// 5834 // heterotrimeric G-protein complex // Unknown /// 5886 // plasma membrane // Unknown	3924 // GTPase activity // Unknown /// 4871 // signal transducer activity // Unknown /// 5525 // GTP binding // Unknown	chr2:132011284-132012759 (-) // 49.97 // q21.1 /// chr9:77560564-77563443 (-) // 97.92 // q21.2	G_Protein_Signaling // GenMAPP /// Calcium_regulation_in_cardiac_cells // GenMAPP /// Smooth_muscle_contraction // GenMAPP
238493_at	ZNF506	zinc finger protein 506	AI559570	91115	---	Q5JVG8	---	---	---	chr19:19764519-19765410 (-) // 89.02 // p13.11	---
205501_at	---	CDNA FLJ25677 fis, clone TST04054	AI143879	---	---	---	---	---	---	chr6:165711188-166045996 (-) // 96.32 // q27	---
218330_s_at	NAV2	neuron navigator 2	NM_018162	89797	607026	Q8IVK6 /// Q8IVL1 /// Q8NHC9 /// Q8NHD0 /// Q8TDE9 /// Q8TDF0 /// Q8TEB3 /// Q96B30 /// Q9NUZ6 /// Q9P2C8	---	---	166 // nucleotide binding // Unknown /// 17111 // nucleoside-triphosphatase activity // Unknown	chr11:20033824-20099720 (+) // 97.03 // p15.1	---
230964_at	FREM2	FRAS1 related extracellular matrix protein 2	N66307	341640	608945	Q6N057 /// Q6ZSB4 /// Q7Z305 /// Q7Z341	7154 // cell communication // Unknown /// 7156 // homophilic cell adhesion // Unknown	16021 // integral to membrane // Unknown	5509 // calcium ion binding // Unknown	chr13:38357610-38358072 (+) // 97.26 // q13.3	---
207002_s_at	PLAGL1	pleiomorphic adenoma gene-like 1	NM_002656	5325	601410 /// 603044	Q9UM63 /// Q68DN7 /// Q92981 /// O76019 /// Q7Z3V8	6355 // regulation of transcription, DNA-dependent // Unknown /// 6917 // induction of apoptosis // Unknown /// 7050 // cell cycle arrest // Unknown	5634 // nucleus // Unknown	3676 // nucleic acid binding // Unknown /// 3677 // DNA binding // Unknown /// 8270 // zinc ion binding // Unknown	chr6:144303126-144327698 (-) // 96.29 // q24.2	---
235051_at	C3orf6	chromosome 3 open reading frame 6	BF696931	152137	---	Q86VH7 /// Q8IVM0	---	---	---	chr3:192594734-192596081 (+) // 94.44 // q28	---
209988_s_at	ASCL1	achaete-scute complex-like 1 (Drosophila)	BC001638	429	100790	P50553	6357 // regulation of transcription from Pol II promoter // Unknown /// 7399 // neurogenesis // Unknown /// 30154 // cell differentiation // Unknown	5634 // nucleus // Unknown	3700 // transcription factor activity // Unknown	chr12:101853930-101856754 (+) // 93.61 // q23.2 /// chr12_random:385168-386286 (+) // 42.77 //	---
231804_at	LGR7	leucine-rich repeat-containing G protein-coupled receptor 7	AI805323	59350	606654	Q9HBX9	7165 // signal transduction // Unknown /// 7186 // G-protein coupled receptor protein signaling pathway // Unknown	16021 // integral to membrane // Unknown	1584 // rhodopsin-like receptor activity // Unknown	chr4:159800733-159931283 (+) // 96.61 // q32.1	GPCRDB_Other // GenMAPP /// Smooth_muscle_contraction // GenMAPP
221630_s_at	DDX4	DEAD (Asp-Glu-Ala-Asp) box polypeptide 4	AY004154	54514	605281	Q9NQI0	7275 // development // Unknown	---	3676 // nucleic acid binding // Unknown /// 5524 // ATP binding // Unknown /// 8026 // ATP-dependent helicase activity // Unknown /// 16787 // hydrolase activity // Unknown	chr5:55070535-55148161 (+) // 99.73 // q11.2	---
204971_at	CSTA	cystatin A (stefin A)	NM_005213	1475	184600	P01040	---	5622 // intracellular // Unknown	4869 // cysteine protease inhibitor activity // Unknown	chr3:123526784-123543201 (+) // 99.77 // q21.1	---
236280_at	---	Transcribed locus	AI225238	---	---	---	---	---	---	chrX:78024678-78025369 (+) // 65.25 // q21.1	---
227747_at	---	---	AA772172	---	---	---	---	---	---	chr11:117602620-117603784 (-) // 96.37 // q23.3	---
231361_at	NLGN1	Neuroligin 1	AI912122	22871	600568	Q8N2Q7	6605 // protein targeting // Unknown /// 7155 // cell adhesion // Unknown /// 7416 // synaptogenesis // Unknown /// 16080 // synaptic vesicle targeting // Unknown /// 16339 // calcium-dependent cell-cell adhesion // Unknown /// 45161 // ion channel clustering // Unknown /// 45664 // regulation of neuron differentiation // Unknown	5887 // integral to plasma membrane // Unknown /// 45202 // synapse // Unknown	3824 // catalytic activity // Unknown /// 16789 // carboxylic ester hydrolase activity // Unknown /// 42043 // neurexin binding // Unknown	chr3:175486670-175487136 (+) // 100.0 // q26.31	---
201117_s_at	CPE	carboxypeptidase E	NM_001873	1363	114855	P16870	6464 // protein modification // Unknown /// 6508 // proteolysis and peptidolysis // Unknown /// 7218 // neuropeptide signaling pathway // Unknown /// 8152 // metabolism // Unknown	5886 // plasma membrane // Unknown	4180 // carboxypeptidase activity // Unknown /// 4182 // carboxypeptidase A activity // Unknown /// 4183 // carboxypeptidase E activity // Unknown /// 8237 // metallopeptidase activity // Unknown /// 16787 // hydrolase activity // Unknown	chr4:166657698-166777081 (+) // 97.18 // q32.3	---
213539_at	CD3D	CD3D antigen, delta polypeptide (TiT3 complex)	NM_000732	915	186790 /// 600802	---	6461 // protein complex assembly // Unknown /// 7166 // cell surface receptor linked signal transduction // Unknown /// 42110 // T-cell activation // Unknown /// 45059 // positive thymic T-cell selection // Unknown	5737 // cytoplasm // Unknown /// 16021 // integral to membrane // Unknown /// 42101 // T-cell receptor complex // Unknown	4888 // transmembrane receptor activity // Unknown /// 5515 // protein binding // Unknown /// 46982 // protein heterodimerization activity // Unknown	chr11:117488749-117718641 (-) // 83.62 // q23.3	---
204105_s_at	NRCAM	neuronal cell adhesion molecule	NM_005010	4897	601581	Q92823 /// Q6QRP2	1764 // neuronal migration // Unknown /// 7413 // axonal fasciculation // Unknown /// 7416 // synaptogenesis // Unknown /// 7417 // central nervous system development // Unknown /// 16337 // cell-cell adhesion // Unknown /// 30516 // regulation of axon extension // Unknown /// 45162 // clustering of voltage-gated sodium channels // Unknown /// 45666 // positive regulation of neuron differentiatio…	5887 // integral to plasma membrane // Unknown /// 9897 // external side of plasma membrane // Unknown /// 43005 // neuronal cell projection // Unknown	5515 // protein binding // Unknown /// 30506 // ankyrin binding // Unknown	chr7:107382044-107690721 (-) // 99.89 // q31.1	---
219926_at	POPDC3	popeye domain containing 3	NM_022361	64208	605824	Q9HBV1	---	16021 // integral to membrane // Unknown	---	chr6:105712849-105716615 (-) // 97.8 // q21	---
227140_at	INHBA	Inhibin, beta A (activin A, activin AB alpha polypeptide)	AI343467	3624	147290	P08476 /// Q9HBP0 /// Q5HYA2	1501 // skeletal development // Unknown /// 1541 // ovarian follicle development // Unknown /// 6917 // induction of apoptosis // Unknown /// 6952 // defense response // Unknown /// 7050 // cell cycle arrest // Unknown /// 7166 // cell surface receptor linked signal transduction // Unknown /// 7267 // cell-cell signaling // Unknown /// 7399 // neurogenesis // Unknown /// 7498 // mesoderm developm…	5576 // extracellular region // Unknown	5125 // cytokine activity // Unknown /// 5160 // transforming growth factor beta receptor binding // Unknown /// 5179 // hormone activity // Unknown /// 5515 // protein binding // Unknown /// 8083 // growth factor activity // Unknown /// 17106 // activin inhibitor activity // Unknown	chr7:41497951-41500019 (-) // 94.13 // p14.1	TGF_Beta_Signaling_Pathway // GenMAPP
1556794_at	---	CDNA FLJ33615 fis, clone BRAMY2018396	AI740788	---	---	---	---	---	---	---	---
230644_at	LRFN5	leucine rich repeat and fibronectin type III domain containing 5	AI375083	145581	---	Q96NI6	---	---	---	chr14:41430871-41443502 (+) // 100.0 // q21.1	---
224973_at	FAM46A	family with sequence similarity 46, member A	AL078599	55603	---	Q8NFZ9 /// Q96IP4 /// Q9NXV5 /// Q9BW32	---	---	---	chr6:82512165-82519210 (-) // 94.13 // q14.1	---
204379_s_at	FGFR3	fibroblast growth factor receptor 3 (achondroplasia, thanatophoric dwarfism)	NM_000142	2261	100800 /// 109800 /// 134934 /// 146000 /// 187600 /// 602849 /// 603956	P22607 /// Q96T34 /// Q96T35 /// Q96T36 /// Q9NRB6	165 // MAPKKK cascade // Unknown /// 1501 // skeletal development // Unknown /// 6468 // protein amino acid phosphorylation // Unknown /// 7259 // JAK-STAT cascade // Unknown /// 8543 // fibroblast growth factor receptor signaling pathway // Unknown /// 16049 // cell growth // Unknown	5887 // integral to plasma membrane // Unknown	4713 // protein-tyrosine kinase activity // Unknown /// 4872 // receptor activity // Unknown /// 5007 // fibroblast growth factor receptor activity // Unknown /// 5524 // ATP binding // Unknown /// 16740 // transferase activity // Unknown	chr4:1762853-1777829 (+) // 95.75 // p16.3	---
202615_at	GNAQ	guanine nucleotide binding protein (G protein), q polypeptide	BF222895	2776	600998	P50148 /// Q6NT27	6471 // protein amino acid ADP-ribosylation // Unknown /// 7165 // signal transduction // Unknown /// 7186 // G-protein coupled receptor protein signaling pathway // Unknown /// 7202 // phospholipase C activation // Unknown /// 7596 // blood coagulation // Unknown	5737 // cytoplasm // Unknown /// 5834 // heterotrimeric G-protein complex // Unknown /// 5886 // plasma membrane // Unknown	3924 // GTPase activity // Unknown /// 4871 // signal transducer activity // Unknown /// 5525 // GTP binding // Unknown	chr2:132012165-132016389 (-) // 93.34 // q21.1 /// chr9:77562838-77875928 (-) // 96.04 // q21.2	G_Protein_Signaling // GenMAPP /// Calcium_regulation_in_cardiac_cells // GenMAPP /// Smooth_muscle_contraction // GenMAPP
219532_at	ELOVL4	elongation of very long chain fatty acids (FEN1/Elo2, SUR4/Elo3, yeast)-like 4	NM_022726	6785	600110 /// 605512	Q9GZR5	6633 // fatty acid biosynthesis // Unknown /// 7601 // visual perception // Unknown	5783 // endoplasmic reticulum // Unknown /// 16021 // integral to membrane // Unknown	8020 // G-protein coupled photoreceptor activity // Unknown	chr6:80681254-80713862 (-) // 97.1 // q14.1	---
1552715_a_at	LGR7	leucine-rich repeat-containing G protein-coupled receptor 7	NM_021634	59350	606654	Q9HBX9	7165 // signal transduction // Unknown /// 7186 // G-protein coupled receptor protein signaling pathway // Unknown	16021 // integral to membrane // Unknown	1584 // rhodopsin-like receptor activity // Unknown	chr4:159800504-159930812 (+) // 95.77 // q32.1	GPCRDB_Other // GenMAPP /// Smooth_muscle_contraction // GenMAPP
224861_at	GNAQ	Guanine nucleotide binding protein (G protein), q polypeptide	AA628423	2776	600998	P50148 /// Q6NT27	6471 // protein amino acid ADP-ribosylation // Unknown /// 7165 // signal transduction // Unknown /// 7186 // G-protein coupled receptor protein signaling pathway // Unknown /// 7202 // phospholipase C activation // Unknown /// 7596 // blood coagulation // Unknown	5737 // cytoplasm // Unknown /// 5834 // heterotrimeric G-protein complex // Unknown /// 5886 // plasma membrane // Unknown	3924 // GTPase activity // Unknown /// 4871 // signal transducer activity // Unknown /// 5525 // GTP binding // Unknown	chr2:132011284-132012759 (-) // 49.97 // q21.1 /// chr9:77560564-77563443 (-) // 97.92 // q21.2	G_Protein_Signaling // GenMAPP /// Calcium_regulation_in_cardiac_cells // GenMAPP /// Smooth_muscle_contraction // GenMAPP
214146_s_at	PPBP	pro-platelet basic protein (chemokine (C-X-C motif) ligand 7)	R64130	5473	121010	P02775	74 // regulation of cell cycle // Unknown /// 6935 // chemotaxis // Unknown /// 6955 // immune response // Unknown /// 8283 // cell proliferation // Unknown /// 15758 // glucose transport // Unknown /// 42742 // defense response to bacteria // Unknown	5576 // extracellular region // Unknown	5355 // glucose transporter activity // Unknown /// 8009 // chemokine activity // Unknown /// 8083 // growth factor activity // Unknown	chr4:75217792-75218406 (-) // 97.5 // q13.3	---
214022_s_at	IFITM1	interferon induced transmembrane protein 1 (9-27)	AA749101	8519	604456	P13164	74 // regulation of cell cycle // Unknown /// 6955 // immune response // Unknown /// 7166 // cell surface receptor linked signal transduction // Unknown /// 8285 // negative regulation of cell proliferation // Unknown /// 9607 // response to biotic stimulus // Unknown	5886 // plasma membrane // Unknown /// 16021 // integral to membrane // Unknown	5057 // receptor signaling protein activity // Unknown	chr11:304260-305271 (+) // 94.68 // p15.5	---
1555759_a_at	CCL5	chemokine (C-C motif) ligand 5	AF043341	6352	187011	P13501	6874 // calcium ion homeostasis // Unknown /// 6887 // exocytosis // Unknown /// 6928 // cell motility // Unknown /// 6935 // chemotaxis // Unknown /// 6954 // inflammatory response // Unknown /// 6968 // cellular defense response // Unknown /// 6979 // response to oxidative stress // Unknown /// 7155 // cell adhesion // Unknown /// 7165 // signal transduction // Unknown /// 7267 // cell-cell sig…	5576 // extracellular region // Unknown	8009 // chemokine activity // Unknown	chr17:31223463-31231425 (-) // 100.0 // q12	---
210073_at	ST8SIA1	ST8 alpha-N-acetyl-neuraminide alpha-2,8-sialyltransferase 1	L32867	6489	601123	Q92185 /// Q6PZN5 /// Q86X71	5975 // carbohydrate metabolism // Unknown /// 6486 // protein amino acid glycosylation // Unknown /// 6688 // glycosphingolipid biosynthesis // Unknown	5794 // Golgi apparatus // Unknown /// 16021 // integral to membrane // Unknown	3828 // alpha-N-acetylneuraminate alpha-2,8-sialyltransferase activity // Unknown	chr12:22245240-22378500 (-) // 98.24 // p12.1	Blood group glycolipid biosynthesis-neolactoseries // KEGG /// Globoside metabolism // KEGG /// Ganglioside biosynthesis // KEGG
205466_s_at	HS3ST1	heparan sulfate (glucosamine) 3-O-sulfotransferase 1	NM_005114	9957	603244	O14792 /// Q6PEY8	---	5796 // Golgi lumen // Unknown /// 16021 // integral to membrane // Unknown	8146 // sulfotransferase activity // Unknown /// 16740 // transferase activity // Unknown	chr4:11076711-11078008 (-) // 99.39 // p15.33	Chondroitin / Heparan sulfate biosynthesis // KEGG
212681_at	EPB41L3	erythrocyte membrane protein band 4.1-like 3	AI770004	23136	605331	Q9Y2J2 /// Q8NFG9 /// Q96HL7	30866 // cortical actin cytoskeleton organization and biogenesis // Unknown	5737 // cytoplasm // Unknown /// 5856 // cytoskeleton // Unknown /// 5886 // plasma membrane // Unknown	3779 // actin binding // Unknown /// 5198 // structural molecule activity // Unknown /// 5488 // binding // Unknown	chr18:5382387-5533986 (-) // 97.1 // p11.31	---
1554723_x_at	---	---	BC007558	---	---	---	---	---	---	chr20:49152294-49642575 (-) // 58.75 // q13.13	---
236831_at	C3orf6	chromosome 3 open reading frame 6	AV683852	152137	---	Q86VH7 /// Q8IVM0	---	---	---	chr3:192593973-192594946 (+) // 91.27 // q28	---
240094_at	DJ971N18.2	Hypothetical protein DJ971N18.2	AL042660	56255	---	Q9H1E5	6118 // electron transport // Unknown	16021 // integral to membrane // Unknown	5489 // electron transporter activity // Unknown	chr20:7943669-7944283 (-) // 57.93 // p12.3	---
205893_at	NLGN1	neuroligin 1	NM_014932	22871	600568	Q8N2Q7	6605 // protein targeting // Unknown /// 7155 // cell adhesion // Unknown /// 7416 // synaptogenesis // Unknown /// 16080 // synaptic vesicle targeting // Unknown /// 16339 // calcium-dependent cell-cell adhesion // Unknown /// 45161 // ion channel clustering // Unknown /// 45664 // regulation of neuron differentiation // Unknown	5887 // integral to plasma membrane // Unknown /// 45202 // synapse // Unknown	3824 // catalytic activity // Unknown /// 16789 // carboxylic ester hydrolase activity // Unknown /// 42043 // neurexin binding // Unknown	chr3:174785178-175483615 (+) // 99.42 // q26.31	---
202053_s_at	ALDH3A2	aldehyde dehydrogenase 3 fam member A2	L47162	224	270200	P51648 /// Q68D64	6629 // lipid metabolism // Unknown /// 7417 // central nervous system development // Unknown /// 7422 // peripheral nervous system development // Unknown /// 8152 // metabolism // Unknown /// 8544 // epidermis development // Unknown	5783 // endoplasmic reticulum // Unknown /// 5792 // microsome // Unknown /// 16021 // integral to membrane // Unknown	4029 // aldehyde dehydrogenase (NAD) activity // Unknown /// 16491 // oxidoreductase activity // Unknown	chr17:19492718-19519647 (+) // 99.5 // p11.2	Glycolysis / Gluconeogenesis // KEGG /// Ascorbate and aldarate metabolism // KEGG /// Fatty acid metabolism // KEGG /// Bile acid biosynthesis // KEGG /// Valine, leucine and isoleucine degradation // KEGG /// Lysine degradation // KEGG /// Arginine and proline metabolism // KEGG /// Histidine metabolism // KEGG /// Tryptophan metabolism // KEGG /// beta-Alanine metabolism // KEGG /// Glycerolip…
222945_x_at	THEDC1	thioesterase domain containing 1	AI125696	55301	---	Q9NV23 /// Q9NUW1	6633 // fatty acid biosynthesis // Unknown /// 9058 // biosynthesis // Unknown	---	4320 // oleoyl-[acyl-carrier protein] hydrolase activity // Unknown /// 16788 // hydrolase activity, acting on ester bonds // Unknown	chr10:15125967-15155857 (+) // 72.51 // p13	---
208820_at	PTK2	PTK2 protein tyrosine kinase 2	AL037339	5747	600758	Q05397 /// Q658W2 /// Q8IYN9 /// Q8N638 /// Q8N9D7	6468 // protein amino acid phosphorylation // Unknown /// 7229 // integrin-mediated signaling pathway // Unknown	5856 // cytoskeleton // Unknown	4674 // protein serine/threonine kinase activity // Unknown /// 4713 // protein-tyrosine kinase activity // Unknown /// 5488 // binding // Unknown /// 5524 // ATP binding // Unknown /// 16740 // transferase activity // Unknown	chr8:141737682-142080485 (-) // 93.09 // q24.3	Integrin-mediated_cell_adhesion_KEGG // GenMAPP
221671_x_at	IGKC	immunoglobulin kappa constant	M63438	3514	147200	Q6GMV9 /// Q6GMX0 /// Q7Z3Y4 /// Q8NEK0 /// Q8TCD0 /// Q6GMW0 /// Q6GMW1 /// Q6GMX8 /// Q6GMX9 /// Q6P491 /// Q6P5R5 /// Q6P5S8 /// Q6PIH4 /// Q6PIH6 /// Q6PIH7 /// Q6PIL8 /// Q6PIT5 /// Q6PJF2 /// Q7Z473	6955 // immune response // Unknown	---	3823 // antigen binding // Unknown	chr2:89907191-89969668 (+) // 47.11 // p11.2 /// chr2:88995941-89281853 (-) // 91.64 // p11.2	---
201601_x_at	IFITM1	interferon induced transmembrane protein 1 (9-27)	NM_003641	8519	604456	P13164	74 // regulation of cell cycle // Unknown /// 6955 // immune response // Unknown /// 7166 // cell surface receptor linked signal transduction // Unknown /// 8285 // negative regulation of cell proliferation // Unknown /// 9607 // response to biotic stimulus // Unknown	5886 // plasma membrane // Unknown /// 16021 // integral to membrane // Unknown	5057 // receptor signaling protein activity // Unknown	chr11:304061-305272 (+) // 98.92 // p15.5	---
210306_at	L3MBTL	l(3)mbt-like (Drosophila)	U89358	26013	608802	Q9Y468 /// Q6ZWF5	6355 // regulation of transcription, DNA-dependent // Unknown /// 16568 // chromatin modification // Unknown	5634 // nucleus // Unknown	3700 // transcription factor activity // Unknown	chr20:41576487-41882584 (+) // 78.7 // q13.11	---
206914_at	CRTAM	class-I MHC-restricted T cell associated molecule	NM_019604	56253	---	O95727 /// Q6IRX2	---	---	---	chr11:122214464-122248555 (+) // 86.23 // q24.1	---
202086_at	MX1	myxovirus (influenza virus) resistance 1, interferon-inducible protein p78 (mouse) /// myxovirus (influenza virus) resistance 1, interferon-inducible protein p78 (mouse)	NM_002462	4599	147150	P20591 /// Q86YP5 /// Q8NAA8 /// Q96CI3	6917 // induction of apoptosis // Unknown /// 6955 // immune response // Unknown /// 7165 // signal transduction // Unknown	5737 // cytoplasm // Unknown	3924 // GTPase activity // Unknown /// 5525 // GTP binding // Unknown	---	---
230272_at	---	CDNA clone IMAGE:5260726, partial cds	AA464844	---	---	---	---	---	---	chr5:87996019-87996699 (-) // 97.84 // q14.3	---
219564_at	KCNJ16	potassium inwardly-rectifying channel, subfamily J, member 16	NM_018658	3773	605722	Q9NPI9 /// Q8N538	6811 // ion transport // Unknown /// 6813 // potassium ion transport // Unknown	16021 // integral to membrane // Unknown	5242 // inward rectifier potassium channel activity // Unknown /// 5244 // voltage-gated ion channel activity // Unknown /// 5267 // potassium channel activity // Unknown	chr17:65583020-65643339 (+) // 96.05 // q24.3	---
203186_s_at	S100A4	S100 calcium binding protein A4 (calcium protein, calvasculin, metastasin, murine placental homolog)	NM_002961	6275	114210	P26447	---	---	5509 // calcium ion binding // Unknown	chr1:150329170-150331355 (-) // 100.0 // q21.3	---
204439_at	IFI44L	interferon-induced protein 44-like	NM_006820	10964	---	Q86TE1 /// Q96B64 /// Q99984	---	---	---	chr1:78798169-78820090 (+) // 91.59 // p31.1	---
225331_at	C3orf6	chromosome 3 open reading frame 6	BF941088	152137	---	Q86VH7 /// Q8IVM0	---	---	---	chr3:192529575-192593476 (+) // 90.33 // q28	---
226702_at	LOC129607	hypothetical protein LOC129607	AI742057	129607	---	Q6ZRU2 /// Q96AL8	---	---	16301 // kinase activity // Unknown	chr2:6939044-6942236 (-) // 95.65 // p25.2	---
231929_at	---	MRNA; cDNA DKFZp586O0724 (from clone DKFZp586O0724)	AI458439	---	---	---	---	---	---	chr2:213689927-213692677 (-) // 94.34 // q34	---
204468_s_at	TIE1	tyrosine kinase with immunoglobulin-like and EGF-like domains 1	NM_005424	7075	600222	P35590 /// Q9HBS4	6468 // protein amino acid phosphorylation // Unknown /// 7165 // signal transduction // Unknown /// 7498 // mesoderm development // Unknown	5887 // integral to plasma membrane // Unknown	4714 // transmembrane receptor protein tyrosine kinase activity // Unknown /// 4872 // receptor activity // Unknown /// 5524 // ATP binding // Unknown /// 16740 // transferase activity // Unknown	chr1:43435800-43457871 (+) // 99.77 // p34.2	---
200965_s_at	ABLIM1	actin binding LIM protein 1	NM_006720	3983	602330	O14639	7010 // cytoskeleton organization and biogenesis // Unknown /// 7601 // visual perception // Unknown /// 9887 // organogenesis // Unknown	15629 // actin cytoskeleton // Unknown	3779 // actin binding // Unknown /// 8270 // zinc ion binding // Unknown	chr10:116180861-116276575 (-) // 99.05 // q25.3	---
224819_at	TCEAL8	transcription elongation factor A (SII)-like 8	AI743979	90843	---	Q8IYN2	---	---	3746 // translation elongation factor activity // Unknown	chrX:102314068-102316265 (-) // 57.7 // q22.1	---
235651_at	---	Transcribed locus, moderately similar to NP_055301.1 neuronal thread protein AD7c-NTP [Homo sapiens]	AV741130	---	---	---	---	---	---	chr1:54957405-54957955 (-) // 43.85 // p32.3	---
201005_at	CD9	CD9 antigen (p24)	NM_001769	928	143030	P21926	6928 // cell motility // Unknown /// 7155 // cell adhesion // Unknown /// 7342 // fusion of sperm to egg plasma membrane // Unknown /// 30168 // platelet activation // Unknown /// 30913 // paranodal junction formation // Unknown	5887 // integral to plasma membrane // Unknown	5515 // protein binding // Unknown	chr12:6179875-6217686 (+) // 93.88 // p13.31	---
224443_at	MGC14801	hypothetical protein MGC14801 /// hypothetical protein MGC14801	BC005997	84791	---	Q9BRT7	---	---	---	chr1:207944555-207994272 (+) // 90.94 // q32.3	---
227522_at	LOC134147	similar to mouse 2310016A09Rik gene	AA209487	134147	---	Q8TED6 /// Q96DG6	---	---	16787 // hydrolase activity // Unknown	chr5:10332389-10333017 (-) // 51.7 // p15.2	---
233500_x_at	CLEC2D	C-type lectin superfamily 2, member D	AF285089	29121	605659	Q8WUP7 /// Q9HD37 /// Q9HD38 /// Q9UHP7	7166 // cell surface receptor linked signal transduction // Unknown /// 19735 // antimicrobial humoral response (sensu Vertebrata) // Unknown	5624 // membrane fraction // Unknown /// 5887 // integral to plasma membrane // Unknown	4888 // transmembrane receptor activity // Unknown /// 5529 // sugar binding // Unknown	chr12:9724787-9738991 (+) // 76.42 // p13.31	---
207420_at	COLEC10	collectin sub-family member 10 (C-type lectin)	NM_006438	10584	607620	Q6UW19 /// Q9Y6Z7	6817 // phosphate transport // Unknown /// 6952 // defense response // Unknown /// 7157 // heterophilic cell adhesion // Unknown /// 9790 // embryonic development // Unknown	5634 // nucleus // Unknown /// 5829 // cytosol // Unknown	5529 // sugar binding // Unknown /// 5537 // mannose binding // Unknown	chr8:120148696-120188366 (+) // 99.62 // q24.12	---
212841_s_at	PPFIBP2	PTPRF interacting protein, binding protein 2 (liprin beta 2)	AI692180	8495	603142	Q8ND30 /// Q9UI67 /// Q68DV6	15074 // DNA integration // Unknown	---	3677 // DNA binding // Unknown /// 8907 // integrase activity // Unknown	chr11:7583547-7631563 (+) // 98.83 // p15.4	---
215076_s_at	COL3A1	collagen, type III, alpha 1 (Ehlers-Danlos syndrome type IV, autosomal dominant)	AU144167	1281	120180 /// 130020 /// 130050	P02461 /// P78429 /// Q8N6U4	6817 // phosphate transport // Unknown /// 8015 // circulation // Unknown /// 9887 // organogenesis // Unknown	5581 // collagen // Unknown /// 5586 // collagen type III // Unknown /// 5737 // cytoplasm // Unknown	5201 // extracellular matrix structural constituent // Unknown	chr2:189699849-189702031 (+) // 96.9 // q32.2	Inflammatory_Response_Pathway // GenMAPP
209498_at	CEACAM1	carcinoembryonic antigen-related cell adhesion molecule 1 (biliary glycoprotein)	X16354	634	109770	P13688 /// Q13854 /// Q13859 /// Q13860 /// Q5UB49 /// Q7KYP5 /// Q96CA7 /// Q16170	6955 // immune response // Unknown /// 7565 // pregnancy // Unknown	5624 // membrane fraction // Unknown /// 5887 // integral to plasma membrane // Unknown	---	chr19:47703297-47724474 (-) // 98.75 // q13.2	---
211828_s_at	TNIK	TRAF2 and NCK interacting kinase	AF172268	23043	---	Q9UKE5 /// Q7Z4L4 /// Q9Y6Z1	6445 // regulation of translation // Unknown /// 6468 // protein amino acid phosphorylation // Unknown /// 6950 // response to stress // Unknown /// 7243 // protein kinase cascade // Unknown	---	4674 // protein serine/threonine kinase activity // Unknown /// 5083 // small GTPase regulatory/interacting protein activity // Unknown /// 5524 // ATP binding // Unknown /// 16740 // transferase activity // Unknown	chr3:172264371-172660554 (-) // 97.18 // q26.2	---
243175_at	URP	urotensin II-related peptide	BF696056	257313	---	Q765I0	---	5576 // extracellular region // Unknown	5179 // hormone activity // Unknown	chr3:192468719-192482894 (-) // 83.82 // q28	---
228411_at	ALS2CR19	amyotrophic lateral sclerosis 2 (juvenile) chromosome region, candidate 19	BF109252	117583	---	Q8TEW8	910 // cytokinesis // Unknown /// 7049 // cell cycle // Unknown	5923 // tight junction // Unknown /// 16020 // membrane // Unknown	5515 // protein binding // Unknown	chr2:206309080-206310390 (+) // 97.75 // q33.3	---
1553645_at	FLJ39502	hypothetical protein FLJ39502	NM_173648	285025	---	Q6ZP82 /// Q8N8H3	---	---	---	chr2:179522810-179535976 (-) // 92.79 // q31.2	---
221766_s_at	FAM46A	family with sequence similarity 46, member A	AW246673	55603	---	Q8NFZ9 /// Q96IP4 /// Q9NXV5 /// Q9BW32	---	---	---	chr6:82512165-82519210 (-) // 94.13 // q14.1	---
1553432_s_at	OTOA	otoancorin	NM_170664	146183	607038 /// 607039	Q7RTW8	7605 // perception of sound // Unknown	5578 // extracellular matrix (sensu Metazoa) // Unknown	---	chr16:21623784-21679550 (+) // 97.04 // p12.2	---
219432_at	EVC	Ellis van Creveld syndrome	NM_014556	2121	193530 /// 225500 /// 604831	P57679 /// Q5U3C2	1501 // skeletal development // Unknown /// 7517 // muscle development // Unknown	16021 // integral to membrane // Unknown	---	chr4:5830995-5948844 (+) // 87.17 // p16.2	---
220132_s_at	CLEC2D	C-type lectin superfamily 2, member D	NM_013269	29121	605659	Q8WUP7 /// Q9HD37 /// Q9HD38 /// Q9UHP7	7166 // cell surface receptor linked signal transduction // Unknown /// 19735 // antimicrobial humoral response (sensu Vertebrata) // Unknown	5624 // membrane fraction // Unknown /// 5887 // integral to plasma membrane // Unknown	4888 // transmembrane receptor activity // Unknown /// 5529 // sugar binding // Unknown	chr12:9713591-9738991 (+) // 75.65 // p13.31	---
227623_at	---	MRNA; cDNA DKFZp313C0240 (from clone DKFZp313C0240)	H16409	---	---	---	---	---	---	chr7:81220411-81221697 (-) // 97.72 // q21.11	---
227353_at	EVER2	Epidermodysplasia verruciformis 2	BE671663	147138	226400 /// 605829	Q6ZUI6 /// Q8IU68 /// Q8IWU7 /// Q8N1J1 /// Q8N358 /// Q8NF04	---	16021 // integral to membrane // Unknown	---	chr17:73649912-73650644 (+) // 38.45 // q25.3	---
212014_x_at	CD44	CD44 antigen (homing function and Indian blood group system)	AI493245	960	107269	P16070 /// O95658 /// O95659 /// Q86T72 /// Q86UZ1 /// Q86Z27 /// Q99900 /// Q9UJ36 /// O95370 /// Q8N694	7155 // cell adhesion // Unknown /// 7160 // cell-matrix adhesion // Unknown /// 16337 // cell-cell adhesion // Unknown	5887 // integral to plasma membrane // Unknown /// 16020 // membrane // Unknown /// 16021 // integral to membrane // Unknown	4872 // receptor activity // Unknown /// 5515 // protein binding // Unknown /// 5518 // collagen binding // Unknown /// 5540 // hyaluronic acid binding // Unknown	chr11:35117303-35208819 (+) // 96.05 // p13	---
209829_at	C6orf32	chromosome 6 open reading frame 32	AB002384	9750	---	Q13529 /// Q9BQ28 /// Q9Y4F9	---	---	---	chr6:24912491-25019174 (-) // 91.06 // p22.2	---
221748_s_at	TNS	tensin /// tensin	AL046979	7145	600076	Q6PJM3 /// Q7Z2G4 /// Q7Z2S0 /// Q9H757 /// Q9NV48 /// Q9P1L6 /// Q9UFN8 /// Q6IPI5 /// Q86VB0	7242 // intracellular signaling cascade // Unknown	5856 // cytoskeleton // Unknown	3779 // actin binding // Unknown /// 4725 // protein tyrosine phosphatase activity // Unknown	---	Integrin-mediated_cell_adhesion_KEGG // GenMAPP
214464_at	CDC42BPA	CDC42 binding protein kinase alpha (DMPK-like)	NM_003607	8476	603412	Q86XX2 /// Q86XX3 /// Q8IWQ7 /// Q9H5K7 /// Q9NYF6 /// Q9P1F4 /// Q99646 /// Q5HYB0	6468 // protein amino acid phosphorylation // Unknown /// 7242 // intracellular signaling cascade // Unknown	16020 // membrane // Unknown	4674 // protein serine/threonine kinase activity // Unknown /// 4713 // protein-tyrosine kinase activity // Unknown /// 5083 // small GTPase regulatory/interacting protein activity // Unknown /// 5524 // ATP binding // Unknown	chr1:223614265-223812910 (-) // 96.01 // q42.13	---
221047_s_at	MARK1	MAP/microtubule affinity-regulating kinase 1	NM_018650	4139	606511	Q96SW9 /// Q9H051 /// Q9P0L2 /// Q9P251	6468 // protein amino acid phosphorylation // Unknown	15630 // microtubule cytoskeleton // Unknown	4674 // protein serine/threonine kinase activity // Unknown /// 4713 // protein-tyrosine kinase activity // Unknown /// 5524 // ATP binding // Unknown /// 16740 // transferase activity // Unknown	chr1:217090293-217224195 (+) // 98.01 // q41	---
227230_s_at	KIAA1211	KIAA1211 protein	BE855799	57482	---	Q6ZU35 /// Q9NTE2 /// Q9ULK9 /// Q9NTP8	---	---	---	chr4:57021687-57037702 (+) // 92.49 // q12	---
1557507_at	---	CDNA clone IMAGE:3910094, partial cds	BC016291	---	---	---	---	---	---	chr5:180620828-180631913 (+) // 75.21 // q35.3	---
242592_at	DKFZp762F0713	hypothetical protein DKFZp762F0713	AV727446	283554	---	Q6AWC7 /// Q86SM2 /// Q8N3F9	---	---	4872 // receptor activity // Unknown	chr14:52172164-52173198 (+) // 98.85 // q22.1	---
211712_s_at	ANXA9	annexin A9 /// annexin A9	BC005830	8416	603319	O76027 /// Q9HBJ6	7015 // actin filament organization // Unknown /// 16337 // cell-cell adhesion // Unknown	5892 // nicotinic acetylcholine-gated receptor-channel complex // Unknown /// 9986 // cell surface // Unknown	5509 // calcium ion binding // Unknown /// 5544 // calcium-dependent phospholipid binding // Unknown /// 15464 // acetylcholine receptor activity // Unknown /// 42803 // protein homodimerization activity // Unknown	chr1:147767915-147780249 (+) // 73.01 // q21.2	---
232843_s_at	DOCK8	dedicator of cytokinesis 8	AL161725	81704	---	Q8NF50 /// Q86XD0 /// Q5JPJ1	---	---	5085 // guanyl-nucleotide exchange factor activity // Unknown /// 5525 // GTP binding // Unknown /// 51020 // GTPase binding // Unknown	chr9:358017-459777 (+) // 97.67 // p24.3	---
226869_at	---	Full length insert cDNA clone ZD77F06	AI655611	---	---	---	---	---	---	chr1:3427662-3429268 (-) // 68.34 // p36.32	---
1568720_at	ZNF505	zinc finger protein 505	BC018100	81931	---	Q9H9X5	6355 // regulation of transcription, DNA-dependent // Unknown	5622 // intracellular // Unknown	3676 // nucleic acid binding // Unknown	chr19:19887087-20435653 (+) // 29.5 // p12	---
227839_at	MBD5	methyl-CpG binding domain protein 5	AI911379	55777	---	Q9P267	---	5634 // nucleus // Unknown	3677 // DNA binding // Unknown	chr2:149049769-149104768 (+) // 99.66 // q23.1	---
201288_at	ARHGDIB	Rho GDP dissociation inhibitor (GDI) beta	NM_001175	397	602843	P52566	6955 // immune response // Unknown /// 7162 // negative regulation of cell adhesion // Unknown /// 7266 // Rho protein signal transduction // Unknown /// 7275 // development // Unknown /// 30036 // actin cytoskeleton organization and biogenesis // Unknown	16023 // cytoplasmic vesicle // Unknown	5094 // Rho GDP-dissociation inhibitor activity // Unknown /// 5096 // GTPase activator activity // Unknown	chr12:14986231-15005870 (-) // 98.96 // p12.3	G13_Signaling_Pathway // GenMAPP
238063_at	FLJ32028	hypothetical protein FLJ32028	AA806283	201799	---	Q6P9G4 /// Q8WUT7 /// Q96MQ8	---	---	---	chr4:153904871-153905483 (-) // 97.6 // q31.3	---
1561969_at	LOC131368	hypothetical protein LOC131368	AY090780	131368	---	Q8TCW7 /// Q8WU36	---	---	---	chr3:103636548-103681375 (+) // 98.6 // q12.3	---
1559316_at	---	CDNA FLJ36043 fis, clone TESTI2017582	AK093362	---	---	---	---	---	---	chr5:20696577-20973557 (+) // 43.53 // p14.3 /// chr5:34300359-34431945 (-) // 40.71 // p13.3	---
205081_at	CRIP1	cysteine-rich protein 1 (intestinal)	NM_001311	1396	123875	P50238 /// Q8NAF8	8283 // cell proliferation // Unknown /// 19735 // antimicrobial humoral response (sensu Vertebrata) // Unknown	5737 // cytoplasm // Unknown	8270 // zinc ion binding // Unknown	chr14:105024641-105026072 (+) // 100.0 // q32.33	---
238206_at	LGR7	Leucine-rich repeat-containing G protein-coupled receptor 7	AI089319	59350	606654	Q9HBX9	7165 // signal transduction // Unknown /// 7186 // G-protein coupled receptor protein signaling pathway // Unknown	16021 // integral to membrane // Unknown	1584 // rhodopsin-like receptor activity // Unknown	chr4:159931684-159932124 (+) // 86.49 // q32.1	GPCRDB_Other // GenMAPP /// Smooth_muscle_contraction // GenMAPP
236634_at	---	---	AA496024	---	---	---	---	---	---	chr8:13469446-13470167 (+) // 72.91 // p22	---
206638_at	HTR2B	5-hydroxytryptamine (serotonin) receptor 2B	NM_000867	3357	601122	P41595 /// Q6P523 /// Q7Z580	7200 // G-protein signaling, coupled to IP3 second messenger (phospholipase C activating) // Unknown /// 8015 // circulation // Unknown /// 43123 // positive regulation of I-kappaB kinase/NF-kappaB cascade // Unknown	5887 // integral to plasma membrane // Unknown	1584 // rhodopsin-like receptor activity // Unknown /// 4871 // signal transducer activity // Unknown /// 4993 // serotonin receptor activity // Unknown	chr2:231798456-231814038 (-) // 99.39 // q37.1	GPCRDB_Class_A_Rhodopsin-like // GenMAPP /// Monoamine_GPCRs // GenMAPP
204072_s_at	13CDNA73	hypothetical protein CG003	NM_023037	10129	---	Q7Z3N2 /// Q8NB82 /// Q9Y3N6	---	---	5524 // ATP binding // Unknown	chr13:31503436-31768771 (+) // 99.6 // q13.1	---
205719_s_at	PAH	phenylalanine hydroxylase	NM_000277	5053	261600	P00439	6559 // L-phenylalanine catabolism // Unknown /// 8152 // metabolism // Unknown /// 8652 // amino acid biosynthesis // Unknown /// 9072 // aromatic amino acid family metabolism // Unknown	---	4497 // monooxygenase activity // Unknown /// 4505 // phenylalanine 4-monooxygenase activity // Unknown /// 5506 // iron ion binding // Unknown /// 16597 // amino acid binding // Unknown	chr12:101734570-101813848 (-) // 99.89 // q23.2	Biogenic_Amine_Synthesis // GenMAPP /// Phenylalanine, tyrosine and tryptophan biosynthesis // KEGG
220766_at	BTG4	B-cell translocation gene 4	NM_017589	54766	605673	Q9NY30 /// Q8NEH7	7050 // cell cycle arrest // Unknown /// 8285 // negative regulation of cell proliferation // Unknown /// 30182 // neuron cell differentiation // Unknown	---	---	chr11:110843467-110874716 (-) // 99.39 // q23.1	---
229635_at	---	CDNA clone IMAGE:4800262, partial cds	AW043859	---	---	---	---	---	---	chr4:79959576-79960043 (+) // 93.03 // q21.21	---
227810_at	ZNF558	zinc finger protein 558	AW119060	148156	---	Q96NG5	6355 // regulation of transcription, DNA-dependent // Unknown	5634 // nucleus // Unknown	3677 // DNA binding // Unknown /// 8270 // zinc ion binding // Unknown	chr19:8781385-8782407 (-) // 90.77 // p13.2	---
226909_at	KIAA1729	KIAA1729 protein	AW270138	85460	---	Q96LN8 /// Q9C0D4	---	5634 // nucleus // Unknown	3676 // nucleic acid binding // Unknown /// 8270 // zinc ion binding // Unknown	chr4:10117785-10124060 (-) // 94.93 // p16.1	---
205790_at	SCAP1	src family associated phosphoprotein 1	NM_003726	8631	604969	O15268 /// Q6ZP46 /// Q86WV1	6955 // immune response // Unknown /// 7165 // signal transduction // Unknown	---	4713 // protein-tyrosine kinase activity // Unknown /// 5070 // SH3/SH2 adaptor protein activity // Unknown /// 5515 // protein binding // Unknown	chr17:43565805-43862551 (-) // 97.51 // q21.32	---
221259_s_at	TEX11	testis expressed sequence 11 /// testis expressed sequence 11	NM_031276	56159	300311	Q8IYF3 /// Q96LZ4 /// Q96M47 /// Q9BXU6	---	---	5488 // binding // Unknown	chrX:69531811-69882982 (-) // 99.11 // q13.1	---
206544_x_at	SMARCA2	SWI/SNF related, matrix associated, actin dependent regulator of chromatin, subfamily a, member 2	NM_003070	6595	600014	P51531 /// Q8N9Q1 /// Q6NYH2	6355 // regulation of transcription, DNA-dependent // Unknown /// 6357 // regulation of transcription from Pol II promoter // Unknown /// 16568 // chromatin modification // Unknown	5634 // nucleus // Unknown /// 5654 // nucleoplasm // Unknown	3677 // DNA binding // Unknown /// 3713 // transcription coactivator activity // Unknown /// 4386 // helicase activity // Unknown /// 5524 // ATP binding // Unknown /// 16787 // hydrolase activity // Unknown	chr9:2019018-2182990 (+) // 89.21 // p24.3	---
225442_at	DDR2	Discoidin domain receptor family, member 2	AI799915	4921	191311	Q16832 /// Q6MZT2 /// Q7Z730	6468 // protein amino acid phosphorylation // Unknown /// 7155 // cell adhesion // Unknown /// 7165 // signal transduction // Unknown /// 7169 // transmembrane receptor protein tyrosine kinase signaling pathway // Unknown	5887 // integral to plasma membrane // Unknown	4714 // transmembrane receptor protein tyrosine kinase activity // Unknown /// 4872 // receptor activity // Unknown /// 5524 // ATP binding // Unknown /// 16740 // transferase activity // Unknown	chr1:159486218-159488197 (+) // 89.16 // q23.3 /// chr10:38679373-38681352 (+) // 86.06 // p11.21	---
58780_s_at	FLJ10357	hypothetical protein FLJ10357	R42449	55701	---	Q86TR4 /// Q8TER5 /// Q9BWP5 /// Q9H7L6 /// Q9NTF9 /// Q9NW24	---	---	---	chr14:20627176-20627543 (+) // 78.84 // q11.2	---
1553055_a_at	MGC19764	hypothetical protein MGC19764	NM_144975	162394	---	Q8WU54 /// Q96A82	---	---	---	chr17:30594220-30610951 (+) // 97.07 // q12	---
219355_at	FLJ10178	hypothetical protein FLJ10178	NM_018015	55086	---	Q6NSI4 /// Q6PHY5 /// Q6PII9 /// Q6PJU8 /// Q9H7W5 /// Q9NWA6	---	---	3676 // nucleic acid binding // Unknown	chrX:105662031-105728812 (+) // 99.93 // q22.3	---
230383_x_at	---	Transcribed locus	AA133285	---	---	---	---	---	---	chr17:30624362-30624784 (+) // 97.91 // q12	---
220146_at	TLR7	toll-like receptor 7	NM_016562	51284	300365	Q9NYK1	6954 // inflammatory response // Unknown	16021 // integral to membrane // Unknown	4888 // transmembrane receptor activity // Unknown	chrX:12644862-12668156 (+) // 93.85 // p22.2	---
1556499_s_at	COL1A1	collagen, type I, alpha 1	BE221212	1277	120150 /// 130000 /// 130060 /// 166200 /// 166210 /// 166220 /// 166710 /// 259420	P02452 /// Q8N473	1501 // skeletal development // Unknown /// 6817 // phosphate transport // Unknown /// 7605 // perception of sound // Unknown /// 8544 // epidermis development // Unknown	5581 // collagen // Unknown /// 5584 // collagen type I // Unknown /// 5737 // cytoplasm // Unknown	5201 // extracellular matrix structural constituent // Unknown /// 8147 // structural constituent of bone // Unknown	chr17:45617636-45617829 (-) // 57.1 // q21.33	Inflammatory_Response_Pathway // GenMAPP
238458_at	EFHA2	EF hand domain family, member A2	AI868167	286097	---	Q8IYZ3 /// Q86XE3	---	---	5509 // calcium ion binding // Unknown	chr8:17023322-17024516 (+) // 95.27 // p22	---
204694_at	AFP	alpha-fetoprotein	NM_001134	174	104150	P02771	6810 // transport // Unknown /// 6955 // immune response // Unknown	5615 // extracellular space // Unknown	5386 // carrier activity // Unknown /// 16151 // nickel ion binding // Unknown	chr4:74666967-74686527 (+) // 98.18 // q13.3	---
1555812_a_at	ARHGDIB	Rho GDP dissociation inhibitor (GDI) beta	AF498927	397	602843	P52566	6955 // immune response // Unknown /// 7162 // negative regulation of cell adhesion // Unknown /// 7266 // Rho protein signal transduction // Unknown /// 7275 // development // Unknown /// 30036 // actin cytoskeleton organization and biogenesis // Unknown	16023 // cytoplasmic vesicle // Unknown	5094 // Rho GDP-dissociation inhibitor activity // Unknown /// 5096 // GTPase activator activity // Unknown	chr12:14986569-14994925 (-) // 97.15 // p12.3	G13_Signaling_Pathway // GenMAPP
202054_s_at	ALDH3A2	aldehyde dehydrogenase 3 family, member A2	NM_000382	224	270200	P51648 /// Q68D64	6629 // lipid metabolism // Unknown /// 7417 // central nervous system development // Unknown /// 7422 // peripheral nervous system development // Unknown /// 8152 // metabolism // Unknown /// 8544 // epidermis development // Unknown	5783 // endoplasmic reticulum // Unknown /// 5792 // microsome // Unknown /// 16021 // integral to membrane // Unknown	4029 // aldehyde dehydrogenase (NAD) activity // Unknown /// 16491 // oxidoreductase activity // Unknown	chr17:19492682-19521495 (+) // 91.4 // p11.2	Glycolysis / Gluconeogenesis // KEGG /// Ascorbate and aldarate metabolism // KEGG /// Fatty acid metabolism // KEGG /// Bile acid biosynthesis // KEGG /// Valine, leucine and isoleucine degradation // KEGG /// Lysine degradation // KEGG /// Arginine and proline metabolism // KEGG /// Histidine metabolism // KEGG /// Tryptophan metabolism // KEGG /// beta-Alanine metabolism // KEGG /// Glycerolip…
1559050_at	HCG27	HLA complex group 27	BC041465	253018	---	Q5U5P9 /// Q8N820	---	---	---	chr6:31273296-31279703 (+) // 69.24 // p21.33	---
209835_x_at	CD44	CD44 antigen (homing function and Indian blood group system)	BC004372	960	107269	P16070 /// O95658 /// O95659 /// Q86T72 /// Q86UZ1 /// Q86Z27 /// Q99900 /// Q9UJ36 /// O95370 /// Q8N694	7155 // cell adhesion // Unknown /// 7160 // cell-matrix adhesion // Unknown /// 16337 // cell-cell adhesion // Unknown	5887 // integral to plasma membrane // Unknown /// 16020 // membrane // Unknown /// 16021 // integral to membrane // Unknown	4872 // receptor activity // Unknown /// 5515 // protein binding // Unknown /// 5518 // collagen binding // Unknown /// 5540 // hyaluronic acid binding // Unknown	chr11:35117304-35207591 (+) // 98.62 // p13	---
202859_x_at	IL8	interleukin 8	NM_000584	3576	146930	P10145 /// Q6LAE6	1525 // angiogenesis // Unknown /// 6928 // cell motility // Unknown /// 6935 // chemotaxis // Unknown /// 7050 // cell cycle arrest // Unknown /// 7186 // G-protein coupled receptor protein signaling pathway // Unknown /// 7242 // intracellular signaling cascade // Unknown /// 7267 // cell-cell signaling // Unknown /// 8285 // negative regulation of cell proliferation // Unknown /// 19722 // cal…	5615 // extracellular space // Unknown /// 5625 // soluble fraction // Unknown	5153 // interleukin-8 receptor binding // Unknown /// 5515 // protein binding // Unknown /// 8009 // chemokine activity // Unknown	chr4:74971336-74974466 (+) // 71.69 // q13.3	---
204882_at	---	---	NM_014882	---	---	---	---	---	---	chr2:68913770-68965606 (+) // 99.93 // p13.3	---
244125_at	MGC70870	Hypothetical LOC403340	AA837131	403340	---	Q6P3W3 /// Q8NAS8	6564 // L-serine biosynthesis // Unknown	---	16491 // oxidoreductase activity // Unknown /// 16616 // oxidoreductase activity, acting on the CH-OH group of donors, NAD or NADP as acceptor // Unknown	chr17_random:2327310-2327962 (+) // 17.0 //	---
235683_at	SESN3	sestrin 3	BF685808	143686	607768	P58005	7050 // cell cycle arrest // Unknown	5634 // nucleus // Unknown	---	chr11:94545512-94558221 (-) // 99.58 // q21	---
230818_at	---	Transcribed locus, weakly similar to XP_509311.1 similar to MGC4170 protein [Pan troglodytes]	AI360054	---	---	---	---	---	---	chr2:96959979-96960974 (+) // 75.8 // q11.2	---
222592_s_at	ACSL5	acyl-CoA synthetase long-chain family member 5	AW173691	51703	605677	Q9ULC5 /// Q6UX44	6631 // fatty acid metabolism // Unknown /// 8152 // metabolism // Unknown	---	287 // magnesium ion binding // Unknown /// 4467 // long-chain-fatty-acid-CoA ligase activity // Unknown /// 16874 // ligase activity // Unknown	chr10:114125665-114178127 (+) // 99.21 // q25.2	Fatty_Acid_Degradation // GenMAPP /// Fatty acid metabolism // KEGG
203836_s_at	MAP3K5	mitogen-activated protein kinase kinase kinase 5	D84476	4217	602448	Q99683	165 // MAPKKK cascade // Unknown /// 6468 // protein amino acid phosphorylation // Unknown /// 6915 // apoptosis // Unknown /// 6950 // response to stress // Unknown /// 7257 // activation of JNK // Unknown /// 8624 // induction of apoptosis by extracellular signals // Unknown	---	287 // magnesium ion binding // Unknown /// 4674 // protein serine/threonine kinase activity // Unknown /// 4709 // MAP kinase kinase kinase activity // Unknown /// 5524 // ATP binding // Unknown /// 16740 // transferase activity // Unknown	chr6:136920458-137155257 (-) // 99.14 // q23.3	---
234525_at	---	---	AL137340	---	---	---	---	---	---	chr11:83772786-83777209 (+) // 82.46 // q14.1	---
240246_at	---	CDNA FLJ44826 fis, clone BRACE3046762	AW294722	---	---	---	---	---	---	chr4:191270714-191271300 (+) // 79.97 // q35.2 /// chr20:28252267-28255446 (+) // 69.52 // q11.1	---
233126_s_at	THEDC1	thioesterase domain containing 1	AK001844	55301	---	Q9NV23 /// Q9NUW1	6633 // fatty acid biosynthesis // Unknown /// 9058 // biosynthesis // Unknown	---	4320 // oleoyl-[acyl-carrier protein] hydrolase activity // Unknown /// 16788 // hydrolase activity, acting on ester bonds // Unknown	chr10:15129127-15155664 (+) // 76.63 // p13	---
231993_at	---	CDNA: FLJ23131 fis, clone LNG08502	AK026784	---	---	---	---	---	---	chr13:101169307-101171207 (+) // 92.08 // q33.1	---
202935_s_at	SOX9	SRY (sex determining region Y)-box 9 (campomelic dysplasia, autosomal sex-reversal)	AI382146	6662	114290 /// 608160	P48436	1501 // skeletal development // Unknown /// 1502 // cartilage condensation // Unknown /// 6357 // regulation of transcription from Pol II promoter // Unknown	5634 // nucleus // Unknown	3677 // DNA binding // Unknown /// 3704 // specific RNA polymerase II transcription factor activity // Unknown	chr17:67628755-67634152 (+) // 87.33 // q24.3	---
211506_s_at	IL8	interleukin 8	AF043337	3576	146930	P10145 /// Q6LAE6	1525 // angiogenesis // Unknown /// 6928 // cell motility // Unknown /// 6935 // chemotaxis // Unknown /// 7050 // cell cycle arrest // Unknown /// 7186 // G-protein coupled receptor protein signaling pathway // Unknown /// 7242 // intracellular signaling cascade // Unknown /// 7267 // cell-cell signaling // Unknown /// 8285 // negative regulation of cell proliferation // Unknown /// 19722 // cal…	5615 // extracellular space // Unknown /// 5625 // soluble fraction // Unknown	5153 // interleukin-8 receptor binding // Unknown /// 5515 // protein binding // Unknown /// 8009 // chemokine activity // Unknown	chr4:74971403-74972773 (+) // 76.92 // q13.3	---
215321_at	RPIB9	Rap2-binding protein 9	AI825798	154661	---	Q8IWW5 /// Q8NB55 /// Q8TBG7 /// Q96NL0	---	---	---	chr7:87015481-87104405 (+) // 99.02 // q21.12	---
206120_at	CD33	CD33 antigen (gp67)	NM_001772	945	159590	P20138 /// Q8NF11	7155 // cell adhesion // Unknown /// 7165 // signal transduction // Unknown /// 7267 // cell-cell signaling // Unknown /// 8285 // negative regulation of cell proliferation // Unknown	5887 // integral to plasma membrane // Unknown	4872 // receptor activity // Unknown /// 5515 // protein binding // Unknown /// 5529 // sugar binding // Unknown	chr19:56420174-56435084 (+) // 86.78 // q13.41	---
221728_x_at	---	---	AA628440	---	---	---	---	---	---	chrX:72823511-72844569 (-) // 93.88 // q13.2	---
228855_at	LOC440388	similar to coenzyme A diphosphatase	AI927964	440388	---	---	---	---	---	chr16:76333102-76333655 (+) // 90.05 // q23.1	---
221666_s_at	PYCARD	PYD and CARD domain containing	BC004470	29108	606838	Q9ULZ3	6917 // induction of apoptosis // Unknown /// 6919 // caspase activation // Unknown /// 7165 // signal transduction // Unknown /// 42981 // regulation of apoptosis // Unknown /// 45786 // negative regulation of cell cycle // Unknown	5737 // cytoplasm // Unknown	5515 // protein binding // Unknown /// 8656 // caspase activator activity // Unknown	chr16:31120309-31121752 (-) // 97.01 // p11.2	---
1569675_at	---	Homo sapiens, clone IMAGE:4694422, mRNA	BC022056	---	---	---	---	---	---	chr11:110760671-110810979 (-) // 43.53 // q23.1	---
213425_at	WNT5A	wingless-type MMTV integration site family, member 5A /// wingless-type MMTV integration site family, member 5A	AI968085	7474	164975	Q6DK41 /// Q6P278	7165 // signal transduction // Unknown /// 7223 // frizzled-2 signaling pathway // Unknown /// 7267 // cell-cell signaling // Unknown /// 9653 // morphogenesis // Unknown	5615 // extracellular space // Unknown /// 5625 // soluble fraction // Unknown	5102 // receptor binding // Unknown	---	---
210916_s_at	CD44	CD44 antigen (homing function and Indian blood group system)	AF098641	960	107269	P16070 /// O95658 /// O95659 /// Q86T72 /// Q86UZ1 /// Q86Z27 /// Q99900 /// Q9UJ36 /// O95370 /// Q8N694	7155 // cell adhesion // Unknown /// 7160 // cell-matrix adhesion // Unknown /// 16337 // cell-cell adhesion // Unknown	5887 // integral to plasma membrane // Unknown /// 16020 // membrane // Unknown /// 16021 // integral to membrane // Unknown	4872 // receptor activity // Unknown /// 5515 // protein binding // Unknown /// 5518 // collagen binding // Unknown /// 5540 // hyaluronic acid binding // Unknown	chr11:35117408-35207456 (+) // 100.0 // p13	---
222939_s_at	SLC16A10	solute carrier family 16 (monocarboxylic acid transporters), member 10	N30257	117247	607550	Q6ZMG0 /// Q8WVI5 /// Q8TF71	6810 // transport // Unknown	16021 // integral to membrane // Unknown	5215 // transporter activity // Unknown	chr6:111621187-111651850 (+) // 92.12 // q21	---
222108_at	AMIGO2	amphoterin induced gene 2	AC004010	347902	---	Q7Z4A0 /// Q86SJ2 /// Q96CN8	---	16021 // integral to membrane // Unknown	---	chr12:45756522-45759052 (-) // 95.36 // q13.11	---
241703_at	RPIB9	Rap2-binding protein 9	AI928037	154661	---	Q8IWW5 /// Q8NB55 /// Q8TBG7 /// Q96NL0	---	---	---	chr7:87105811-87106262 (+) // 98.47 // q21.12	---
234428_at	---	---	AL110127	---	---	---	---	---	---	---	---
243856_at	---	Transcribed locus, strongly similar to XP_528935.1 similar to McLeod syndrome-associated, Kell blood group protein; membrane transport protein [Pan troglodytes]	AW450206	---	---	---	---	---	---	chrX:37299480-37299908 (+) // 99.3 // p21.1	---
219211_at	USP18	ubiquitin specific protease 18	NM_017414	11274	607057	Q9UMW8 /// Q6IAD9	6511 // ubiquitin-dependent protein catabolism // Unknown /// 6512 // ubiquitin cycle // Unknown	5634 // nucleus // Unknown	4197 // cysteine-type endopeptidase activity // Unknown /// 4221 // ubiquitin thiolesterase activity // Unknown /// 16787 // hydrolase activity // Unknown	chr22:17007485-17034712 (+) // 92.46 // q11.21 /// chr22:18725650-19056096 (-) // 78.85 // q11.21	---
223590_at	DKFZp434I1610	hypothetical protein DKFZp434I1610	AL136732	90592	---	Q6ZW67 /// Q9H0M5	6355 // regulation of transcription, DNA-dependent // Unknown	5634 // nucleus // Unknown	3676 // nucleic acid binding // Unknown /// 8270 // zinc ion binding // Unknown	chr19:11918994-11922577 (+) // 92.79 // p13.2	---
231997_at	MGC10233	catastrophin	R69910	219899	---	---	6464 // protein modification // Unknown	---	---	chr11:120400039-120464509 (+) // 98.91 // q23.3	---
207978_s_at	NR4A3	nuclear receptor subfamily 4, group A, member 3	NM_006981	8013	600542	Q92570 /// Q6AW80	6355 // regulation of transcription, DNA-dependent // Unknown	5634 // nucleus // Unknown	3700 // transcription factor activity // Unknown /// 3707 // steroid hormone receptor activity // Unknown /// 4887 // thyroid hormone receptor activity // Unknown /// 5488 // binding // Unknown	chr9:99663691-99706888 (+) // 95.45 // q31.1	Hypertrophy_model // GenMAPP
209949_at	NCF2	neutrophil cytosolic factor 2 (65kDa, chronic granulomatous disease, autosomal 2)	BC001606	4688	233710	P19878	6801 // superoxide metabolism // Unknown /// 6968 // cellular defense response // Unknown	5625 // soluble fraction // Unknown /// 5829 // cytosol // Unknown	5488 // binding // Unknown /// 5489 // electron transporter activity // Unknown	chr1:180256528-180291373 (-) // 90.59 // q25.3	---
220001_at	PADI4	peptidyl arginine deiminase, type IV	NM_012387	23569	180300 /// 605347	Q9UM07 /// Q9NRE8	6464 // protein modification // Unknown	---	4668 // protein-arginine deiminase activity // Unknown /// 5509 // calcium ion binding // Unknown /// 16787 // hydrolase activity // Unknown	chr1:17379997-17435801 (+) // 99.78 // p36.13	---
212063_at	CD44	CD44 antigen (homing function and Indian blood group system)	BE903880	960	107269	P16070 /// O95658 /// O95659 /// Q86T72 /// Q86UZ1 /// Q86Z27 /// Q99900 /// Q9UJ36 /// O95370 /// Q8N694	7155 // cell adhesion // Unknown /// 7160 // cell-matrix adhesion // Unknown /// 16337 // cell-cell adhesion // Unknown	5887 // integral to plasma membrane // Unknown /// 16020 // membrane // Unknown /// 16021 // integral to membrane // Unknown	4872 // receptor activity // Unknown /// 5515 // protein binding // Unknown /// 5518 // collagen binding // Unknown /// 5540 // hyaluronic acid binding // Unknown	chr11:35208209-35210525 (+) // 92.0 // p13	---
243764_at	VSIG1	V-set and immunoglobulin domain containing 1	AW085312	340547	---	Q6MZS4 /// Q86XK7	---	16020 // membrane // Unknown	---	chrX:107127870-107128561 (+) // 70.39 // q22.3	---
235494_at	---	Homo sapiens, clone IMAGE:5284125, mRNA	AA702209	---	---	---	---	---	---	chr3:117003906-117004603 (-) // 84.81 // q13.31	---
225502_at	DOCK8	dedicator of cytokinesis 8	AL161725	81704	---	Q8NF50 /// Q86XD0 /// Q5JPJ1	---	---	5085 // guanyl-nucleotide exchange factor activity // Unknown /// 5525 // GTP binding // Unknown /// 51020 // GTPase binding // Unknown	chr9:358017-455252 (+) // 98.73 // p24.3	---
231093_at	FCRH3	Fc receptor-like protein 3	BF514552	115352	606510	Q96LA4 /// Q96P27 /// Q96P28 /// Q8N6S2 /// Q96P29 /// Q96P30 /// Q96P31	---	---	4872 // receptor activity // Unknown	chr1:154459345-154459855 (-) // 92.73 // q23.1	---
207850_at	CXCL3	chemokine (C-X-C motif) ligand 3	NM_002090	2921	139111	P19876	6935 // chemotaxis // Unknown /// 6954 // inflammatory response // Unknown /// 7186 // G-protein coupled receptor protein signaling pathway // Unknown	5615 // extracellular space // Unknown	8009 // chemokine activity // Unknown	chr4:75267348-75269440 (-) // 91.26 // q13.3	---
203088_at	FBLN5	fibulin 5	NM_006329	10516	123700 /// 219100 /// 604580 /// 608895	Q9UBX5 /// Q6UWA3 /// Q86TV4	7160 // cell-matrix adhesion // Unknown /// 7596 // blood coagulation // Unknown	5578 // extracellular matrix (sensu Metazoa) // Unknown /// 5625 // soluble fraction // Unknown /// 16020 // membrane // Unknown	4888 // transmembrane receptor activity // Unknown /// 5178 // integrin binding // Unknown /// 5509 // calcium ion binding // Unknown /// 5515 // protein binding // Unknown	chr14:91405820-91483494 (-) // 97.77 // q32.12	---
218839_at	HEY1	hairy/enhancer-of-split related with YRPW motif 1	NM_012258	23462	602953	Q9Y5J3 /// Q8NAM2 /// Q96PR6	6355 // regulation of transcription, DNA-dependent // Unknown /// 7399 // neurogenesis // Unknown	5634 // nucleus // Unknown	3677 // DNA binding // Unknown /// 3700 // transcription factor activity // Unknown	chr8:80838819-80842477 (-) // 99.71 // q21.13	---
240174_at	---	Hypothetical LOC388903	BF512871	388903	---	---	---	---	---	chr22:38773106-38773983 (+) // 46.44 // q13.1	---
213317_at	CLIC5	Chloride intracellular channel 5	AL049313	53405	607293	Q9NZA1 /// Q7Z2R8 /// Q8N675 /// Q8NBY3	6811 // ion transport // Unknown /// 6821 // chloride transport // Unknown /// 7565 // pregnancy // Unknown	5626 // insoluble fraction // Unknown /// 5794 // Golgi apparatus // Unknown /// 15629 // actin cytoskeleton // Unknown /// 16020 // membrane // Unknown	5247 // voltage-gated chloride channel activity // Unknown /// 15108 // chloride transporter activity // Unknown	chr6:45974171-45976359 (-) // 96.52 // p21.1	---
206589_at	GFI1	growth factor independent 1	NM_005263	2672	600871	Q99684	83 // G1/S-specific transcription in mitotic cell cycle // Unknown /// 6355 // regulation of transcription, DNA-dependent // Unknown /// 16032 // viral life cycle // Unknown	5634 // nucleus // Unknown	3677 // DNA binding // Unknown /// 3702 // RNA polymerase II transcription factor activity // Unknown /// 8270 // zinc ion binding // Unknown	chr1:92652342-92664451 (-) // 92.24 // p22.1	---
226189_at	---	Homo sapiens, clone IMAGE:4794726, mRNA	BF513121	---	---	---	---	---	---	chr7:20226675-20228622 (+) // 80.16 // p21.1	---
227702_at	CYP4X1	cytochrome P450, family 4, subfamily X, polypeptide 1	AA557324	260293	---	Q8N118 /// Q6ZN67 /// Q8NAZ3	6118 // electron transport // Unknown	5783 // endoplasmic reticulum // Unknown /// 5792 // microsome // Unknown /// 16020 // membrane // Unknown	4497 // monooxygenase activity // Unknown /// 50381 // unspecific monooxygenase activity // Unknown	chr1:47227882-47228442 (+) // 91.36 // p33	---
209120_at	NR2F2	nuclear receptor subfamily 2, group F, member 2	AL037401	7026	107773	P24468	6357 // regulation of transcription from Pol II promoter // Unknown /// 6629 // lipid metabolism // Unknown /// 7165 // signal transduction // Unknown	5634 // nucleus // Unknown	3700 // transcription factor activity // Unknown /// 3706 // ligand-regulated transcription factor activity // Unknown /// 3707 // steroid hormone receptor activity // Unknown /// 3714 // transcription corepressor activity // Unknown	chr15:94675757-94683136 (+) // 89.93 // q26.2	Nuclear_Receptors // GenMAPP
207182_at	GABRA6	gamma-aminobutyric acid (GABA) A receptor, alpha 6	NM_000811	2559	137143	Q16445	6811 // ion transport // Unknown /// 6821 // chloride transport // Unknown /// 7165 // signal transduction // Unknown /// 7214 // gamma-aminobutyric acid signaling pathway // Unknown /// 7268 // synaptic transmission // Unknown	5887 // integral to plasma membrane // Unknown /// 45211 // postsynaptic membrane // Unknown	4890 // GABA-A receptor activity // Unknown /// 5216 // ion channel activity // Unknown /// 5230 // extracellular ligand-gated ion channel activity // Unknown /// 8503 // benzodiazepine receptor activity // Unknown	chr5:161045547-161061690 (+) // 98.61 // q34	---
217625_x_at	---	Hypothetical gene supported by AK024177	AA102667	441468	---	---	---	---	---	chr14:74280760-74281064 (+) // 2.1 // q24.3 /// chr9:129348335-129348776 (+) // 16.77 // q34.11	---
243380_at	SLC4A5	Solute carrier family 4, sodium bicarbonate cotransporter, member 5	AI703164	57835	606757	Q8WXD3 /// Q8WXD7 /// Q96DS8 /// Q9BY07	6820 // anion transport // Unknown /// 15701 // bicarbonate transport // Unknown	16020 // membrane // Unknown /// 16021 // integral to membrane // Unknown	5452 // inorganic anion exchanger activity // Unknown /// 8510 // sodium:bicarbonate symporter activity // Unknown	chr2:74362447-74362846 (-) // 91.48 // p13.1	---
237149_at	---	---	AW451086	---	---	---	---	---	---	chr9:106558025-106558619 (-) // 44.94 // q31.2	---
225974_at	DKFZp762C1112	hypothetical protein DKFZp762C1112	BF732480	169200	---	Q6YI46 /// Q8N3G6	---	---	---	chr8:91703403-91706592 (-) // 98.01 // q21.3	---
219911_s_at	SLCO4A1	solute carrier organic anion transporter family, member 4A1	NM_016354	28231	---	Q96BD0 /// Q8TB00	6811 // ion transport // Unknown	16021 // integral to membrane // Unknown	5215 // transporter activity // Unknown	chr20:60758160-60774090 (+) // 99.96 // q13.33	---
232265_at	ATXN7L1	ataxin 7-like 1	BC003517	57485	---	Q9ULK2 /// Q8N2T0 /// Q8N7W9 /// Q9BTQ8	---	---	---	chr7:104847873-104858664 (-) // 88.62 // q22.3	---
237075_at	---	---	AI191591	---	---	---	---	---	---	chr2:114304989-114317163 (-) // 89.91 // q14.1	---
204472_at	GEM	GTP binding protein overexpressed in skeletal muscle	NM_005261	2669	600164	P55040	6955 // immune response // Unknown /// 7166 // cell surface receptor linked signal transduction // Unknown /// 7264 // small GTPase mediated signal transduction // Unknown	16020 // membrane // Unknown	5516 // calmodulin binding // Unknown /// 5525 // GTP binding // Unknown	chr8:95330661-95343697 (-) // 99.72 // q22.1	---
209959_at	NR4A3	nuclear receptor subfamily 4, group A, member 3	U12767	8013	600542	Q92570 /// Q6AW80	6355 // regulation of transcription, DNA-dependent // Unknown	5634 // nucleus // Unknown	3700 // transcription factor activity // Unknown /// 3707 // steroid hormone receptor activity // Unknown /// 4887 // thyroid hormone receptor activity // Unknown /// 5488 // binding // Unknown	chr9:99668563-99708728 (+) // 92.28 // q31.1	Hypertrophy_model // GenMAPP
212442_s_at	LASS6	LAG1 longevity assurance homolog 6 (S. cerevisiae)	BG289001	253782	---	Q6ZMG9	6355 // regulation of transcription, DNA-dependent // Unknown /// 8610 // lipid biosynthesis // Unknown	5634 // nucleus // Unknown /// 16021 // integral to membrane // Unknown	3700 // transcription factor activity // Unknown	chr2:169453816-169457368 (+) // 97.62 // q24.3	---
201852_x_at	COL3A1	collagen, type III, alpha 1 (Ehlers-Danlos syndrome type IV, autosomal dominant)	AI813758	1281	120180 /// 130020 /// 130050	P02461 /// P78429 /// Q8N6U4	6817 // phosphate transport // Unknown /// 8015 // circulation // Unknown /// 9887 // organogenesis // Unknown	5581 // collagen // Unknown /// 5586 // collagen type III // Unknown /// 5737 // cytoplasm // Unknown	5201 // extracellular matrix structural constituent // Unknown	chr2:189664615-189702975 (+) // 99.18 // q32.2	Inflammatory_Response_Pathway // GenMAPP
208690_s_at	PDLIM1	PDZ and LIM domain 1 (elfin)	BC000915	9124	605900	O00151	6979 // response to oxidative stress // Unknown	5856 // cytoskeleton // Unknown	5515 // protein binding // Unknown /// 8270 // zinc ion binding // Unknown	chr10:96987321-97040771 (-) // 97.88 // q23.33	---
220260_at	TBC1D19	TBC1 domain family, member 19	NM_018317	55296	---	Q8N5T2 /// Q9NUX1	---	---	---	chr4:26261974-26433071 (+) // 99.9 // p15.2	---
1558692_at	MGC31963	Kidney predominant protein NCU-G1	AW090182	112770	---	Q6UX96 /// Q8IV07 /// Q96F65 /// Q8WWB7	---	---	---	chr1:153072955-153075935 (-) // 54.74 // q22	---
204748_at	PTGS2	prostaglandin-endoperoxide synthase 2 (prostaglandin G/H synthase and cyclooxygenase)	NM_000963	5743	600262	P35354 /// Q6ZYK7 /// Q8IZA9	6928 // cell motility // Unknown /// 7582 // physiological process // Unknown /// 8217 // regulation of blood pressure // Unknown /// 19371 // cyclooxygenase pathway // Unknown /// 30216 // keratinocyte differentiation // Unknown /// 50727 // regulation of inflammatory response // Unknown	5634 // nucleus // Unknown /// 5737 // cytoplasm // Unknown /// 16020 // membrane // Unknown	4601 // peroxidase activity // Unknown /// 4666 // prostaglandin-endoperoxide synthase activity // Unknown /// 16491 // oxidoreductase activity // Unknown /// 16702 // oxidoreductase activity, acting on single donors with incorporation of molecular oxygen, incorporation of two atoms of oxygen // Unknown	chr1:183372625-183381213 (-) // 97.42 // q31.1	Eicosanoid_Synthesis // GenMAPP /// Prostaglandin_synthesis_regulation // GenMAPP /// Prostaglandin and leukotriene metabolism // KEGG
1562938_at	LOC150763	Hypothetical protein LOC150763	BC015216	150763	---	Q6NUI2 /// Q6P2E4 /// Q6ZNI3 /// Q6ZNI5 /// Q6ZWJ4 /// Q86YV7 /// Q96BS6	8152 // metabolism // Unknown /// 8654 // phospholipid biosynthesis // Unknown	---	8415 // acyltransferase activity // Unknown /// 16740 // transferase activity // Unknown	chr2:96098239-96099562 (+) // 55.33 // q11.2 /// chr2:97181103-97182426 (-) // 55.48 // q11.2	---
217627_at	ZNF573	zinc finger protein 573	BE515346	126231	---	Q6P1P1 /// Q6PIT4 /// Q7Z7Q3 /// Q86YE8 /// Q8N2Q1 /// Q96BM3 /// Q96NH0	6355 // regulation of transcription, DNA-dependent // Unknown	5634 // nucleus // Unknown	3676 // nucleic acid binding // Unknown /// 3677 // DNA binding // Unknown /// 8270 // zinc ion binding // Unknown	chr19:42920908-42922104 (-) // 91.38 // q13.12	---
217967_s_at	C1orf24	chromosome 1 open reading frame 24	AF288391	116496	---	Q9BZQ8	6457 // protein folding // Unknown	---	31072 // heat shock protein binding // Unknown /// 51082 // unfolded protein binding // Unknown	chr1:181491824-181675339 (-) // 87.76 // q25.3	---
229937_x_at	LILRB1	Leukocyte immunoglobulin-like receptor, subfamily B (with TM and ITIM domains), member 1	AI681260	10859	604811	Q8NHL6	6955 // immune response // Unknown	16021 // integral to membrane // Unknown	4872 // receptor activity // Unknown	---	---
212446_s_at	LASS6	LAG1 longevity assurance homolog 6 (S. cerevisiae)	AI658534	253782	---	Q6ZMG9	6355 // regulation of transcription, DNA-dependent // Unknown /// 8610 // lipid biosynthesis // Unknown	5634 // nucleus // Unknown /// 16021 // integral to membrane // Unknown	3700 // transcription factor activity // Unknown	chr2:169453816-169457368 (+) // 97.62 // q24.3	---
204489_s_at	CD44	CD44 antigen (homing function and Indian blood group system)	NM_000610	960	107269	P16070 /// O95658 /// O95659 /// Q86T72 /// Q86UZ1 /// Q86Z27 /// Q99900 /// Q9UJ36 /// O95370 /// Q8N694	7155 // cell adhesion // Unknown /// 7160 // cell-matrix adhesion // Unknown /// 16337 // cell-cell adhesion // Unknown	5887 // integral to plasma membrane // Unknown /// 16020 // membrane // Unknown /// 16021 // integral to membrane // Unknown	4872 // receptor activity // Unknown /// 5515 // protein binding // Unknown /// 5518 // collagen binding // Unknown /// 5540 // hyaluronic acid binding // Unknown	chr11:35117398-35208149 (+) // 99.83 // p13	---
240572_s_at	LOC374443	CLR pseudogene	BF436632	374443	---	---	---	---	---	chr12:9697322-9697748 (+) // 93.22 // p13.31	---
214025_at	---	---	AI922937	---	---	---	---	---	---	chr16:66613605-66614115 (+) // 100.0 // q22.1	---
225571_at	LIFR	Leukemia inhibitory factor receptor	AA701657	3977	151443 /// 601559	P42702 /// Q6LCD9	7166 // cell surface receptor linked signal transduction // Unknown	5887 // integral to plasma membrane // Unknown	4872 // receptor activity // Unknown /// 4923 // leukemia inhibitory factor receptor activity // Unknown	chr5:38510821-38512867 (-) // 96.03 // p13.1	---
218197_s_at	OXR1	oxidation resistance 1	NM_018002	55074	605609	Q6ZVK9 /// Q8N8V0 /// Q9H266 /// Q9NWC7 /// Q8N573	6979 // response to oxidative stress // Unknown /// 16998 // cell wall catabolism // Unknown	---	---	chr15:46804832-46805830 (+) // 55.06 // q21.1 /// chr8:107792102-107833265 (+) // 99.94 // q23.1	---
211192_s_at	CD84	CD84 antigen (leukocyte antigen)	AF054818	8832	604513	Q6FHA8 /// O15430 /// O95660 /// Q8WWI8 /// Q9UIB6 /// Q9UIB7 /// Q9UIB8	6952 // defense response // Unknown /// 7156 // homophilic cell adhesion // Unknown	5887 // integral to plasma membrane // Unknown	---	chr1:157336611-157362367 (-) // 99.18 // q23.3	---
226713_at	C3orf6	chromosome 3 open reading frame 6	AI247881	152137	---	Q86VH7 /// Q8IVM0	---	---	---	chr3:192597657-192599160 (+) // 98.21 // q28	---
210676_x_at	RANBP2L1	RAN binding protein 2-like 1	U64675	84220	602752	O14715 /// Q99666 /// Q9H0B2	---	5643 // nuclear pore // Unknown	5488 // binding // Unknown /// 8536 // RAN protein binding // Unknown	chr2:109909340-109970929 (+) // 99.21 // q13 /// chr2:107901910-107965810 (+) // 97.0 // q12.3 /// chr2:87080940-87136539 (+) // 92.35 // p11.2 /// chr2:108794503-108843362 (+) // 89.15 // q13 /// chr2:110707729-110769611 (-) // 99.2 // q13 /// chr2:112843904-112907338 (-) // 99.14 // q13 /// chr2:106480087-106543339 (-) // 97.37 // q12.2 /// chr2:87910949-87964587 (-) // 93.97 // p11.2 /// chr2:…	---
232002_at	GPI	Glucose phosphate isomerase	AW843302	2821	172400	P06744	5975 // carbohydrate metabolism // Unknown /// 6094 // gluconeogenesis // Unknown /// 6096 // glycolysis // Unknown /// 6959 // humoral immune response // Unknown /// 7399 // neurogenesis // Unknown /// 7599 // hemostasis // Unknown	---	4347 // glucose-6-phosphate isomerase activity // Unknown /// 5125 // cytokine activity // Unknown /// 8083 // growth factor activity // Unknown /// 16853 // isomerase activity // Unknown	chr19:39568334-39571878 (+) // 82.85 // q13.11	Glycolysis_and_Gluconeogenesis // GenMAPP /// Glycolysis / Gluconeogenesis // KEGG /// Pentose phosphate pathway // KEGG /// Starch and sucrose metabolism // KEGG
243655_x_at	SMARCA4	SWI/SNF related, matrix associated, actin dependent regulator of chromatin, subfamily a, member 4	AA938663	6597	603254	P51532	6357 // regulation of transcription from Pol II promoter // Unknown	5634 // nucleus // Unknown /// 5654 // nucleoplasm // Unknown	3677 // DNA binding // Unknown /// 3700 // transcription factor activity // Unknown /// 3713 // transcription coactivator activity // Unknown /// 4386 // helicase activity // Unknown /// 5524 // ATP binding // Unknown	chr19:10973436-10973892 (+) // 59.01 // p13.2	---
206084_at	PTPRR	protein tyrosine phosphatase, receptor type, R	NM_002849	5801	602853	Q15256 /// Q68CP6 /// Q7Z2V8	1701 // embryonic development (sensu Mammalia) // Unknown /// 6470 // protein amino acid dephosphorylation // Unknown /// 7167 // enzyme linked receptor protein signaling pathway // Unknown	5887 // integral to plasma membrane // Unknown	4888 // transmembrane receptor activity // Unknown /// 5001 // transmembrane receptor protein tyrosine phosphatase activity // Unknown /// 16787 // hydrolase activity // Unknown /// 19901 // protein kinase binding // Unknown	chr12:69318128-69600853 (-) // 99.74 // q15	---
211796_s_at	TRBC1	T cell receptor beta constant 1	AF043179	28639	---	Q8N2T6 /// Q6GMV6	6955 // immune response // Unknown	16020 // membrane // Unknown	4872 // receptor activity // Unknown	chr7:141626192-142017053 (+) // 99.26 // q34	---
207952_at	IL5	interleukin 5 (colony-stimulating factor, eosinophil)	NM_000879	3567	147850	P05113	6954 // inflammatory response // Unknown /// 8284 // positive regulation of cell proliferation // Unknown	5576 // extracellular region // Unknown	5125 // cytokine activity // Unknown /// 5137 // interleukin-5 receptor binding // Unknown	chr5:131905034-131907113 (-) // 99.88 // q23.3	Inflammatory_Response_Pathway // GenMAPP
219049_at	ChGn	chondroitin beta1,4 N-acetylgalactosaminyltransferase	NM_018371	55790	---	Q8TDX6 /// Q8N1G8	7399 // neurogenesis // Unknown /// 8037 // cell recognition // Unknown /// 8283 // cell proliferation // Unknown /// 9653 // morphogenesis // Unknown /// 15014 // heparan sulfate proteoglycan biosynthesis, polysaccharide chain biosynthesis // Unknown /// 19276 // UDP-N-acetylgalactosamine metabolism // Unknown /// 30198 // extracellular matrix organization and biogenesis // Unknown /// 30206 // …	5622 // intracellular // Unknown /// 5625 // soluble fraction // Unknown /// 5794 // Golgi apparatus // Unknown /// 30173 // integral to Golgi membrane // Unknown	5515 // protein binding // Unknown /// 8955 // peptidoglycan glycosyltransferase activity // Unknown /// 16740 // transferase activity // Unknown /// 46872 // metal ion binding // Unknown /// 47237 // glucuronylgalactosylproteoglycan 4-beta-N-acetylgalactosaminyltransferase activity // Unknown /// 47238 // glucuronosyl-N-acetylgalactosaminyl-proteoglycan 4-beta-N-acetylgalactosaminyltransferase a…	chr8:19306089-19360371 (-) // 94.99 // p21.3	---
204493_at	BID	BH3 interacting domain death agonist	NM_001196	637	601997	P55957 /// Q71RF7 /// Q71T04 /// Q7Z4M9 /// Q8IY86	8625 // induction of apoptosis via death domain receptors // Unknown /// 8637 // apoptotic mitochondrial changes // Unknown /// 43065 // positive regulation of apoptosis // Unknown	5624 // membrane fraction // Unknown /// 5737 // cytoplasm // Unknown /// 5739 // mitochondrion // Unknown /// 5829 // cytosol // Unknown	5123 // death receptor binding // Unknown	chr22:16592531-16631780 (-) // 96.29 // q11.21	Apoptosis // GenMAPP /// Apoptosis_GenMAPP // GenMAPP
1564150_a_at	LOC256021	hypothetical protein LOC256021	AK055439	256021	---	---	---	---	---	chr12:90881333-91038915 (-) // 87.37 // q21.33	---
208090_s_at	AIRE	autoimmune regulator (autoimmune polyendocrinopathy candidiasis ectodermal dystrophy)	NM_000658	326	240300 /// 607358	O43918	6355 // regulation of transcription, DNA-dependent // Unknown /// 6959 // humoral immune response // Unknown	5634 // nucleus // Unknown /// 5737 // cytoplasm // Unknown	3700 // transcription factor activity // Unknown /// 45182 // translation regulator activity // Unknown	chr21:44534575-44542300 (+) // 98.38 // q22.3	---
204679_at	KCNK1	potassium channel, subfamily K, member 1	NM_002245	3775	601745	O00180	6811 // ion transport // Unknown /// 6813 // potassium ion transport // Unknown	5624 // membrane fraction // Unknown /// 8076 // voltage-gated potassium channel complex // Unknown /// 16021 // integral to membrane // Unknown	5242 // inward rectifier potassium channel activity // Unknown /// 5244 // voltage-gated ion channel activity // Unknown /// 5267 // potassium channel activity // Unknown	chr1:230056484-230114700 (+) // 92.51 // q42.2	---
219691_at	SAMD9	sterile alpha motif domain containing 9	NM_017654	54809	---	Q6P080 /// Q8IVG6 /// Q9NXS8	---	---	---	chr7:92373815-92377200 (-) // 85.39 // q21.2	---
228298_at	MGC16044	hypothetical protein MGC16044	BF056901	91523	---	Q96B20 /// Q96HM7	---	---	---	chr12:45916098-45916710 (+) // 95.03 // q13.11	---
215047_at	TRIM58	tripartite motif-containing 58	AL080170	25893	---	Q7Z3T1 /// Q8NG06 /// Q6B0H9	16567 // protein ubiquitination // Unknown	151 // ubiquitin ligase complex // Unknown	4842 // ubiquitin-protein ligase activity // Unknown /// 8270 // zinc ion binding // Unknown	chr1:244349956-244366751 (+) // 78.18 // q44	---
210852_s_at	AASS	aminoadipate-semialdehyde synthase	AF229180	10157	238700 /// 268700 /// 605113	Q9UDR5	6118 // electron transport // Unknown /// 6554 // lysine catabolism // Unknown /// 51262 // protein tetramerization // Unknown	5739 // mitochondrion // Unknown	10010 // lysine-ketoglutarate reductase activity // Unknown /// 16491 // oxidoreductase activity // Unknown /// 47130 // saccharopine dehydrogenase (NADP+, L-lysine-forming) activity // Unknown /// 47131 // saccharopine dehydrogenase (NAD+, L-glutamate-forming) activity // Unknown	chr7:121310246-121378219 (-) // 99.97 // q31.32	Lysine degradation // KEGG
227646_at	EBF	Early B-cell factor	BG435302	1879	164343	Q9UH73 /// Q6ZTF0	6355 // regulation of transcription, DNA-dependent // Unknown /// 7275 // development // Unknown	5634 // nucleus // Unknown	3677 // DNA binding // Unknown	chr5:158056464-158058280 (-) // 95.26 // q33.3	---
1555363_s_at	MGC39821	hypothetical protein MGC39821	BC034236	284440	---	Q8N4H9	---	---	---	chr19:18773380-19748189 (-) // 22.22 // p13.11	---
214829_at	AASS	aminoadipate-semialdehyde synthase	AK023446	10157	238700 /// 268700 /// 605113	Q9UDR5	6118 // electron transport // Unknown /// 6554 // lysine catabolism // Unknown /// 51262 // protein tetramerization // Unknown	5739 // mitochondrion // Unknown	10010 // lysine-ketoglutarate reductase activity // Unknown /// 16491 // oxidoreductase activity // Unknown /// 47130 // saccharopine dehydrogenase (NADP+, L-lysine-forming) activity // Unknown /// 47131 // saccharopine dehydrogenase (NAD+, L-glutamate-forming) activity // Unknown	chr7:121309507-121320158 (-) // 83.0 // q31.32	Lysine degradation // KEGG
230036_at	C7orf6	chromosome 7 open reading frame 6	BE669858	219285	---	Q8IVG5 /// Q8IWI4 /// Q8N3L9 /// Q8N875	---	---	---	chr7:92404020-92404602 (-) // 47.25 // q21.3	---
207426_s_at	TNFSF4	tumor necrosis factor (ligand) superfamily, member 4 (tax-transcriptionally activated glycoprotein 1, 34kDa)	NM_003326	7292	603594	P23510 /// Q6FGS4 /// Q8IV74	6955 // immune response // Unknown /// 7165 // signal transduction // Unknown /// 7267 // cell-cell signaling // Unknown /// 8284 // positive regulation of cell proliferation // Unknown	5887 // integral to plasma membrane // Unknown	5164 // tumor necrosis factor receptor binding // Unknown	chr1:169884530-169908008 (-) // 89.92 // q25.1	---
213194_at	ROBO1	roundabout, axon guidance receptor, homolog 1 (Drosophila)	BF059159	6091	602430	Q9Y6N7	6935 // chemotaxis // Unknown /// 7155 // cell adhesion // Unknown /// 7156 // homophilic cell adhesion // Unknown /// 7399 // neurogenesis // Unknown /// 50772 // positive regulation of axonogenesis // Unknown	5887 // integral to plasma membrane // Unknown /// 9986 // cell surface // Unknown	4872 // receptor activity // Unknown /// 8046 // axon guidance receptor activity // Unknown /// 42802 // protein self binding // Unknown	chr3:78729078-79721751 (-) // 99.07 // p12.3	---
222315_at	---	---	AW972855	---	---	---	---	---	---	---	---
232504_at	LOC285628	hypothetical protein LOC285628	AL389942	285628	---	---	---	---	---	chr5:159845026-159847023 (+) // 83.57 // q33.3	---
229497_at	LOC348094	hypothetical protein LOC348094	AI760630	348094	---	Q6PI29 /// Q8N7A0 /// Q8NBS5 /// Q8TAJ8	7165 // signal transduction // Unknown	---	5515 // protein binding // Unknown	chr15:63037627-63038086 (+) // 41.26 // q22.31	---
227177_at	CORO2A	Coronin, actin binding protein, 2A	AL515381	7464	602159	Q92828	6542 // glutamine biosynthesis // Unknown /// 6807 // nitrogen compound metabolism // Unknown /// 7242 // intracellular signaling cascade // Unknown	---	3779 // actin binding // Unknown /// 4356 // glutamate-ammonia ligase activity // Unknown /// 5515 // protein binding // Unknown	chr9:97962813-97964132 (-) // 81.59 // q22.33	---
204137_at	TM7SF1	transmembrane 7 superfamily member 1 (upregulated in kidney)	NM_003272	7107	604658	O60478 /// Q6FHI3	---	5624 // membrane fraction // Unknown /// 5887 // integral to plasma membrane // Unknown	---	chr1:232631914-232698247 (+) // 97.2 // q42.3	---
1562247_at	LOC286058	Hypothetical protein LOC286058	AL833160	286058	---	---	---	---	---	chr8:22592472-22597467 (-) // 69.69 // p21.3	---
210511_s_at	INHBA	inhibin, beta A (activin A, activin AB alpha polypeptide)	M13436	3624	147290	P08476 /// Q9HBP0 /// Q5HYA2	1501 // skeletal development // Unknown /// 1541 // ovarian follicle development // Unknown /// 6917 // induction of apoptosis // Unknown /// 6952 // defense response // Unknown /// 7050 // cell cycle arrest // Unknown /// 7166 // cell surface receptor linked signal transduction // Unknown /// 7267 // cell-cell signaling // Unknown /// 7399 // neurogenesis // Unknown /// 7498 // mesoderm developm…	5576 // extracellular region // Unknown	5125 // cytokine activity // Unknown /// 5160 // transforming growth factor beta receptor binding // Unknown /// 5179 // hormone activity // Unknown /// 5515 // protein binding // Unknown /// 8083 // growth factor activity // Unknown /// 17106 // activin inhibitor activity // Unknown	chr7:41502371-41513449 (-) // 90.39 // p14.1	TGF_Beta_Signaling_Pathway // GenMAPP
236423_at	---	---	AI022821	---	---	---	---	---	---	---	---
224141_at	MGC10701	hypothetical protein MGC10701	BC004487	84744	---	Q8N8Z4 /// Q9BSY8	---	---	---	chr2:108582505-108609170 (-) // 80.63 // q12.3	---
222453_at	CYBRD1	cytochrome b reductase 1	AL136693	79901	605745	Q6P147 /// Q6ZR51 /// Q9H0Q8 /// Q9H5G5	6118 // electron transport // Unknown	16021 // integral to membrane // Unknown	16740 // transferase activity // Unknown	chr2:172204493-172240144 (+) // 92.15 // q31.1	---
229686_at	P2RY8	purinergic receptor P2Y, G-protein coupled, 8	AI436587	286530	---	Q86VZ1	7186 // G-protein coupled receptor protein signaling pathway // Unknown	16021 // integral to membrane // Unknown	1584 // rhodopsin-like receptor activity // Unknown /// 4872 // receptor activity // Unknown /// 45028 // purinergic nucleotide receptor activity, G-protein coupled // Unknown	chrX:1625295-1625850 (-) // 70.81 // p22.33 /// chrY:1625295-1625850 (-) // 70.81 // p11.32	---
211333_s_at	FASLG	Fas ligand (TNF superfamily, member 6)	AF288573	356	134638 /// 152700	P48023	6915 // apoptosis // Unknown /// 6917 // induction of apoptosis // Unknown /// 6955 // immune response // Unknown /// 7165 // signal transduction // Unknown /// 7267 // cell-cell signaling // Unknown /// 43123 // positive regulation of I-kappaB kinase/NF-kappaB cascade // Unknown	5576 // extracellular region // Unknown /// 5887 // integral to plasma membrane // Unknown	5164 // tumor necrosis factor receptor binding // Unknown	chr1:169359940-169366872 (+) // 91.5 // q24.3	Apoptosis // GenMAPP /// Apoptosis_GenMAPP // GenMAPP /// Apoptosis_KEGG // GenMAPP
1568791_s_at	---	Homo sapiens, clone IMAGE:5266257, mRNA	AI208948	---	---	---	---	---	---	chr13:77300377-77380818 (+) // 92.7 // q22.3	---
228048_at	C10orf41	chromosome 10 open reading frame 41	AI302262	283065	---	---	---	---	---	chr10:76833710-76838072 (+) // 91.44 // q22.2	---
228367_at	ALPK2	alpha-kinase 2	BE551416	115701	---	Q6ZUX0 /// Q86TB3 /// Q8NAT5 /// Q96L95	6468 // protein amino acid phosphorylation // Unknown	---	4674 // protein serine/threonine kinase activity // Unknown /// 5524 // ATP binding // Unknown /// 16301 // kinase activity // Unknown	chr18:54299463-54300328 (-) // 96.21 // q21.31	---
1553344_at	PCDH15	protocadherin 15	AY029205	65217	602083 /// 605514	Q96QU1 /// Q6TRH8 /// Q8NDB9	7155 // cell adhesion // Unknown /// 7156 // homophilic cell adhesion // Unknown /// 7601 // visual perception // Unknown /// 7605 // perception of sound // Unknown	16020 // membrane // Unknown /// 16021 // integral to membrane // Unknown	5509 // calcium ion binding // Unknown /// 5515 // protein binding // Unknown	chr10:55250865-56231057 (-) // 96.44 // q21.1	---
228441_s_at	PET112L	PET112-like (yeast)	BE550153	5188	603645	O75879 /// Q63Z41 /// Q9P0S6	6412 // protein biosynthesis // Unknown	5739 // mitochondrion // Unknown	8135 // translation factor activity, nucleic acid binding // Unknown /// 16874 // ligase activity // Unknown /// 17068 // glutamyl-tRNA(Gln) amidotransferase activity // Unknown	chr4:152947866-152949259 (+) // 94.46 // q31.3	---
206379_at	EYA3	eyes absent homolog 3 (Drosophila)	NM_001990	2140	601655	Q99504 /// Q9HDB0 /// Q8IVX7	6355 // regulation of transcription, DNA-dependent // Unknown /// 7275 // development // Unknown /// 7601 // visual perception // Unknown /// 8152 // metabolism // Unknown /// 9653 // morphogenesis // Unknown	5634 // nucleus // Unknown	287 // magnesium ion binding // Unknown /// 3824 // catalytic activity // Unknown /// 4721 // phosphoprotein phosphatase activity // Unknown /// 4725 // protein tyrosine phosphatase activity // Unknown /// 16787 // hydrolase activity // Unknown	chr1:27984961-28046331 (-) // 94.04 // p35.3	---
210663_s_at	KYNU	kynureninase (L-kynurenine hydrolase)	BC000879	8942	236800	Q16719 /// Q9BVW3	6569 // tryptophan catabolism // Unknown /// 9435 // NAD biosynthesis // Unknown	5737 // cytoplasm // Unknown	8233 // peptidase activity // Unknown /// 30170 // pyridoxal phosphate binding // Unknown /// 30429 // kynureninase activity // Unknown	chr2:143468957-143580836 (+) // 97.74 // q22.2	Tryptophan metabolism // KEGG
210044_s_at	LYL1	lymphoblastic leukemia derived sequence 1	BC002796	4066	151440	P12980	6355 // regulation of transcription, DNA-dependent // Unknown	5634 // nucleus // Unknown	3677 // DNA binding // Unknown	chr19:13070847-13074684 (-) // 98.22 // p13.13	---
230624_at	SLC25A27	solute carrier family 25, member 27	AW779950	9481	---	O95847 /// Q8N518	6091 // generation of precursor metabolites and energy // Unknown /// 6810 // transport // Unknown /// 6839 // mitochondrial transport // Unknown	5739 // mitochondrion // Unknown /// 5743 // mitochondrial inner membrane // Unknown /// 16020 // membrane // Unknown /// 16021 // integral to membrane // Unknown	5215 // transporter activity // Unknown /// 5488 // binding // Unknown	chr6:46753439-46753884 (+) // 88.07 // p12.3	Electron_Transport_Chain // GenMAPP
220507_s_at	UPB1	ureidopropionase, beta	NM_016327	51733	606673	Q9UBR1 /// Q6AHZ8 /// Q5HYN3	6807 // nitrogen compound metabolism // Unknown	---	3837 // beta-ureidopropionase activity // Unknown /// 16810 // hydrolase activity, acting on carbon-nitrogen (but not peptide) bonds // Unknown	chr22:23215865-23247106 (+) // 74.18 // q11.23	---
243362_s_at	LEF1	lymphoid enhancer-binding factor 1	AA992805	51176	153245	Q9UJU2 /// Q659G9 /// Q8WUE9	6355 // regulation of transcription, DNA-dependent // Unknown /// 16055 // Wnt receptor signaling pathway // Unknown	5634 // nucleus // Unknown	3700 // transcription factor activity // Unknown	chr4:109454468-109455186 (+) // 94.35 // q25	TGF_Beta_Signaling_Pathway // GenMAPP
222161_at	NAALAD2	N-acetylated alpha-linked acidic dipeptidase 2	AJ012370	10003	---	Q9Y3Q0 /// Q8IUX3	6508 // proteolysis and peptidolysis // Unknown	16021 // integral to membrane // Unknown	4180 // carboxypeptidase activity // Unknown /// 4274 // dipeptidyl-peptidase IV activity // Unknown /// 8233 // peptidase activity // Unknown /// 8237 // metallopeptidase activity // Unknown /// 16805 // dipeptidase activity // Unknown /// 43275 // glutamate carboxypeptidase II activity // Unknown	chr11:89507529-89565424 (+) // 81.38 // q14.3	---
209795_at	CD69	CD69 antigen (p60, early T-cell activation antigen)	L07555	969	107273	Q07108	6952 // defense response // Unknown /// 7166 // cell surface receptor linked signal transduction // Unknown	5887 // integral to plasma membrane // Unknown	4888 // transmembrane receptor activity // Unknown /// 5529 // sugar binding // Unknown	chr12:9796352-9804756 (-) // 99.64 // p13.31	---
218950_at	CENTD3	centaurin, delta 3	NM_022481	64411	606647	Q8WWN8 /// Q9H7C1 /// Q96G49	7165 // signal transduction // Unknown /// 43087 // regulation of GTPase activity // Unknown	---	---	chr5:141013151-141015445 (-) // 91.86 // q31.3	---
208409_at	SLC14A2	solute carrier family 14 (urea transporter), member 2	NM_007163	8170	601611	Q15849 /// Q8TEC4 /// Q96PH5	6810 // transport // Unknown /// 15840 // urea transport // Unknown	5624 // membrane fraction // Unknown /// 16021 // integral to membrane // Unknown	15204 // urea transporter activity // Unknown	chr18:41500104-41517066 (+) // 76.72 // q12.3	---
244461_at	HCMOGT-1	sperm antigen HCMOGT-1	AI539783	92521	608793	Q86XT8 /// Q8N4U4 /// Q8WU84 /// Q9HCQ3	---	---	---	chr17:20081631-20082796 (+) // 73.23 // p11.2	---
240827_at	FLJ45983	FLJ45983 protein	AA846824	399717	---	Q6ZQR6	---	---	---	chr10:8134211-8135418 (-) // 97.1 // p14	---
224895_at	YAP1	Yes-associated protein 1, 65kDa	AA557632	10413	606608	Q7Z574 /// Q86T74 /// Q8IUY9 /// Q8TAQ4	---	---	5515 // protein binding // Unknown	chr11:101607702-101609359 (+) // 90.8 // q22.2	---
212148_at	PBX1	Pre-B-cell leukemia transcription factor 1	AL049381	5087	176310	P40424 /// Q68DD6	6355 // regulation of transcription, DNA-dependent // Unknown /// 6366 // transcription from Pol II promoter // Unknown /// 6700 // C21-steroid hormone biosynthesis // Unknown /// 7548 // sex differentiation // Unknown /// 9790 // embryonic development // Unknown /// 30902 // hindbrain development // Unknown /// 45898 // regulation of transcriptional preinitiation complex formation // Unknown	5634 // nucleus // Unknown	3700 // transcription factor activity // Unknown /// 5515 // protein binding // Unknown	chr1:161548011-161552725 (+) // 91.39 // q23.3	---
233253_at	---	CDNA FLJ14147 fis, clone MAMMA1002973	AU148234	---	---	---	---	---	---	chrX:71214987-71217543 (+) // 40.29 // q13.1	---
209602_s_at	GATA3	GATA binding protein 3	AI796169	2625	131320 /// 146255	P23771 /// Q96J04	6355 // regulation of transcription, DNA-dependent // Unknown /// 6366 // transcription from Pol II promoter // Unknown /// 6952 // defense response // Unknown /// 7605 // perception of sound // Unknown /// 9653 // morphogenesis // Unknown	5634 // nucleus // Unknown	3700 // transcription factor activity // Unknown	chr10:8136675-8157219 (+) // 95.62 // p14	---
210166_at	TLR5	toll-like receptor 5	AF051151	7100	603031 /// 608556	O60602	6954 // inflammatory response // Unknown	16021 // integral to membrane // Unknown	4888 // transmembrane receptor activity // Unknown	chr1_random:2899005-2932110 (-) // 94.58 //	---
215111_s_at	TGFB1I4	transforming growth factor beta 1 induced transcript 4	AK027071	8848	607715	Q15714 /// Q6AHX5 /// Q8NCN1	6355 // regulation of transcription, DNA-dependent // Unknown /// 6366 // transcription from Pol II promoter // Unknown	5634 // nucleus // Unknown	3700 // transcription factor activity // Unknown	chr13:43905660-44047255 (-) // 98.11 // q14.11	---
223550_s_at	CA10	carbonic anhydrase X	AF288385	56934	604642	Q9NS85 /// Q68D28 /// Q6ZMR7	6730 // one-carbon compound metabolism // Unknown /// 7420 // brain development // Unknown	---	4089 // carbonate dehydratase activity // Unknown /// 8270 // zinc ion binding // Unknown	chr17:47062672-47592367 (-) // 96.17 // q21.33	---
1570035_at	TBC1D10	TBC1 domain family, member 10	BC007908	83874	---	Q9BXI6 /// Q6ZNK8 /// Q96ND9 /// Q8WTX7	---	5902 // microvillus // Unknown	30165 // PDZ domain binding // Unknown	chr22:29037017-29039519 (-) // 53.28 // q12.2	---
205943_at	TDO2	tryptophan 2,3-dioxygenase	NM_005651	6999	191070	P48775	6568 // tryptophan metabolism // Unknown /// 42133 // neurotransmitter metabolism // Unknown	---	4833 // tryptophan 2,3-dioxygenase activity // Unknown /// 16491 // oxidoreductase activity // Unknown	chr4:157182451-157199155 (+) // 97.2 // q32.1	Tryptophan metabolism // KEGG
212203_x_at	IFITM3	interferon induced transmembrane protein 3 (1-8U)	BF338947	10410	605579	Q01628	6955 // immune response // Unknown /// 9607 // response to biotic stimulus // Unknown	16021 // integral to membrane // Unknown	---	chr11:309676-310900 (-) // 94.89 // p15.5	---
213888_s_at	T3JAM	TRAF3-interacting Jun N-terminal kinase (JNK)-activating modulator	AL022398	80342	608255	Q9Y228 /// Q6ZTW8	---	16021 // integral to membrane // Unknown	---	chr1:206317888-206341394 (+) // 95.6 // q32.2	---
210692_s_at	SLC43A3	solute carrier family 43, member 3	BC003163	29015	---	Q8NBI5 /// Q9UHU3 /// Q9NSS4	---	---	---	chr11:56931730-56951149 (-) // 95.72 // q12.1	---
227749_at	---	Transcribed locus	AI703496	---	---	---	---	---	---	chr19:47282104-47282702 (-) // 94.2 // q13.2	---
1558107_at	---	---	BG542899	---	---	---	---	---	---	chr20:28225551-28266639 (+) // 35.41 // q11.1	---
233916_at	KIAA1486	KIAA1486 protein	AB040919	57624	---	Q96NL2 /// Q9P242	---	---	---	chr2:226091133-226344239 (+) // 93.51 // q36.3	---
214079_at	DHRS2	dehydrogenase/reductase (SDR family) member 2	AK000345	10202	---	Q13268 /// Q7Z789	5975 // carbohydrate metabolism // Unknown /// 8152 // metabolism // Unknown	5634 // nucleus // Unknown	4022 // alcohol dehydrogenase activity // Unknown /// 5489 // electron transporter activity // Unknown /// 16491 // oxidoreductase activity // Unknown	chr14:23182093-23184686 (+) // 93.18 // q11.2	---
209591_s_at	BMP7	bone morphogenetic protein 7 (osteogenic protein 1)	M60316	655	112267	P18075 /// Q9BTB3	1501 // skeletal development // Unknown /// 40007 // growth // Unknown	---	5125 // cytokine activity // Unknown /// 8083 // growth factor activity // Unknown	chr20:55179365-55274681 (-) // 100.0 // q13.31	---
211339_s_at	ITK	IL2-inducible T-cell kinase	D13720	3702	186973	Q08881 /// Q7Z318	6468 // protein amino acid phosphorylation // Unknown /// 6968 // cellular defense response // Unknown /// 7242 // intracellular signaling cascade // Unknown	---	4715 // non-membrane spanning protein tyrosine kinase activity // Unknown /// 5524 // ATP binding // Unknown /// 16740 // transferase activity // Unknown	chr5:156540484-156614687 (+) // 93.56 // q33.3	---
240819_at	---	---	R00854	---	---	---	---	---	---	chr1:177655624-177656081 (+) // 32.39 // q25.3	---
230941_at	LOC400988	hypothetical LOC400988	AI651340	400988	---	---	---	---	---	chr2:97777498-97778046 (+) // 97.33 // q11.2	---
1559045_at	---	CDNA FLJ37541 fis, clone BRCAN2026340	AK094860	---	---	Q8N1U9	---	---	---	chr17:8202849-8204554 (-) // 52.24 // p13.1	---
204604_at	PFTK1	PFTAIRE protein kinase 1	NM_012395	5218	---	O94921	6468 // protein amino acid phosphorylation // Unknown	5634 // nucleus // Unknown /// 5737 // cytoplasm // Unknown	4674 // protein serine/threonine kinase activity // Unknown /// 5524 // ATP binding // Unknown /// 16740 // transferase activity // Unknown	chr7:89983362-90484555 (+) // 98.43 // q21.13	---
216575_at	---	---	AL035604	---	---	---	---	---	---	chr6:135998894-135999544 (-) // 81.69 // q23.3	---
202241_at	TRIB1	tribbles homolog 1 (Drosophila)	NM_025195	10221	---	O15180 /// Q96RU8 /// Q9H2Y8	6468 // protein amino acid phosphorylation // Unknown /// 8283 // cell proliferation // Unknown	5737 // cytoplasm // Unknown	4672 // protein kinase activity // Unknown /// 5524 // ATP binding // Unknown	chr8:126512053-126519825 (+) // 94.33 // q24.13	---
235522_at	---	---	AA262688	---	---	---	---	---	---	chr12:9742977-9743420 (+) // 58.01 // p13.31	---
206710_s_at	EPB41L3	erythrocyte membrane protein band 4.1-like 3	NM_012307	23136	605331	Q9Y2J2 /// Q8NFG9 /// Q96HL7	30866 // cortical actin cytoskeleton organization and biogenesis // Unknown	5737 // cytoplasm // Unknown /// 5856 // cytoskeleton // Unknown /// 5886 // plasma membrane // Unknown	3779 // actin binding // Unknown /// 5198 // structural molecule activity // Unknown /// 5488 // binding // Unknown	chr18:5382844-5533968 (-) // 96.62 // p11.31	---
224790_at	DDEF1	development and differentiation enhancing factor 1	AI023398	50807	605953	Q9ULH1 /// Q8WWA4 /// Q96NR6 /// Q9NYZ7 /// Q9NZY1	43087 // regulation of GTPase activity // Unknown	16020 // membrane // Unknown	5096 // GTPase activator activity // Unknown	chr8:131133534-131262290 (-) // 98.22 // q24.21	---
1568817_at	---	Homo sapiens, clone IMAGE:4399978, mRNA	BC020585	---	---	---	---	---	---	chr21:45844165-45847011 (+) // 49.82 // q22.3	---
232176_at	SLITRK6	SLIT and NTRK-like family, member 6	R70320	84189	---	Q9H5Y7	---	16021 // integral to membrane // Unknown	---	chr13:85265473-85268054 (-) // 99.82 // q31.1	---
219975_x_at	THEDC1	thioesterase domain containing 1	NM_018324	55301	---	Q9NV23 /// Q9NUW1	6633 // fatty acid biosynthesis // Unknown /// 9058 // biosynthesis // Unknown	---	4320 // oleoyl-[acyl-carrier protein] hydrolase activity // Unknown /// 16788 // hydrolase activity, acting on ester bonds // Unknown	chr10:15125967-15155857 (+) // 75.81 // p13	---
206140_at	LHX2	LIM homeobox 2	NM_004789	9355	603759	P50458	6355 // regulation of transcription, DNA-dependent // Unknown	5634 // nucleus // Unknown	3700 // transcription factor activity // Unknown /// 8270 // zinc ion binding // Unknown	chr9:123854215-123874990 (+) // 79.5 // q33.3	---
233070_at	ZNF197	zinc finger protein 197	AL117657	10168	---	O14709 /// Q15917 /// Q6PIQ2 /// Q86VG0 /// Q07644 /// Q7Z6G1	6355 // regulation of transcription, DNA-dependent // Unknown	5634 // nucleus // Unknown	3676 // nucleic acid binding // Unknown /// 3700 // transcription factor activity // Unknown /// 8270 // zinc ion binding // Unknown	chr3:44662171-44663767 (+) // 27.77 // p21.32	---
212338_at	MYO1D	myosin ID	AA621962	4642	606539	O94832 /// Q6ZR34 /// Q8N618 /// Q7Z3N6	---	16459 // myosin // Unknown	3774 // motor activity // Unknown /// 3779 // actin binding // Unknown /// 5516 // calmodulin binding // Unknown /// 5524 // ATP binding // Unknown	chr17:27701969-28127155 (-) // 99.73 // q11.2	---
242714_at	MAP3K5	Mitogen-activated protein kinase kinase kinase 5	AW500340	4217	602448	Q99683	165 // MAPKKK cascade // Unknown /// 6468 // protein amino acid phosphorylation // Unknown /// 6915 // apoptosis // Unknown /// 6950 // response to stress // Unknown /// 7257 // activation of JNK // Unknown /// 8624 // induction of apoptosis by extracellular signals // Unknown	---	287 // magnesium ion binding // Unknown /// 4674 // protein serine/threonine kinase activity // Unknown /// 4709 // MAP kinase kinase kinase activity // Unknown /// 5524 // ATP binding // Unknown /// 16740 // transferase activity // Unknown	chr6:137148384-137149211 (+) // 64.42 // q23.3	---
243692_at	GATA4	GATA binding protein 4	AW181962	2626	600576 /// 607941	P43694 /// Q16365 /// Q8WYX6	6350 // transcription // Unknown /// 6355 // regulation of transcription, DNA-dependent // Unknown /// 6366 // transcription from Pol II promoter // Unknown /// 7275 // development // Unknown /// 7507 // heart development // Unknown /// 45893 // positive regulation of transcription, DNA-dependent // Unknown /// 45941 // positive regulation of transcription // Unknown	5634 // nucleus // Unknown	3677 // DNA binding // Unknown /// 3700 // transcription factor activity // Unknown /// 3702 // RNA polymerase II transcription factor activity // Unknown /// 5515 // protein binding // Unknown /// 8270 // zinc ion binding // Unknown /// 16563 // transcriptional activator activity // Unknown	chr8:11604719-11605443 (+) // 87.98 // p23.1	---
206100_at	CPM	carboxypeptidase M	NM_001874	1368	114860	P14384	6508 // proteolysis and peptidolysis // Unknown /// 6725 // aromatic compound metabolism // Unknown /// 9653 // morphogenesis // Unknown	5886 // plasma membrane // Unknown	4182 // carboxypeptidase A activity // Unknown /// 8199 // ferric iron binding // Unknown /// 8237 // metallopeptidase activity // Unknown /// 16787 // hydrolase activity // Unknown	chr12:67535803-67612889 (-) // 83.36 // q15	---
1566486_at	---	CDNA FLJ38354 fis, clone FEBRA1000183	AL359607	---	---	---	---	---	---	chr3:68228279-68231025 (-) // 48.53 // p14.1	---
224444_s_at	MGC14801	hypothetical protein MGC14801 /// hypothetical protein MGC14801	BC005997	84791	---	Q9BRT7	---	---	---	chr1:207944555-207994272 (+) // 90.94 // q32.3	---
243366_s_at	ITGA4	Integrin, alpha 4 (antigen CD49D, alpha 4 subunit of VLA-4 receptor)	AI936034	3676	192975	P13612 /// Q6PJE7 /// Q6ZVF4 /// Q8IU66 /// Q8IU71 /// Q8IUA2 /// Q68EM9 /// Q7Z4L6	---	---	---	chr2:182228514-182228913 (+) // 98.19 // q31.3	Integrin-mediated_cell_adhesion_KEGG // GenMAPP
211182_x_at	RUNX1	runt-related transcription factor 1 (acute myeloid leukemia 1; aml1 oncogene)	AF312387	861	151385 /// 180300 /// 601399 /// 601626	Q01196 /// Q15342 /// Q15344	6355 // regulation of transcription, DNA-dependent // Unknown /// 7275 // development // Unknown	5634 // nucleus // Unknown	3700 // transcription factor activity // Unknown /// 5524 // ATP binding // Unknown	chr21:35128576-35181279 (-) // 82.07 // q22.12	---
1555240_s_at	GNG12	guanine nucleotide binding protein (G protein), gamma 12	AF493879	55970	---	Q9UBI6	7165 // signal transduction // Unknown /// 7186 // G-protein coupled receptor protein signaling pathway // Unknown	5834 // heterotrimeric G-protein complex // Unknown	4871 // signal transducer activity // Unknown	chr1:67883147-68011154 (-) // 88.89 // p31.2	G_Protein_Signaling // GenMAPP /// Calcium_regulation_in_cardiac_cells // GenMAPP /// Smooth_muscle_contraction // GenMAPP
1557437_a_at	---	---	AW273830	---	---	---	---	---	---	---	---
203505_at	ABCA1	ATP-binding cassette, sub-family A (ABC1), member 1	AF285167	19	105150 /// 143890 /// 205400 /// 600046 /// 604091	O95477 /// Q6ZNR3 /// Q9H7T8 /// Q9NP93 /// Q9NS76	6810 // transport // Unknown /// 8203 // cholesterol metabolism // Unknown	5624 // membrane fraction // Unknown /// 5887 // integral to plasma membrane // Unknown	166 // nucleotide binding // Unknown /// 5524 // ATP binding // Unknown /// 8509 // anion transporter activity // Unknown /// 15248 // sterol transporter activity // Unknown /// 16887 // ATPase activity // Unknown /// 42626 // ATPase activity, coupled to transmembrane movement of substances // Unknown	chr9:104622849-104769967 (-) // 98.56 // q31.1	Statin_Pathway_PharmGKB // GenMAPP
207401_at	PROX1	prospero-related homeobox 1	NM_002763	5629	601546	Q92786 /// Q8TB91 /// Q8TBA4	---	---	---	chr1:210549680-210597677 (+) // 91.48 // q41	---
212741_at	MAOA	monoamine oxidase A	AA923354	4128	309850	P21397	6118 // electron transport // Unknown /// 6584 // catecholamine metabolism // Unknown /// 7610 // behavior // Unknown /// 42135 // neurotransmitter catabolism // Unknown	5739 // mitochondrion // Unknown /// 16021 // integral to membrane // Unknown	8131 // amine oxidase activity // Unknown /// 16491 // oxidoreductase activity // Unknown	chrX:43359942-43362318 (+) // 98.63 // p11.3	Biogenic_Amine_Synthesis // GenMAPP /// Glycine, serine and threonine metabolism // KEGG /// Arginine and proline metabolism // KEGG /// Histidine metabolism // KEGG /// Tyrosine metabolism // KEGG /// Phenylalanine metabolism // KEGG /// Tryptophan metabolism // KEGG
230250_at	PTPRB	Protein tyrosine phosphatase, receptor type, B	AI670852	5787	176882	P23467 /// Q68D73 /// Q6AWC4 /// Q6MZF6 /// Q6ZR19 /// Q6ZTX7 /// Q86VA4	6470 // protein amino acid dephosphorylation // Unknown /// 6796 // phosphate metabolism // Unknown	5624 // membrane fraction // Unknown /// 5887 // integral to plasma membrane // Unknown	5001 // transmembrane receptor protein tyrosine phosphatase activity // Unknown /// 16787 // hydrolase activity // Unknown	chr12:69199680-69200585 (-) // 99.89 // q15	---
205749_at	CYP1A1	cytochrome P450, family 1, subfamily A, polypeptide 1	NM_000499	1543	108330	P04798	6118 // electron transport // Unknown	5783 // endoplasmic reticulum // Unknown /// 5792 // microsome // Unknown /// 16020 // membrane // Unknown	19825 // oxygen binding // Unknown /// 50381 // unspecific monooxygenase activity // Unknown	chr15:72798942-72804930 (-) // 99.92 // q24.1	Fatty acid metabolism // KEGG /// gamma-Hexachlorocyclohexane degradation // KEGG /// Tryptophan metabolism // KEGG
223939_at	SUCNR1	succinate receptor 1	AF348078	56670	606381	Q9BXA5	7186 // G-protein coupled receptor protein signaling pathway // Unknown	16021 // integral to membrane // Unknown	1584 // rhodopsin-like receptor activity // Unknown /// 16526 // G-protein coupled receptor activity, unknown ligand // Unknown /// 45028 // purinergic nucleotide receptor activity, G-protein coupled // Unknown	chr3:153081043-153082349 (+) // 94.64 // q25.1	GPCRDB_Class_A_Rhodopsin-like // GenMAPP
236285_at	MGC16635	Hypothetical protein BC009980	AI631846	113730	---	Q96G42	---	---	---	chr22:49278822-49279593 (+) // 74.9 // q13.33	---
216565_x_at	LOC391020	similar to Interferon-induced transmembrane protein 3 (Interferon-inducible protein 1-8U)	AL121994	391020	---	---	---	---	---	chr1:25196849-25197251 (-) // 100.0 // p36.11	---
214669_x_at	LOC440871	similar to Ig kappa variable region	BG485135	440871	---	---	---	---	---	chr2:89849177-89849709 (+) // 46.12 // p11.2	---
1553211_at	FLJ38335	hypothetical protein FLJ38335	NM_153228	162282	---	Q8N533 /// Q8N957	---	---	---	chr17:51585834-51915006 (+) // 99.84 // q23.2	---
43427_at	LOC283445	hypothetical protein LOC283445	AI970898	283445	---	---	---	---	---	chr12:108168367-108168748 (+) // 99.74 // q24.11	---
236037_at	LOC202451	hypothetical protein LOC202451	AI800896	202451	---	Q8TBB3	---	---	---	chr6:138703167-138704024 (+) // 73.86 // q23.3	---
1566362_at	---	---	AA585152	---	---	---	---	---	---	chr10:98088109-98088309 (-) // 100.0 // q24.1	---
228906_at	CXXC6	CXXC finger 6	AI968175	80312	607790	Q7Z6B6 /// Q8NFU7 /// Q8TCR1 /// Q9C0I7	---	---	3677 // DNA binding // Unknown /// 8270 // zinc ion binding // Unknown	chr10:70076695-70124250 (+) // 99.45 // q21.3	---
228425_at	---	Homo sapiens, clone IMAGE:4826696, mRNA	BF056746	---	---	Q7Z3M5	---	---	---	chr2:113733260-113740817 (+) // 87.87 // q13	---
243281_at	---	Transcribed locus	AW188311	---	---	---	---	---	---	chr9:14594286-14594735 (-) // 60.22 // p22.3	---
229569_at	---	CDNA clone IMAGE:5263455, partial cds	AW572379	---	---	---	---	---	---	chr17:65060930-65061597 (+) // 98.81 // q24.3	---
239782_at	---	---	AI802099	---	---	---	---	---	---	chr3:140725950-140726550 (-) // 95.51 // q23	---
231341_at	SLC35D3	Solute carrier family 35, member D3	BE670584	340146	---	Q6NX71	---	---	---	chr6:137288014-137288490 (+) // 99.17 // q23.3	---
210373_at	TUSC4	tumor suppressor candidate 4	AF040708	10641	607072	Q8WTW4	45786 // negative regulation of cell cycle // Unknown	---	---	chr3:50359925-50363139 (-) // 98.47 // p21.31	---
230483_at	---	Transcribed locus, moderately similar to XP_509796.1 similar to CGI-145 protein [Pan troglodytes]	AA868500	---	---	---	---	---	---	chr13:51926912-51927459 (-) // 98.2 // q14.3	---
228051_at	LOC202451	hypothetical protein LOC202451	AI979261	202451	---	Q8TBB3	---	---	---	chr6:138706308-138707493 (+) // 99.92 // q23.3	---
242881_x_at	LOC389048	hypothetical LOC389048	BG285837	389048	---	---	---	---	---	chr14:18732801-18733445 (+) // 96.55 // q11.1 /// chr2:132289063-132289699 (+) // 92.49 // q21.1 /// chr14:18981915-18982561 (-) // 96.85 // q11.1 /// chr22:14559605-14560250 (-) // 96.55 // q11.1	---
232114_at	MED12L	mediator of RNA polymerase II transcription, subunit 12 homolog (yeast)-like	BF970855	116931	---	Q86YW9 /// Q96PC7 /// Q96PC8 /// Q9H9M5 /// Q9HCD7 /// Q9UI69	---	---	4872 // receptor activity // Unknown	chr3:152550543-152634649 (+) // 98.25 // q25.1	---
1557050_at	---	Homo sapiens, clone IMAGE:5019307, mRNA	CA448125	---	---	---	---	---	---	chr7:26909287-26912825 (+) // 99.78 // p15.2	---
209529_at	PPAP2C	phosphatidic acid phosphatase type 2C	AF047760	8612	607126	O43688	---	16021 // integral to membrane // Unknown	4721 // phosphoprotein phosphatase activity // Unknown /// 8195 // phosphatidate phosphatase activity // Unknown /// 16787 // hydrolase activity // Unknown	chr19:232371-242379 (-) // 100.0 // p13.3	Glycerolipid metabolism // KEGG /// Glycerophospholipid metabolism // KEGG /// Glycosphingolipid metabolism // KEGG
229670_at	---	---	BF056369	---	---	---	---	---	---	chr1:164409134-164409587 (+) // 51.36 // q24.2	---
210664_s_at	TFPI	tissue factor pathway inhibitor (lipoprotein-associated coagulation inhibitor)	AF021834	7035	152310	P10646	7596 // blood coagulation // Unknown	5576 // extracellular region // Unknown	4867 // serine-type endopeptidase inhibitor activity // Unknown	chr2:188168813-188244664 (-) // 94.74 // q32.1	---
211781_x_at	---	---	BC006164	---	---	---	---	---	---	---	---
206546_at	SYCP2	synaptonemal complex protein 2	NM_014258	10388	604105	Q9BX26 /// Q8IWA1	910 // cytokinesis // Unknown /// 7126 // meiosis // Unknown /// 7130 // synaptonemal complex formation // Unknown	795 // synaptonemal complex // Unknown /// 5634 // nucleus // Unknown	3677 // DNA binding // Unknown	chr20:57872402-57930876 (-) // 99.42 // q13.33	---
229826_at	LOC440957	similar to CG32736-PA	BF573638	440957	---	Q8WVI0	---	---	---	chr3:52545660-52549582 (+) // 92.47 // p21.1	---
228739_at	---	Cilia-associated protein (CYS1)	AI139413	---	---	Q717R9 /// Q8NCU6	---	---	---	chr2:10147200-10148375 (-) // 92.59 // p25.1	---
205484_at	SIT	SHP2-interacting transmembrane adaptor protein /// SHP2-interacting transmembrane adaptor protein	NM_014450	27240	604964	Q9Y3P8	7165 // signal transduction // Unknown /// 50863 // regulation of T-cell activation // Unknown	5887 // integral to plasma membrane // Unknown	5070 // SH3/SH2 adaptor protein activity // Unknown /// 5515 // protein binding // Unknown /// 19900 // kinase binding // Unknown	---	---
225162_at	EVE1	SH3 domain protein D19	BG285417	152503	608674	Q6PJX8 /// Q86XB3 /// Q8N5E7 /// Q9UFC8 /// Q5U3B8 /// Q5HYK7	---	---	---	chr4:152398792-152426774 (-) // 93.5 // q31.3	---
244699_at	---	Transcribed locus, weakly similar to XP_512674.1 similar to U1 small nuclear ribonucleoprotein A (U1 snRNP protein A) (U1A protein) (U1-A) [Pan troglodytes]	AV658469	---	---	---	---	---	---	chr6:135664735-135665386 (-) // 64.13 // q23.3	---
1557905_s_at	CD44	CD44 antigen (homing function and Indian blood group system)	AL552534	960	107269	P16070 /// O95658 /// O95659 /// Q86T72 /// Q86UZ1 /// Q86Z27 /// Q99900 /// Q9UJ36 /// O95370 /// Q8N694	7155 // cell adhesion // Unknown /// 7160 // cell-matrix adhesion // Unknown /// 16337 // cell-cell adhesion // Unknown	5887 // integral to plasma membrane // Unknown /// 16020 // membrane // Unknown /// 16021 // integral to membrane // Unknown	4872 // receptor activity // Unknown /// 5515 // protein binding // Unknown /// 5518 // collagen binding // Unknown /// 5540 // hyaluronic acid binding // Unknown	chr11:35116992-35199842 (+) // 96.88 // p13	---
234970_at	MTAC2D1	membrane targeting (tandem) C2 domain containing 1	AI741469	123036	---	Q8N9U0	6810 // transport // Unknown	5634 // nucleus // Unknown /// 8021 // synaptic vesicle // Unknown /// 16020 // membrane // Unknown	5215 // transporter activity // Unknown	chr14:91315850-91372516 (-) // 90.74 // q32.12	---
203185_at	RASSF2	Ras association (RalGDS/AF-6) domain family 2	NM_014737	9770	---	P50749 /// Q8IZA5	7165 // signal transduction // Unknown	---	5515 // protein binding // Unknown	chr20:4708669-4751050 (-) // 92.65 // p13	---
1558881_at	LOC145820	hypothetical protein LOC145820	AK057337	145820	---	---	---	---	---	chr15:93796025-93852080 (+) // 53.83 // q26.2	---
241394_at	LOC284120	hypothetical LOC284120	AA213799	284120	---	---	---	---	---	chr17:74125068-74137771 (-) // 91.9 // q25.3	---
207951_at	CSN2	casein beta	NM_001891	1447	115460	P05814	6810 // transport // Unknown /// 6816 // calcium ion transport // Unknown	5576 // extracellular region // Unknown	4857 // enzyme inhibitor activity // Unknown /// 5215 // transporter activity // Unknown /// 5509 // calcium ion binding // Unknown	chr4:71001734-71007771 (-) // 97.84 // q13.3	---
204014_at	DUSP4	dual specificity phosphatase 4	NM_001394	1846	602747	Q13115 /// Q13649	74 // regulation of cell cycle // Unknown /// 165 // MAPKKK cascade // Unknown /// 6470 // protein amino acid dephosphorylation // Unknown	5634 // nucleus // Unknown	8330 // protein tyrosine/threonine phosphatase activity // Unknown /// 16787 // hydrolase activity // Unknown /// 17017 // MAP kinase phosphatase activity // Unknown	chr8:29249538-29263960 (-) // 99.32 // p12	---
239169_at	RAD52B	RAD52 homolog B (S. cerevisiae)	AA761980	201299	---	Q8NG50	398 // nuclear mRNA splicing, via spliceosome // Unknown	---	3676 // nucleic acid binding // Unknown	chr17:31273595-31281875 (-) // 97.78 // q12	---
1555869_a_at	---	Homo sapiens, clone IMAGE:3451765, mRNA	BG205347	---	---	---	---	---	---	chr6:140430264-140456551 (+) // 28.92 // q24.1	---
207424_at	MYF5	myogenic factor 5	NM_005593	4617	159990	P13349 /// Q5U0P5 /// Q6ISR9	6357 // regulation of transcription from Pol II promoter // Unknown /// 7519 // myogenesis // Unknown /// 30154 // cell differentiation // Unknown	5634 // nucleus // Unknown	3677 // DNA binding // Unknown /// 3705 // RNA polymerase II transcription factor activity, enhancer binding // Unknown	chr12:79613268-79615915 (+) // 95.44 // q21.31	---
206118_at	STAT4	signal transducer and activator of transcription 4	NM_003151	6775	600558	Q14765	6357 // regulation of transcription from Pol II promoter // Unknown /// 7242 // intracellular signaling cascade // Unknown /// 7259 // JAK-STAT cascade // Unknown	5634 // nucleus // Unknown	3700 // transcription factor activity // Unknown /// 4871 // signal transducer activity // Unknown /// 5509 // calcium ion binding // Unknown	chr2:191719811-191841258 (-) // 100.0 // q32.2	---
205990_s_at	WNT5A	wingless-type MMTV integration site family, member 5A	NM_003392	7474	164975	Q6DK41 /// Q6P278	7165 // signal transduction // Unknown /// 7223 // frizzled-2 signaling pathway // Unknown /// 7267 // cell-cell signaling // Unknown /// 9653 // morphogenesis // Unknown	5615 // extracellular space // Unknown /// 5625 // soluble fraction // Unknown	5102 // receptor binding // Unknown	chr3:55476682-55490431 (-) // 94.99 // p14.3	---
212504_at	KIAA0934	KIAA0934	N31807	22982	---	Q9Y2E4 /// Q6ZP19 /// Q86XV3	8152 // metabolism // Unknown	5634 // nucleus // Unknown	3824 // catalytic activity // Unknown /// 8134 // transcription factor binding // Unknown	chr10:310129-455133 (-) // 98.63 // p15.3	---
233591_at	---	CDNA: FLJ23098 fis, clone LNG07440	AK026751	---	---	---	---	---	---	chr12:38821001-38823261 (-) // 55.7 // q12	---
205479_s_at	PLAU	plasminogen activator, urokinase	NM_002658	5328	191840	P00749 /// Q5PY49 /// Q8NAK4 /// Q96SE8	6508 // proteolysis and peptidolysis // Unknown /// 6935 // chemotaxis // Unknown /// 7165 // signal transduction // Unknown /// 7596 // blood coagulation // Unknown /// 30195 // negative regulation of blood coagulation // Unknown	5615 // extracellular space // Unknown	4263 // chymotrypsin activity // Unknown /// 4295 // trypsin activity // Unknown /// 8243 // plasminogen activator activity // Unknown /// 16301 // kinase activity // Unknown /// 16787 // hydrolase activity // Unknown	chr10:75340940-75347258 (+) // 96.88 // q22.2	Wnt_signaling // GenMAPP /// Blood_Clotting_Cascade // GenMAPP
204845_s_at	ENPEP	glutamyl aminopeptidase (aminopeptidase A)	NM_001977	2028	138297	Q07075	6508 // proteolysis and peptidolysis // Unknown /// 7267 // cell-cell signaling // Unknown /// 8283 // cell proliferation // Unknown	5887 // integral to plasma membrane // Unknown	4179 // membrane alanyl aminopeptidase activity // Unknown /// 4230 // glutamyl aminopeptidase activity // Unknown /// 8237 // metallopeptidase activity // Unknown /// 8270 // zinc ion binding // Unknown /// 16787 // hydrolase activity // Unknown	chr4:111755090-111840361 (+) // 99.83 // q25	---
1554862_at	CMAH	cytidine monophosphate-N-acetylneuraminic acid hydroxylase (CMP-N-acetylneuraminate monooxygenase)	BC022302	8418	603209	O95250 /// Q68DC3 /// Q8TCE4 /// Q9Y471	---	---	---	chr6:25235050-25246536 (-) // 83.79 // p22.2	---
215101_s_at	CXCL5	chemokine (C-X-C motif) ligand 5	BG166705	6374	600324	P42830	6935 // chemotaxis // Unknown /// 6954 // inflammatory response // Unknown /// 7165 // signal transduction // Unknown /// 7267 // cell-cell signaling // Unknown /// 8284 // positive regulation of cell proliferation // Unknown	5576 // extracellular region // Unknown	8009 // chemokine activity // Unknown	chr4:75228032-75229481 (-) // 99.06 // q13.3	---
209794_at	SRGAP3	SLIT-ROBO Rho GTPase activating protein 3	AB007871	9901	606525	O43295 /// Q8IXS7 /// Q9ULR4	---	---	5096 // GTPase activator activity // Unknown	chr3:8997277-9069759 (-) // 94.4 // p25.3	---
227395_at	MGC10233	Hypothetical protein MGC10233	BE672045	219899	---	---	6464 // protein modification // Unknown	---	---	chr11:120466043-120466695 (+) // 83.29 // q23.3	---
1555394_at	PIGK	phosphatidylinositol glycan, class K	BC026186	10026	605087	Q92643 /// P18621	6508 // proteolysis and peptidolysis // Unknown	5783 // endoplasmic reticulum // Unknown /// 16021 // integral to membrane // Unknown	1509 // legumain activity // Unknown /// 16787 // hydrolase activity // Unknown	chr1:77331241-77397135 (-) // 93.37 // p31.1	Ribosomal_Proteins // GenMAPP
219812_at	STAG3	Stromal antigen 3	NM_024070	10734	608489	Q9UJ98 /// Q6PII7 /// Q8ND88 /// Q6DKI7 /// Q9BVK3	7049 // cell cycle // Unknown /// 7059 // chromosome segregation // Unknown /// 7126 // meiosis // Unknown /// 7130 // synaptonemal complex formation // Unknown	795 // synaptonemal complex // Unknown /// 5634 // nucleus // Unknown	---	chr7:99462141-99463756 (+) // 97.65 // q22.1 /// chr7:99594591-99596209 (+) // 89.44 // q22.1	---
1568854_at	---	Homo sapiens, clone IMAGE:4828827, mRNA	AI028608	---	---	---	---	---	---	chr6:27032750-27099731 (+) // 10.93 // p22.1	---
204794_at	DUSP2	dual specificity phosphatase 2	NM_004418	1844	603068	Q05923 /// Q8WXV0	188 // inactivation of MAPK // Unknown /// 6470 // protein amino acid dephosphorylation // Unknown	5634 // nucleus // Unknown	4725 // protein tyrosine phosphatase activity // Unknown /// 8330 // protein tyrosine/threonine phosphatase activity // Unknown /// 16787 // hydrolase activity // Unknown /// 17017 // MAP kinase phosphatase activity // Unknown	chr2:96230790-96233053 (-) // 97.0 // q11.2	---
204646_at	DPYD	dihydropyrimidine dehydrogenase	NM_000110	1806	274270	Q12882 /// Q96HL6	6118 // electron transport // Unknown /// 6207 // 'de novo' pyrimidine base biosynthesis // Unknown /// 6212 // uracil catabolism // Unknown /// 6214 // thymidine catabolism // Unknown	5737 // cytoplasm // Unknown /// 5739 // mitochondrion // Unknown /// 16020 // membrane // Unknown	4152 // dihydroorotate dehydrogenase activity // Unknown /// 4158 // dihydroorotate oxidase activity // Unknown /// 5489 // electron transporter activity // Unknown /// 5506 // iron ion binding // Unknown /// 15036 // disulfide oxidoreductase activity // Unknown /// 16491 // oxidoreductase activity // Unknown /// 17113 // dihydropyrimidine dehydrogenase (NADP+) activity // Unknown	chr1:97255322-98098600 (-) // 98.53 // p21.3	Pyrimidine metabolism // KEGG /// beta-Alanine metabolism // KEGG /// Pantothenate and CoA biosynthesis // KEGG
1554884_at	PRIM2A	primase, polypeptide 2A, 58kDa	BC017833	5558	176636	P49643 /// Q8WVL2	6260 // DNA replication // Unknown /// 6269 // DNA replication, synthesis of RNA primer // Unknown	5658 // alpha DNA polymerase:primase complex // Unknown	3677 // DNA binding // Unknown /// 3896 // DNA primase activity // Unknown /// 16740 // transferase activity // Unknown	chr6:57290373-57299120 (+) // 96.35 // p12.1	DNA_replication_Reactome // GenMAPP /// G1_to_S_cell_cycle_Reactome // GenMAPP
229103_at	WNT3	Wingless-type MMTV integration site family, member 3	AA463626	7473	165330 /// 273395	P56703	7223 // frizzled-2 signaling pathway // Unknown /// 7267 // cell-cell signaling // Unknown /// 9653 // morphogenesis // Unknown	5578 // extracellular matrix (sensu Metazoa) // Unknown	4871 // signal transducer activity // Unknown /// 5201 // extracellular matrix structural constituent // Unknown	chr17:42195039-42196400 (-) // 92.04 // q21.31	Wnt_signaling // GenMAPP
205168_at	DDR2	discoidin domain receptor family, member 2	NM_006182	4921	191311	Q16832 /// Q6MZT2 /// Q7Z730	6468 // protein amino acid phosphorylation // Unknown /// 7155 // cell adhesion // Unknown /// 7165 // signal transduction // Unknown /// 7169 // transmembrane receptor protein tyrosine kinase signaling pathway // Unknown	5887 // integral to plasma membrane // Unknown	4714 // transmembrane receptor protein tyrosine kinase activity // Unknown /// 4872 // receptor activity // Unknown /// 5524 // ATP binding // Unknown /// 16740 // transferase activity // Unknown	chr1:159333917-159481869 (+) // 99.9 // q23.3	---
202587_s_at	AK1	adenylate kinase 1	BC001116	203	103000	P00568	46034 // ATP metabolism // Unknown	5829 // cytosol // Unknown	4017 // adenylate kinase activity // Unknown /// 5524 // ATP binding // Unknown /// 16301 // kinase activity // Unknown /// 16740 // transferase activity // Unknown	chr9:127709674-127719496 (-) // 92.04 // q34.11	Purine metabolism // KEGG
210544_s_at	ALDH3A2	aldehyde dehydrogenase 3 family, member A2	BC002430	224	270200	P51648 /// Q68D64	6629 // lipid metabolism // Unknown /// 7417 // central nervous system development // Unknown /// 7422 // peripheral nervous system development // Unknown /// 8152 // metabolism // Unknown /// 8544 // epidermis development // Unknown	5783 // endoplasmic reticulum // Unknown /// 5792 // microsome // Unknown /// 16021 // integral to membrane // Unknown	4029 // aldehyde dehydrogenase (NAD) activity // Unknown /// 16491 // oxidoreductase activity // Unknown	chr17:19492835-19520396 (+) // 94.24 // p11.2	Glycolysis / Gluconeogenesis // KEGG /// Ascorbate and aldarate metabolism // KEGG /// Fatty acid metabolism // KEGG /// Bile acid biosynthesis // KEGG /// Valine, leucine and isoleucine degradation // KEGG /// Lysine degradation // KEGG /// Arginine and proline metabolism // KEGG /// Histidine metabolism // KEGG /// Tryptophan metabolism // KEGG /// beta-Alanine metabolism // KEGG /// Glycerolip…
224710_at	RAB34	RAB34, member RAS oncogene family	AF322067	83871	---	Q9BZG1 /// Q6NXT3 /// Q96PJ7	7264 // small GTPase mediated signal transduction // Unknown /// 15031 // protein transport // Unknown	5794 // Golgi apparatus // Unknown	5525 // GTP binding // Unknown	chr17:24065369-24069073 (-) // 95.46 // q11.2	---
244570_at	---	CDNA FLJ33993 fis, clone DFNES2007757	AA002022	---	---	---	---	---	---	chr6:16870789-16871452 (+) // 98.33 // p22.3	---
1554507_at	NAALAD2	N-acetylated alpha-linked acidic dipeptidase 2	BC027594	10003	---	Q9Y3Q0 /// Q8IUX3	6508 // proteolysis and peptidolysis // Unknown	16021 // integral to membrane // Unknown	4180 // carboxypeptidase activity // Unknown /// 4274 // dipeptidyl-peptidase IV activity // Unknown /// 8233 // peptidase activity // Unknown /// 8237 // metallopeptidase activity // Unknown /// 16805 // dipeptidase activity // Unknown /// 43275 // glutamate carboxypeptidase II activity // Unknown	chr11:89507479-89537016 (+) // 86.29 // q14.3	---
223028_s_at	SNX9	sorting nexin 9	BC005022	51429	605952	Q9Y5X1 /// Q7Z4B8	7242 // intracellular signaling cascade // Unknown /// 8104 // protein localization // Unknown /// 15031 // protein transport // Unknown	---	5070 // SH3/SH2 adaptor protein activity // Unknown	chr6:158214704-158334366 (+) // 97.19 // q25.3	---
1559296_at	---	LOC440960	BC040632	440960	---	---	---	---	---	chr3:64645896-64972173 (+) // 68.54 // p14.1	---
226602_s_at	LOC440820	similar to breakpoint cluster region isoform 1	T30183	440820	---	---	---	---	---	chr22:19800325-19801853 (+) // 98.01 // q11.21 /// chr22:21983974-21985502 (+) // 89.62 // q11.23 /// chr22:21304902-21306433 (+) // 97.06 // q11.22 /// chr22:23373077-23374608 (+) // 97.15 // q11.23 /// chr20:23922480-23924008 (-) // 96.8 // p11.21 /// chr22:17213626-17215154 (-) // 98.27 // q11.21 /// chr22:19966347-19967875 (-) // 98.27 // q11.21 /// chr22:22977194-22978726 (-) // 97.58 // q11…	---
206804_at	CD3G	CD3G antigen, gamma polypeptide (TiT3 complex)	NM_000073	917	186740	P09693	6461 // protein complex assembly // Unknown /// 7163 // establishment and/or maintenance of cell polarity // Unknown /// 7166 // cell surface receptor linked signal transduction // Unknown /// 15031 // protein transport // Unknown /// 42110 // T-cell activation // Unknown /// 42981 // regulation of apoptosis // Unknown /// 46652 // thymocyte differentiation // Unknown	5887 // integral to plasma membrane // Unknown /// 42101 // T-cell receptor complex // Unknown	4888 // transmembrane receptor activity // Unknown /// 30159 // receptor signaling complex scaffold activity // Unknown /// 42608 // T-cell receptor binding // Unknown /// 46982 // protein heterodimerization activity // Unknown	chr11:117720310-117729261 (+) // 100.0 // q23.3	---
222364_at	---	---	AW971205	---	---	---	---	---	---	chr9:105235914-105236358 (+) // 67.84 // q31.1	---
1566557_at	---	---	AK096609	---	---	---	---	---	---	chr17:76618355-76620855 (-) // 71.63 // q25.3	---
232827_at	---	Homo sapiens, clone IMAGE:5242625, mRNA	AF148949	---	---	---	---	---	---	chr6:33707559-33708255 (-) // 15.46 // p21.31	---
219505_at	CECR1	cat eye syndrome chromosome region, candidate 1	NM_017424	51816	607575	Q9NZK5 /// Q6ZNU7 /// Q86UB6 /// Q8NCJ2 /// Q6ICF1	7275 // development // Unknown /// 9168 // purine ribonucleoside monophosphate biosynthesis // Unknown	---	8083 // growth factor activity // Unknown /// 16787 // hydrolase activity // Unknown /// 19239 // deaminase activity // Unknown	chr22:16036312-16065333 (-) // 41.94 // q11.1	---
204994_at	MX2	myxovirus (influenza virus) resistance 2 (mouse)	NM_002463	4600	147890	P20592	6955 // immune response // Unknown	5634 // nucleus // Unknown /// 5737 // cytoplasm // Unknown	3924 // GTPase activity // Unknown /// 5525 // GTP binding // Unknown	chr21:41655819-41702739 (+) // 95.88 // q22.3	---
222496_s_at	FLJ20273	RNA-binding protein	AW241742	54502	---	Q8NI52 /// Q9NXG3	---	---	3676 // nucleic acid binding // Unknown	chr4:40266211-40358907 (-) // 93.65 // p14	---
219670_at	FLJ11588	hypothetical protein FLJ11588	NM_024603	79656	---	Q7L4P6 /// Q96A62 /// Q9HAI3	---	---	---	chr1:48905561-48954523 (-) // 97.07 // p33	---
229534_at	PTE2B	peroxisomal acyl-CoA thioesterase 2B	AA046424	122970	---	Q8N9L9	6629 // lipid metabolism // Unknown	5777 // peroxisome // Unknown	4759 // serine esterase activity // Unknown /// 16290 // palmitoyl-CoA hydrolase activity // Unknown /// 16787 // hydrolase activity // Unknown	chr14:73128847-73132223 (+) // 95.45 // q24.3 /// chr19:41604699-41605650 (+) // 91.01 // q13.12	---
225496_s_at	SYTL2	synaptotagmin-like 2	N21426	54843	---	Q9HCH5 /// Q6TV07 /// Q6ZSE3 /// Q9BQS1 /// Q6ZN59 /// Q6ZVC5	6810 // transport // Unknown /// 6886 // intracellular protein transport // Unknown /// 16192 // vesicle-mediated transport // Unknown	5624 // membrane fraction // Unknown /// 8021 // synaptic vesicle // Unknown /// 16020 // membrane // Unknown /// 19897 // extrinsic to plasma membrane // Unknown /// 42470 // melanosome // Unknown	5215 // transporter activity // Unknown /// 17137 // Rab interactor activity // Unknown /// 42043 // neurexin binding // Unknown	chr11:85082911-85103828 (-) // 97.27 // q14.1	---
237841_at	C9orf5	Chromosome 9 open reading frame 5	AI022702	23731	---	Q6ZME3 /// Q96CG6 /// Q9H330 /// Q8NDJ5	---	16021 // integral to membrane // Unknown	---	chr9:108924495-108924929 (-) // 100.0 // q31.3	---
206884_s_at	SCEL	sciellin	NM_003843	8796	604112	O95171 /// Q86X00 /// Q8WW87	8544 // epidermis development // Unknown	5737 // cytoplasm // Unknown	8270 // zinc ion binding // Unknown	chr13:77007894-77116644 (+) // 98.98 // q22.3	---
236478_at	---	Transcribed locus	BE671130	---	---	---	---	---	---	chr21:33618318-33618791 (-) // 98.34 // q22.11	---
240046_at	---	---	BE217890	---	---	---	---	---	---	chr7:138394218-138394714 (-) // 33.14 // q34	---
207943_x_at	---	---	NM_006718	---	---	---	---	---	---	chr6:144303131-144311155 (-) // 80.67 // q24.2	---
221088_s_at	PPP1R9A	protein phosphatase 1, regulatory (inhibitor) subunit 9A	NM_017650	55607	602468	Q9ULJ8	7399 // neurogenesis // Unknown	5856 // cytoskeleton // Unknown	3779 // actin binding // Unknown /// 5515 // protein binding // Unknown	chr7:94542620-94564883 (+) // 98.77 // q21.3	---
211298_s_at	ALB	albumin	AF116645	213	103600 /// 194470	P02768 /// Q14551 /// Q16885 /// Q68DN5 /// Q6UXK4 /// Q8IUK7 /// Q86YG0	6810 // transport // Unknown /// 30104 // water homeostasis // Unknown /// 43072 // negative regulation of non-apoptotic programmed cell death // Unknown /// 50891 // body fluid osmoregulation // Unknown	5615 // extracellular space // Unknown	5386 // carrier activity // Unknown /// 5504 // fatty acid binding // Unknown /// 5507 // copper ion binding // Unknown /// 8144 // drug binding // Unknown /// 16209 // antioxidant activity // Unknown /// 50824 // water binding // Unknown	chr4:74644323-74651988 (+) // 80.02 // q13.3	---
214078_at	PAK3	P21 (CDKN1A)-activated kinase 3	AF070581	5063	300142	O75914	6468 // protein amino acid phosphorylation // Unknown	---	4674 // protein serine/threonine kinase activity // Unknown /// 4713 // protein-tyrosine kinase activity // Unknown /// 5524 // ATP binding // Unknown /// 16740 // transferase activity // Unknown	chrX:110175085-110176816 (+) // 69.73 // q23	G13_Signaling_Pathway // GenMAPP /// Integrin-mediated_cell_adhesion_KEGG // GenMAPP
201116_s_at	CPE	carboxypeptidase E	AI922855	1363	114855	P16870	6464 // protein modification // Unknown /// 6508 // proteolysis and peptidolysis // Unknown /// 7218 // neuropeptide signaling pathway // Unknown /// 8152 // metabolism // Unknown	5886 // plasma membrane // Unknown	4180 // carboxypeptidase activity // Unknown /// 4182 // carboxypeptidase A activity // Unknown /// 4183 // carboxypeptidase E activity // Unknown /// 8237 // metallopeptidase activity // Unknown /// 16787 // hydrolase activity // Unknown	chr4:166657698-166777302 (+) // 95.05 // q32.3	---
222116_s_at	TBC1D16	TBC1 domain family, member 16	AL157485	125058	---	Q8TBP0 /// Q8N3Z4 /// Q96DH7 /// Q9NWL9	---	---	5096 // GTPase activator activity // Unknown	chr17:75524021-75530597 (-) // 87.43 // q25.3	---
221861_at	---	MRNA; cDNA DKFZp762M127 (from clone DKFZp762M127)	AL157484	---	---	---	---	---	---	chr11:74648816-74651158 (-) // 93.97 // q13.4	---
238766_at	---	Transcribed locus, moderately similar to XP_530247.1 LOC457903 [Pan troglodytes]	AI800311	---	---	---	---	---	---	chr1:6778219-6778953 (-) // 97.48 // p36.31	---
210299_s_at	FHL1	four and a half LIM domains 1	AF063002	2273	300163	Q13642 /// Q7Z4B4	7517 // muscle development // Unknown /// 16049 // cell growth // Unknown /// 30154 // cell differentiation // Unknown	5634 // nucleus // Unknown	8270 // zinc ion binding // Unknown	chrX:134977604-135018623 (+) // 97.7 // q26.3	---
227037_at	LOC201164	similar to CG12314 gene product	AA029500	201164	---	Q8N2A8 /// Q8N5Y1 /// Q8N7H7	8152 // metabolism // Unknown /// 16042 // lipid catabolism // Unknown	---	16787 // hydrolase activity // Unknown	chr17:17045033-17046387 (-) // 73.54 // p11.2	---
201010_s_at	TXNIP	thioredoxin interacting protein	NM_006472	10628	606599	Q16226 /// Q6PML0	---	---	---	chr1:142927625-142931567 (+) // 99.45 // q21.1	---
228342_s_at	ALPK3	alpha-kinase 3	AA843297	57538	---	Q96L96 /// Q9P2L6	6468 // protein amino acid phosphorylation // Unknown /// 7507 // heart development // Unknown	5634 // nucleus // Unknown	4674 // protein serine/threonine kinase activity // Unknown /// 5524 // ATP binding // Unknown /// 16301 // kinase activity // Unknown	chr15:83214616-83217714 (+) // 40.96 // q25.3	---
234776_at	DMBX1	diencephalon/mesencephalon homeobox 1	AL137797	127343	607410	Q8NHD9 /// Q8NFW5 /// Q8NFW6	6355 // regulation of transcription, DNA-dependent // Unknown /// 7275 // development // Unknown /// 7417 // central nervous system development // Unknown /// 16481 // negative regulation of transcription // Unknown	5634 // nucleus // Unknown	3700 // transcription factor activity // Unknown	chr1:46690060-46690186 (+) // 100.0 // p33	---
239911_at	---	Full-length cDNA clone CS0DJ013YP06 of T cells (Jurkat cell line) Cot 10-normalized of Homo sapiens (human)	H49805	---	---	---	---	---	---	chr18:53300852-53301510 (+) // 89.96 // q21.31	---
213348_at	CDKN1C	cyclin-dependent kinase inhibitor 1C (p57, Kip2)	N33167	1028	130650 /// 600856	P49918	79 // regulation of cyclin dependent protein kinase activity // Unknown /// 80 // G1 phase of mitotic cell cycle // Unknown /// 7049 // cell cycle // Unknown /// 7050 // cell cycle arrest // Unknown /// 8285 // negative regulation of cell proliferation // Unknown /// 45786 // negative regulation of cell cycle // Unknown	5634 // nucleus // Unknown	4861 // cyclin-dependent protein kinase inhibitor activity // Unknown	chr11:2861023-2863568 (-) // 81.08 // p15.4	G1_to_S_cell_cycle_Reactome // GenMAPP
212658_at	LHFPL2	lipoma HMGIC fusion partner-like 2	N66633	10184	---	Q6ZUX7 /// Q7Z5P0 /// Q92605	---	---	---	chr5:77816808-77841687 (-) // 97.02 // q14.1	---
228531_at	SAMD9	sterile alpha motif domain containing 9	AA741307	54809	---	Q6P080 /// Q8IVG6 /// Q9NXS8	---	---	---	chr7:92373481-92373950 (-) // 32.92 // q21.2	---
230926_s_at	KIAA1229	KIAA1229 protein	AW452022	57489	---	Q86X31 /// Q96GC1 /// Q9ULJ1	---	---	---	chr1:86564512-86573955 (-) // 99.8 // p22.3	---
230251_at	C6orf176	chromosome 6 open reading frame 176	AA041523	90632	---	---	---	---	---	chr6:166323360-166324521 (-) // 80.36 // q27	---
221011_s_at	LBH	likely ortholog of mouse limb-bud and heart gene /// likely ortholog of mouse limb-bud and heart gene	NM_030915	81606	---	Q7LC25 /// Q8WYI9 /// Q9H0Q1	---	---	---	chr2:30366047-30394540 (+) // 97.87 // p23.1	---
